# Supplementary material
Source: publisher site journal article supplement (https://www.spandidos-publications.com/7868/downloadSupplementary)
Supplement: Supplementary file 1 [file downloadSupplementary]

## Sheet: Table SI
Table SI. Differentially expressed genes between ACC tissue and normal tissue.
Gene Symbol	Gene ID	Tumor, median	Normal, median	Log2(fold change)	Adjusted P-value
A4GALT	ENSG00000128274.15	4.66	10.64	-1.04	1.44e-5
AADAC	ENSG00000114771.13	0.96	192.584	-6.626	2.67e-60
AASS	ENSG00000008311.14	1.98	7.735	-1.551	4.39e-33
ABCA1	ENSG00000165029.15	3.24	31.83	-2.953	1.57e-49
ABCA10	ENSG00000154263.17	0.45	2.905	-1.429	3.10e-26
ABCA5	ENSG00000154265.15	8.17	19.225	-1.141	2.54e-15
ABCA6	ENSG00000154262.12	0.31	4.22	-1.994	3.81e-28
ABCA8	ENSG00000141338.13	9.17	49.35	-2.308	9.73e-26
ABCA9	ENSG00000154258.16	0.22	2.97	-1.702	1.44e-43
ABCB1	ENSG00000085563.14	56.141	208.433	-1.874	1.05e-20
ABCC3	ENSG00000108846.15	26.48	204.541	-2.903	4.52e-37
ABCC6P2	ENSG00000255277.3	1.52	0.25	1.011	8.38e-19
ABCG1	ENSG00000160179.18	8.06	34.195	-1.958	8.06e-20
ABI3BP	ENSG00000154175.16	1.62	7.73	-1.736	1.41e-4
ABLIM1	ENSG00000099204.18	3.25	71.993	-4.102	1.55e-38
ABLIM3	ENSG00000173210.19	2.81	7.345	-1.131	4.62e-8
ABO	ENSG00000175164.13	2.76	13.56	-1.953	1.85e-16
ABRACL	ENSG00000146386.7	18.181	5.32	1.602	1.78e-23
ABTB1	ENSG00000114626.17	9.42	25.579	-1.351	3.72e-18
AC000089.3	ENSG00000235776.2	2.66	0.35	1.439	8.09e-56
AC003991.3	ENSG00000228113.7	0.04	2.175	-1.61	1.03e-38
AC005062.2	ENSG00000243004.5	0.96	3.555	-1.217	6.05e-35
AC005104.3	ENSG00000223374.1	0.24	2.01	-1.279	9.03e-48
AC005154.6	ENSG00000196295.11	12.69	35.685	-1.422	2.03e-33
AC005154.7	ENSG00000244480.1	0.27	1.85	-1.166	1.27e-48
AC005255.3	ENSG00000256210.3	4.21	0.409	1.887	6.72e-27
AC005517.3	ENSG00000223878.1	0.26	2.47	-1.461	2.81e-49
AC005519.4	ENSG00000258559.2	0.54	2.57	-1.213	4.51e-50
AC005786.7	ENSG00000267436.1	7.63	0	3.109	2.69e-16
AC005943.2	ENSG00000267059.2	0.12	1.67	-1.253	1.64e-10
AC005943.6	ENSG00000279009.1	7.18	0	3.032	7.30e-11
AC005944.2	ENSG00000267469.1	12.31	2.345	1.993	1.32e-17
AC006116.27	ENSG00000267459.1	0	1.845	-1.508	4.34e-17
AC006126.4	ENSG00000267045.1	1.08	4.885	-1.5	2.14e-32
AC006128.2	ENSG00000279716.1	4.64	16.89	-1.665	2.44e-27
AC006449.2	ENSG00000279119.1	6.74	23.585	-1.667	2.43e-23
AC006547.13	ENSG00000236540.7	1.4	3.885	-1.025	3.32e-28
AC007192.6	ENSG00000269145.2	5.15	1.615	1.234	3.18e-16
AC007283.5	ENSG00000234431.2	5.09	0.659	1.876	6.33e-29
AC007326.1	ENSG00000279560.1	0	3.56	-2.189	7.99e-46
AC007566.10	ENSG00000244055.1	0.33	2.195	-1.264	8.69e-49
AC008746.5	ENSG00000235681.1	0	1.3	-1.202	4.04e-9
AC008993.2	ENSG00000282542.1	0.23	1.52	-1.035	6.63e-36
AC009060.2	ENSG00000280006.1	0.15	2.825	-1.734	1.20e-37
AC009120.3	ENSG00000239763.2	0.4	1.985	-1.092	3.90e-37
AC009237.5	ENSG00000237308.1	1.29	0	1.195	1.51e-30
AC009410.1	ENSG00000232023.2	11.21	24.625	-1.07	5.86e-12
AC010980.2	ENSG00000237732.9	1.14	3.795	-1.164	1.03e-16
AC011239.1	ENSG00000224361.1	0.82	4.47	-1.588	2.49e-25
AC011737.2	ENSG00000204196.5	19.65	8.485	1.122	2.03e-23
AC011747.4	ENSG00000236008.1	0.23	1.615	-1.088	2.16e-7
AC012065.1	ENSG00000279307.1	2.61	0.32	1.451	1.43e-57
AC012314.8	ENSG00000237017.1	0.24	2.275	-1.401	2.69e-42
AC013463.2	ENSG00000236283.3	0.26	1.84	-1.172	3.05e-22
AC015849.19	ENSG00000270871.1	0.08	1.395	-1.149	6.82e-51
AC016292.3	ENSG00000108958.4	2.42	0.605	1.091	5.52e-24
AC016734.2	ENSG00000228305.2	2.12	0.54	1.019	2.11e-29
AC016739.2	ENSG00000218175.2	19.02	8.835	1.025	2.65e-18
AC019181.2	ENSG00000233255.1	0.11	1.32	-1.064	2.11e-31
AC019181.3	ENSG00000224331.2	0.22	2.18	-1.382	1.19e-30
AC020571.3	ENSG00000229056.2	0.14	1.41	-1.08	1.57e-9
AC024560.3	ENSG00000214135.8	3.83	11.465	-1.368	1.12e-31
AC064875.2	ENSG00000225649.5	0.09	1.355	-1.111	4.11e-40
AC068580.5	ENSG00000229512.1	0	1.28	-1.189	1.13e-19
AC068580.6	ENSG00000235027.1	0.76	2.72	-1.08	1.76e-28
AC072052.7	ENSG00000231359.3	0	1.365	-1.242	2.49e-5
AC074117.10	ENSG00000234072.1	1.35	3.96	-1.078	1.62e-27
AC074289.1	ENSG00000225889.7	0.38	2.35	-1.28	2.91e-27
AC079250.1	ENSG00000230979.3	2.7	0.6	1.209	1.63e-36
AC079779.4	ENSG00000228643.1	0.53	2.705	-1.276	7.99e-17
AC079922.2	ENSG00000231747.1	1.44	0.19	1.036	1.10e-45
AC090616.2	ENSG00000214708.4	1.28	3.745	-1.057	4.96e-14
AC092155.4	ENSG00000226622.5	0	1.32	-1.214	1.49e-26
AC093110.3	ENSG00000238018.2	0.21	4.485	-2.18	2.21e-75
AC093495.4	ENSG00000228242.6	1.7	4.58	-1.047	2.22e-22
AC093642.3	ENSG00000237940.3	0.14	1.615	-1.198	2.00e-27
AC093642.5	ENSG00000220804.8	1	3.085	-1.03	1.60e-26
AC093690.1	ENSG00000223522.1	0.07	1.395	-1.162	9.30e-39
AC093838.4	ENSG00000152117.17	4.87	10.74	-1	1.47e-18
AC096772.6	ENSG00000244567.1	3.04	7.235	-1.027	7.99e-20
AC104654.2	ENSG00000234362.5	0.18	1.4	-1.024	1.60e-19
AC110615.1	ENSG00000279909.1	6.51	0	2.909	5.97e-21
AC112497.1	ENSG00000279413.1	3.32	1.05	1.075	7.60e-25
AC129492.1	ENSG00000279152.1	0	2	-1.585	1.72e-21
AC132217.4	ENSG00000240801.1	5394.22	46.691	6.822	1.44e-40
AC137934.1	ENSG00000260923.5	0.7	3.84	-1.509	1.61e-26
AC138035.2	ENSG00000238035.8	0.86	7.599	-2.209	4.46e-59
AC138649.1	ENSG00000277867.1	0	4.525	-2.466	6.28e-38
AC159540.1	ENSG00000230606.10	6.52	14.115	-1.007	1.78e-11
ACAA2	ENSG00000167315.17	14.91	65.459	-2.063	2.11e-19
ACACA	ENSG00000278540.4	11.76	24.594	-1.004	6.87e-18
ACACB	ENSG00000076555.15	10.09	24.455	-1.199	2.91e-21
ACAD11	ENSG00000240303.7	5.91	20.549	-1.641	4.20e-39
ACAD8	ENSG00000151498.11	11.14	25.969	-1.152	1.51e-25
ACADL	ENSG00000115361.7	5.33	1.015	1.651	3.24e-11
ACADM	ENSG00000117054.13	29.619	72.348	-1.26	3.94e-10
ACADVL	ENSG00000072778.19	421.123	1217.87	-1.53	5.70e-22
ACAP3	ENSG00000131584.18	16.77	37.125	-1.101	7.90e-21
ACBD4	ENSG00000181513.14	7.28	17.815	-1.184	1.72e-22
ACCS	ENSG00000110455.13	6.63	41.161	-2.466	1.83e-41
ACKR1	ENSG00000213088.9	0.71	6.273	-2.089	1.51e-20
ACKR3	ENSG00000144476.5	5.91	1.91	1.248	9.30e-17
ACO1	ENSG00000122729.18	19.211	49.5	-1.321	2.75e-17
ACOT2	ENSG00000119673.14	19.9	47.52	-1.215	3.09e-13
ACOX2	ENSG00000168306.12	3.71	20.779	-2.209	6.34e-14
ACRC	ENSG00000147174.11	0.49	2.07	-1.043	5.75e-12
ACSBG1	ENSG00000103740.9	0.08	1.5	-1.211	5.77e-18
ACSF2	ENSG00000167107.12	50.579	123.292	-1.269	9.86e-14
ACSL5	ENSG00000197142.10	1.07	3.29	-1.051	7.45e-10
ACSM3	ENSG00000005187.11	15.07	6.585	1.083	7.00e-9
ACSM5	ENSG00000183549.10	0.27	2.22	-1.342	1.41e-27
ACTA1	ENSG00000143632.14	0.07	2.31	-1.629	3.03e-27
ACTA2-AS1	ENSG00000180139.11	0.32	2.725	-1.497	5.39e-33
ACTG2	ENSG00000163017.13	0.71	4.05	-1.562	3.89e-14
ACTN1	ENSG00000072110.13	21.44	44.571	-1.022	9.28e-12
ACTR3	ENSG00000115091.11	46.898	95.229	-1.006	2.14e-8
ACTR3C	ENSG00000106526.10	2.28	7.065	-1.298	9.95e-11
ACVRL1	ENSG00000139567.12	4.34	10.92	-1.158	8.92e-24
ADAM22	ENSG00000008277.14	1.37	4.23	-1.142	2.88e-14
ADAM28	ENSG00000042980.12	0.53	2.525	-1.204	4.27e-23
ADAM33	ENSG00000149451.17	0.12	3.46	-1.994	1.66e-37
ADAM9	ENSG00000168615.11	12.58	26.53	-1.019	1.38e-8
ADAMTS1	ENSG00000154734.14	4.28	20.355	-2.016	2.55e-26
ADAMTS10	ENSG00000142303.13	2.14	22.325	-2.893	1.20e-40
ADAMTS12	ENSG00000151388.10	0.78	2.76	-1.079	2.61e-9
ADAMTS2	ENSG00000087116.13	1.15	8.66	-2.168	2.01e-44
ADAMTSL1	ENSG00000178031.15	1.17	5.44	-1.569	5.55e-20
ADAMTSL2	ENSG00000197859.9	1.17	20.355	-3.299	1.02e-64
ADAMTSL3	ENSG00000156218.12	0.18	1.525	-1.097	1.39e-35
ADAMTSL4	ENSG00000143382.13	1.52	9.845	-2.106	1.97e-34
ADAP2	ENSG00000184060.10	1.62	5.31	-1.268	5.82e-17
ADAT2	ENSG00000189007.15	1.7	6.97	-1.562	4.58e-56
ADCK2	ENSG00000133597.9	17.03	7.92	1.015	9.61e-20
ADCK3	ENSG00000163050.16	40.36	191.406	-2.218	1.93e-17
ADCY4	ENSG00000129467.13	1.47	11.81	-2.375	3.08e-60
ADCY5	ENSG00000173175.14	0.41	2.42	-1.278	2.78e-8
ADCY6	ENSG00000174233.11	9.01	21.785	-1.187	6.62e-21
ADCY7	ENSG00000121281.12	0.67	3.875	-1.546	2.11e-31
ADGRE2	ENSG00000127507.17	0.34	1.805	-1.066	5.60e-21
ADGRF5	ENSG00000069122.18	4.15	11.025	-1.223	3.72e-21
ADGRL2	ENSG00000117114.19	7.29	20.93	-1.404	1.79e-14
ADGRV1	ENSG00000164199.15	2.81	94.532	-4.648	3.02e-39
ADH1B	ENSG00000196616.12	1.44	81.744	-5.084	8.87e-48
ADHFE1	ENSG00000147576.15	2.93	13.46	-1.879	2.58e-31
ADIRF-AS1	ENSG00000272734.1	3.31	14.865	-1.88	3.20e-28
ADORA3	ENSG00000121933.17	2.2	9.015	-1.646	1.04e-17
ADPRH	ENSG00000144843.11	1.81	5.54	-1.219	3.09e-24
ADPRHL1	ENSG00000153531.12	0.76	2.96	-1.17	8.70e-12
ADRBK2	ENSG00000100077.14	0.72	2.45	-1.004	1.83e-27
AEBP1	ENSG00000106624.8	7.92	62.68	-2.836	1.41e-35
AF127577.10	ENSG00000229047.1	20.99	7.055	1.449	1.72e-21
AFF1	ENSG00000172493.20	6.02	14.735	-1.164	8.08e-19
AFG3L1P	ENSG00000223959.8	6.29	16.545	-1.267	8.32e-35
AGAP4	ENSG00000188234.13	4.83	11.995	-1.156	4.86e-27
AGAP5	ENSG00000172650.12	1.75	6.33	-1.414	2.99e-38
AGAP9	ENSG00000204172.11	3.12	9.71	-1.378	6.54e-23
AGBL2	ENSG00000165923.15	0.58	3.195	-1.409	2.60e-28
AGO4	ENSG00000134698.10	1.3	5.73	-1.549	1.05e-47
AGRP	ENSG00000159723.4	41.151	7.919	2.241	1.68e-11
AGTR1	ENSG00000144891.17	10.04	29.975	-1.488	9.01e-13
AHI1	ENSG00000135541.20	5.27	17.44	-1.556	1.17e-35
AHNAK	ENSG00000124942.13	8.3	25.015	-1.484	1.81e-16
AHSA2	ENSG00000173209.22	13.92	91.724	-2.636	1.49e-53
AIF1	ENSG00000204472.12	13.59	28.973	-1.039	2.30e-5
AIF1L	ENSG00000126878.12	11.41	3.37	1.506	1.61e-15
AK4	ENSG00000162433.14	3.11	0.71	1.265	4.04e-16
AKAP12	ENSG00000131016.16	0.98	6.635	-1.947	1.04e-29
AKAP17A	ENSG00000197976.10	16.16	34.795	-1.061	1.86e-19
AKAP7	ENSG00000118507.15	13.62	36.805	-1.371	7.00e-14
AKR1B1	ENSG00000085662.13	876.432	2900.53	-1.725	2.49e-15
AKR1B10	ENSG00000198074.9	0.67	4.079	-1.605	9.64e-12
AKR1C2	ENSG00000151632.16	3.13	8.905	-1.262	7.49e-3
AKR7A3	ENSG00000162482.4	0.64	2.885	-1.244	2.96e-29
AKT3	ENSG00000117020.16	3.83	9.23	-1.083	1.04e-14
AL132709.8	ENSG00000232018.4	0.4	1.935	-1.068	2.14e-18
AL158801.1	ENSG00000279392.1	3.56	0.42	1.683	9.36e-49
AL162151.3	ENSG00000234648.1	50.86	278.348	-2.429	1.19e-7
AL442127.1	ENSG00000278371.2	0	17.48	-4.208	9.38e-23
AL513523.2	ENSG00000279767.1	19.49	8.835	1.059	2.75e-8
ALAD	ENSG00000148218.15	41.501	169.741	-2.006	8.01e-21
ALAS1	ENSG00000023330.14	112.391	464.214	-2.037	1.09e-22
ALB	ENSG00000163631.16	0.55	2.234	-1.061	2.01e-5
ALCAM	ENSG00000170017.12	2.58	6.34	-1.036	1.51e-8
ALDH1A1	ENSG00000165092.12	11.1	99.249	-3.051	8.14e-18
ALDH1A3	ENSG00000184254.16	0.61	8.46	-2.555	1.26e-30
ALDH1L1	ENSG00000144908.13	7.09	30.474	-1.96	2.55e-14
ALDH3A2	ENSG00000072210.18	69.502	177.361	-1.339	1.16e-20
ALDH3B1	ENSG00000006534.15	7.16	22.275	-1.512	1.34e-16
ALDOC	ENSG00000109107.13	73.511	17.485	2.011	3.92e-19
ALKBH7	ENSG00000125652.7	96.562	47.72	1.002	2.70e-20
ALOX15B	ENSG00000179593.15	0.28	1.675	-1.063	1.85e-12
ALOX5	ENSG00000012779.10	1.18	12.699	-2.652	5.20e-45
ALOX5AP	ENSG00000132965.9	4.05	21.953	-2.184	6.51e-21
ALPK3	ENSG00000136383.6	0.47	6.66	-2.381	3.41e-40
ALPL	ENSG00000162551.13	20.82	63.421	-1.562	9.54e-10
ALS2CL	ENSG00000178038.16	0.76	7.65	-2.297	2.01e-45
AMDHD1	ENSG00000139344.7	1.74	8.328	-1.767	1.95e-22
AMH	ENSG00000104899.5	2.56	0.345	1.404	2.16e-21
AMICA1	ENSG00000160593.17	0.71	2.435	-1.006	3.63e-7
AMIGO1	ENSG00000181754.6	3.91	9.13	-1.045	2.34e-13
AMOTL2	ENSG00000114019.14	3.5	9.23	-1.185	2.02e-11
AMPD3	ENSG00000133805.15	4.05	18.6	-1.956	1.70e-25
AMT	ENSG00000145020.14	1.97	26.874	-3.23	1.19e-56
AMY2A	ENSG00000243480.7	0	1.06	-1.043	1.18e-22
AMY2B	ENSG00000240038.6	5.64	19.045	-1.594	6.21e-28
ANAPC4	ENSG00000053900.10	7.65	19.31	-1.231	3.31e-28
ANGEL1	ENSG00000013523.9	7.22	16.69	-1.106	4.73e-22
ANGPT2	ENSG00000091879.13	4.35	0.19	2.169	3.05e-47
ANGPTL1	ENSG00000116194.12	1.12	26.15	-3.679	5.05e-31
ANGPTL2	ENSG00000136859.9	17.111	6.425	1.286	3.18e-18
ANGPTL4	ENSG00000167772.11	5.38	13.13	-1.147	1.09e-6
ANGPTL7	ENSG00000171819.4	0	1.4	-1.263	3.41e-29
ANK2	ENSG00000145362.16	3.13	10.235	-1.444	4.69e-18
ANKFY1	ENSG00000185722.16	5.77	17.755	-1.47	1.71e-32
ANKRD10	ENSG00000088448.14	25.189	54.664	-1.088	5.43e-25
ANKRD10-IT1	ENSG00000229152.2	1.27	5.86	-1.596	2.32e-48
ANKRD23	ENSG00000163126.14	0.85	2.705	-1.002	1.07e-35
ANKRD53	ENSG00000144031.11	0.24	1.89	-1.221	3.36e-31
ANKS1A	ENSG00000064999.13	3.43	15.555	-1.902	1.39e-43
ANKZF1	ENSG00000163516.13	14.15	33.13	-1.172	7.33e-23
ANLN	ENSG00000011426.10	5.91	0.845	1.905	4.30e-26
ANO7P1	ENSG00000237276.8	0.96	4.175	-1.401	2.56e-36
ANPEP	ENSG00000166825.13	0.76	8.07	-2.366	6.00e-27
ANTXR1	ENSG00000169604.19	16.979	38.634	-1.14	8.83e-21
ANTXR2	ENSG00000163297.16	12.52	27.327	-1.067	3.65e-11
ANXA3	ENSG00000138772.12	0.43	2.145	-1.137	5.87e-8
AOC3	ENSG00000131471.6	9.11	38.141	-1.953	1.71e-8
AOX1	ENSG00000138356.13	38.94	294.545	-2.887	3.88e-30
AOX3P	ENSG00000244301.5	0.11	1.985	-1.427	2.55e-36
AP000347.2	ENSG00000272578.5	0.72	3.34	-1.335	1.45e-37
AP000347.4	ENSG00000234353.2	0.94	5.465	-1.736	2.25e-30
AP000473.5	ENSG00000228798.1	0.16	1.78	-1.261	7.63e-33
AP000580.1	ENSG00000219529.2	1.82	5.755	-1.26	7.17e-22
AP000783.1	ENSG00000254667.2	10.32	49.494	-2.157	2.54e-18
AP000892.6	ENSG00000280143.1	1.2	8.404	-2.096	3.59e-48
AP001189.4	ENSG00000236304.1	0.06	1.355	-1.152	2.69e-54
AP006621.5	ENSG00000255284.1	2.49	6.1	-1.025	2.84e-20
AP1G2	ENSG00000213983.11	26.88	61.935	-1.175	1.14e-14
AP1S1	ENSG00000106367.13	71.209	28.515	1.291	2.51e-19
AP3B2	ENSG00000103723.12	0.82	2.995	-1.134	1.38e-15
APBB1IP	ENSG00000077420.15	0.78	3.96	-1.478	2.05e-22
APBB3	ENSG00000113108.17	23.079	61.984	-1.387	3.94e-24
APCDD1	ENSG00000154856.12	5.27	12.78	-1.136	1.52e-3
APLP1	ENSG00000105290.11	14.48	2.43	2.174	9.98e-6
APOBEC3B	ENSG00000179750.15	7.45	0.985	2.09	7.88e-23
APOBEC3G	ENSG00000239713.7	2.26	9.605	-1.702	1.45e-23
APOC1	ENSG00000130208.9	215.567	1640.82	-2.922	1.52e-17
APOC1P1	ENSG00000214855.9	1.13	10.485	-2.431	1.41e-17
APOD	ENSG00000189058.8	5.19	29.64	-2.307	3.34e-18
APOE	ENSG00000130203.9	891.319	2834.15	-1.668	7.40e-9
APOL1	ENSG00000100342.20	5.69	12.715	-1.036	8.39e-5
APOL3	ENSG00000128284.19	4.51	16.185	-1.641	3.26e-29
APOLD1	ENSG00000178878.12	6.24	2.19	1.182	2.74e-10
AQP11	ENSG00000178301.3	4.42	10.475	-1.082	7.32e-13
ARAP1	ENSG00000186635.14	31.76	69.54	-1.106	6.98e-15
ARAP1-AS1	ENSG00000256007.1	12.73	0	3.779	2.23e-16
ARFGAP3	ENSG00000242247.10	24.401	65.974	-1.399	1.61e-23
ARFGEF2	ENSG00000124198.8	7.29	16.975	-1.117	3.91e-14
ARGLU1	ENSG00000134884.13	20.11	96.251	-2.204	1.22e-50
ARHGAP21	ENSG00000107863.16	10.51	29.471	-1.405	5.05e-25
ARHGAP27	ENSG00000159314.11	2.68	8.64	-1.389	9.90e-33
ARHGAP30	ENSG00000186517.13	0.78	3.82	-1.437	6.75e-26
ARHGAP32	ENSG00000134909.18	1.89	5.815	-1.238	1.79e-23
ARHGAP4	ENSG00000089820.15	8.31	24.84	-1.473	2.50e-13
ARHGAP9	ENSG00000123329.17	2.05	8.755	-1.677	5.07e-27
ARHGEF10	ENSG00000104728.15	4.07	10.045	-1.123	1.77e-23
ARHGEF10L	ENSG00000074964.16	4.98	13	-1.227	8.40e-25
ARHGEF17	ENSG00000110237.3	3.05	11.94	-1.676	2.11e-32
ARHGEF25	ENSG00000240771.6	3	9.765	-1.428	2.33e-17
ARHGEF28	ENSG00000214944.9	5.9	23.67	-1.838	9.37e-29
ARHGEF5	ENSG00000050327.14	0.19	2.06	-1.362	2.58e-18
ARHGEF7	ENSG00000102606.17	9.05	23.855	-1.306	4.83e-36
ARL17A	ENSG00000185829.15	2.16	6.055	-1.159	6.58e-34
ARMC9	ENSG00000135931.17	8.14	19.835	-1.189	2.14e-17
ARMCX4	ENSG00000196440.11	3.47	13.605	-1.708	1.55e-38
ARMCX7P	ENSG00000204072.3	21.17	2.655	2.601	2.11e-18
ARNT	ENSG00000143437.20	6.22	18.99	-1.469	7.30e-29
ARNTL	ENSG00000133794.17	6.13	13.46	-1.02	1.82e-17
ARPC4-TTLL3	ENSG00000250151.9	2.72	8.809	-1.399	1.13e-25
ARRB1	ENSG00000137486.16	1.99	5.495	-1.119	3.39e-15
ARRB2	ENSG00000141480.17	11.42	47.339	-1.961	3.78e-40
AS3MT	ENSG00000214435.7	73.439	256.817	-1.792	3.27e-18
ASF1B	ENSG00000105011.8	8.16	1.15	2.091	1.89e-34
ASH1L	ENSG00000116539.10	3.98	9.68	-1.101	1.72e-25
ASMTL-AS1	ENSG00000236017.7	4.28	28.924	-2.503	5.04e-49
ASTN1	ENSG00000152092.15	4.43	11.855	-1.243	3.32e-9
ATAD3B	ENSG00000160072.19	6.39	14.59	-1.077	1.84e-20
ATAT1	ENSG00000137343.17	3.41	7.97	-1.024	5.06e-27
ATF7IP2	ENSG00000166669.13	9.27	43.385	-2.112	2.71e-33
ATG16L2	ENSG00000168010.10	5.46	28.045	-2.169	3.43e-52
ATG2B	ENSG00000066739.11	2.56	7.345	-1.229	1.56e-25
ATHL1	ENSG00000142102.15	1.75	8.955	-1.856	2.15e-30
ATM	ENSG00000149311.17	5.16	13.73	-1.258	1.18e-22
ATP10A	ENSG00000206190.11	0.33	6	-2.396	2.16e-20
ATP11A	ENSG00000068650.18	3.17	13.26	-1.774	8.69e-40
ATP1A1-AS1	ENSG00000203865.9	1.07	3.63	-1.161	2.17e-27
ATP1A3	ENSG00000105409.15	2.73	0.2	1.636	2.29e-6
ATP1B2	ENSG00000129244.8	2.38	6.665	-1.181	1.91e-8
ATP6V1F	ENSG00000128524.4	283.046	131.748	1.097	8.49e-25
ATP8A1	ENSG00000124406.16	3.8	9.96	-1.191	4.52e-16
ATP8B1	ENSG00000081923.10	1.55	4.6	-1.135	3.09e-22
ATP8B2	ENSG00000143515.16	3.15	9.215	-1.3	4.09e-22
ATRNL1	ENSG00000107518.16	1.75	7.945	-1.702	1.31e-17
ATRX	ENSG00000085224.20	5.61	12.35	-1.014	1.22e-15
AURKA	ENSG00000087586.17	7.04	1.66	1.596	1.65e-26
AURKB	ENSG00000178999.12	4.19	1.585	1.006	7.04e-9
AVIL	ENSG00000135407.10	2.72	8.71	-1.384	5.58e-16
AVPR1A	ENSG00000166148.3	0.41	18.61	-3.798	7.79e-40
AXIN2	ENSG00000168646.12	2.91	9.365	-1.407	1.01e-13
AXL	ENSG00000167601.11	2.33	11.21	-1.875	1.43e-37
AZI2	ENSG00000163512.13	13.12	31.52	-1.204	3.72e-20
AZIN2	ENSG00000142920.16	2.46	6.525	-1.121	1.97e-16
B3GALNT2	ENSG00000162885.12	2.18	6.259	-1.191	8.07e-15
B3GALT4	ENSG00000235863.3	3.17	7.95	-1.102	2.28e-11
B3GNT7	ENSG00000156966.6	2.27	9.085	-1.625	7.51e-18
B3GNT8	ENSG00000177191.2	4	1.11	1.245	1.73e-12
B4GALNT3	ENSG00000139044.10	3.8	10.02	-1.199	1.73e-13
B4GALT6	ENSG00000118276.11	2	9.865	-1.857	3.31e-32
BAHCC1	ENSG00000266074.8	1.12	9.495	-2.308	2.98e-41
BANK1	ENSG00000153064.11	0.94	3.435	-1.193	2.63e-7
BATF2	ENSG00000168062.9	0.87	3.405	-1.236	3.13e-18
BAZ2A	ENSG00000076108.11	16.16	36.354	-1.122	1.59e-14
BAZ2B	ENSG00000123636.17	5.41	17.3	-1.513	1.21e-30
BBS1	ENSG00000174483.19	10.23	21.529	-1.004	2.84e-13
BBS4	ENSG00000140463.13	7.89	17.84	-1.084	6.24e-23
BCAT1	ENSG00000060982.14	0.77	2.655	-1.046	4.05e-10
BCL2L10	ENSG00000137875.4	0.4	2.395	-1.278	1.97e-14
BCL2L2-PABPN1	ENSG00000258643.5	1.27	4.525	-1.283	4.01e-9
BCL6	ENSG00000113916.17	7.75	51.294	-2.579	2.79e-47
BCL9L	ENSG00000186174.12	4.76	30.314	-2.443	7.58e-37
BCO2	ENSG00000197580.11	13.3	36.41	-1.387	3.20e-8
BEGAIN	ENSG00000183092.15	0.19	1.58	-1.116	1.99e-17
BEST1	ENSG00000167995.15	0.79	3.075	-1.187	4.34e-21
BEX1	ENSG00000133169.5	85.882	6.875	3.464	1.09e-10
BGN	ENSG00000182492.15	69.458	161.321	-1.204	2.47e-13
BHLHE40-AS1	ENSG00000235831.6	0.22	2.025	-1.31	6.34e-33
BHMT2	ENSG00000132840.9	1.25	19.49	-3.187	1.08e-38
BICC1	ENSG00000122870.11	0.98	2.97	-1.004	1.41e-16
BIN2	ENSG00000110934.10	0.84	2.71	-1.012	5.36e-17
BIRC5	ENSG00000089685.14	4.48	0.845	1.571	1.13e-13
BIRC7	ENSG00000101197.12	14.61	0.22	3.678	4.85e-27
BIVM	ENSG00000134897.13	3.83	9.65	-1.141	7.51e-28
BLOC1S1	ENSG00000135441.7	334.693	146.997	1.182	3.00e-28
BLVRB	ENSG00000090013.9	134.848	66.445	1.01	4.87e-11
BMP1	ENSG00000168487.17	8.86	38.35	-1.997	2.06e-23
BMS1P20	ENSG00000236850.4	0.83	2.865	-1.079	5.17e-38
BMS1P4	ENSG00000271816.1	0.38	1.835	-1.039	7.29e-36
BOC	ENSG00000144857.14	1.4	4.58	-1.217	2.67e-24
BOK	ENSG00000176720.4	1.71	6.7	-1.507	6.06e-9
BOLA2	ENSG00000183336.7	12.69	5.545	1.065	9.10e-13
BOLA2B	ENSG00000169627.7	129.579	41.8	1.609	8.53e-35
BRE	ENSG00000158019.20	40.391	299.32	-2.859	1.65e-30
BRINP2	ENSG00000198797.6	0.96	9.455	-2.415	1.78e-21
BRIX1	ENSG00000113460.12	28.919	13.77	1.018	1.11e-15
BSG	ENSG00000172270.18	1108.73	513.492	1.109	4.13e-18
BSPRY	ENSG00000119411.10	0.27	3.11	-1.694	3.17e-32
BTAF1	ENSG00000095564.13	3.42	11.48	-1.497	6.18e-35
BTBD11	ENSG00000151136.14	1.94	0.3	1.177	2.33e-22
BTBD19	ENSG00000222009.8	4.24	17.555	-1.824	4.47e-31
BTK	ENSG00000010671.15	0.75	3.215	-1.268	2.10e-22
BTN2A3P	ENSG00000124549.14	1.25	4.14	-1.192	1.07e-36
BTN3A1	ENSG00000026950.16	8.65	19.8	-1.108	8.18e-19
BTN3A3	ENSG00000111801.15	8.67	19.505	-1.084	1.80e-15
BTNL9	ENSG00000165810.16	3.92	13.965	-1.605	5.99e-23
BUB1	ENSG00000169679.14	2.23	0.38	1.227	1.55e-22
BX322557.10	ENSG00000215447.7	0.78	3.395	-1.304	1.92e-27
BZRAP1	ENSG00000005379.15	8.08	26.866	-1.618	3.59e-28
C10orf10	ENSG00000165507.8	8.64	29.098	-1.643	7.70e-15
C10orf35	ENSG00000171224.8	9.49	2.65	1.523	3.27e-19
C10orf82	ENSG00000165863.16	16.13	2.145	2.445	5.63e-10
C11orf45	ENSG00000174370.9	0.26	2.575	-1.505	5.45e-31
C11orf54	ENSG00000182919.14	4.88	19.71	-1.816	5.66e-32
C11orf96	ENSG00000187479.5	22.71	93.389	-1.993	3.67e-23
C12orf45	ENSG00000151131.9	23.051	9.72	1.166	7.14e-30
C12orf75	ENSG00000235162.8	15.96	5.22	1.447	7.23e-16
C14orf180	ENSG00000184601.10	0.02	1.895	-1.505	1.71e-34
C15orf52	ENSG00000188549.12	3.57	11.835	-1.49	9.81e-23
C16orf86	ENSG00000159761.14	1.94	5.22	-1.081	1.87e-22
C17orf85	ENSG00000074356.16	6.97	15.015	-1.007	1.79e-26
C19orf48	ENSG00000167747.13	139.4	21.76	2.625	5.64e-33
C19orf53	ENSG00000104979.8	286.243	107.325	1.407	5.04e-32
C1orf115	ENSG00000162817.6	9.05	3.715	1.092	3.26e-11
C1orf132	ENSG00000203709.9	0.25	3.285	-1.777	1.91e-49
C1orf162	ENSG00000143110.11	4.05	15.615	-1.718	1.82e-21
C1orf228	ENSG00000198520.10	1.03	5.49	-1.677	3.34e-38
C1QB	ENSG00000173369.15	62.43	188.033	-1.575	1.25e-9
C1QC	ENSG00000159189.11	40.72	120.008	-1.536	9.73e-8
C1QTNF1	ENSG00000173918.14	22.19	54.869	-1.269	3.59e-16
C1QTNF1-AS1	ENSG00000265096.1	8.03	17.425	-1.029	8.74e-13
C1R	ENSG00000159403.15	39.86	182.492	-2.167	3.63e-18
C1RL	ENSG00000139178.10	27.07	76.114	-1.458	9.68e-19
C1RL-AS1	ENSG00000205885.7	0.87	3.135	-1.145	3.37e-25
C1S	ENSG00000182326.14	31.93	176.539	-2.431	2.75e-26
C2	ENSG00000166278.14	3.13	11.318	-1.577	1.99e-10
C2CD2	ENSG00000157617.16	46.15	110.971	-1.248	2.28e-17
C2orf40	ENSG00000119147.9	0.21	5.185	-2.354	1.08e-34
C2orf88	ENSG00000187699.10	0.57	4.709	-1.863	3.93e-23
C3	ENSG00000125730.16	255.999	686.135	-1.419	1.06e-5
C3AR1	ENSG00000171860.4	1.78	7.045	-1.533	2.04e-11
C3orf18	ENSG00000088543.14	4.3	10.185	-1.077	8.82e-12
C4A-AS1	ENSG00000233627.2	2.76	11.929	-1.782	7.97e-26
C4B-AS1	ENSG00000229776.1	2.76	11.929	-1.782	7.97e-26
C5AR1	ENSG00000197405.7	1.99	7.095	-1.437	5.08e-17
C6orf49	ENSG00000278224.4	0.38	1.865	-1.054	3.29e-32
C7	ENSG00000112936.18	76.808	562.768	-2.857	9.32e-24
C7orf50	ENSG00000146540.14	69.521	30.375	1.168	1.12e-22
C8orf4	ENSG00000176907.4	3.71	9.735	-1.188	2.52e-8
C8orf46	ENSG00000169085.11	0.56	2.31	-1.085	2.47e-22
C9orf147	ENSG00000230185.4	0.35	5.58	-2.285	7.39e-38
C9orf24	ENSG00000164972.12	0.4	2.47	-1.309	2.42e-23
C9orf3	ENSG00000148120.14	10.65	29.144	-1.372	3.66e-20
CA3	ENSG00000164879.6	0.15	1.945	-1.357	2.25e-18
CA9	ENSG00000107159.12	2.32	0.42	1.225	7.60e-12
CAB39L	ENSG00000102547.18	2.31	19.559	-2.635	4.77e-40
CABP7	ENSG00000100314.3	0.26	3.435	-1.815	5.57e-5
CACHD1	ENSG00000158966.13	2.85	9.34	-1.425	7.51e-28
CACNA1D	ENSG00000157388.13	1.83	7.725	-1.624	1.06e-19
CACNA2D4	ENSG00000151062.14	0.48	2.98	-1.427	2.16e-35
CACNB1	ENSG00000067191.15	1.43	4.04	-1.052	1.12e-18
CACNG1	ENSG00000108878.4	0	1.075	-1.053	2.54e-16
CALB1	ENSG00000104327.7	6.72	0.455	2.408	4.91e-20
CALCOCO1	ENSG00000012822.15	34.871	75.719	-1.097	6.10e-15
CALCOCO2	ENSG00000136436.14	29.06	61.245	-1.05	7.41e-17
CALD1	ENSG00000122786.19	26.8	71.125	-1.375	1.82e-22
CAMK1	ENSG00000134072.10	36.959	78.08	-1.059	8.63e-13
CAND2	ENSG00000144712.11	0.61	3.22	-1.39	7.93e-17
CAPN2	ENSG00000162909.17	54.768	125.896	-1.186	2.45e-16
CAPN3	ENSG00000092529.22	2.37	9.705	-1.667	8.22e-45
CARD10	ENSG00000100065.14	4.79	11.719	-1.135	1.83e-13
CARF	ENSG00000138380.17	1.21	3.97	-1.169	3.38e-27
CARS2	ENSG00000134905.16	23.15	49.79	-1.073	7.32e-17
CARTPT	ENSG00000164326.4	0	1.955	-1.563	3.59e-12
CASC15	ENSG00000272168.5	0.29	1.76	-1.097	3.22e-10
CASC3	ENSG00000108349.14	13.01	35.165	-1.368	1.02e-32
CAT	ENSG00000121691.4	31.449	104.223	-1.697	2.27e-23
CATSPER2	ENSG00000166762.16	1.16	4.69	-1.397	1.84e-36
CAV1	ENSG00000105974.11	10.09	4.515	1.008	1.57e-13
CBLN4	ENSG00000054803.3	0.12	6.36	-2.716	2.36e-45
CBX7	ENSG00000100307.12	9.3	23.681	-1.261	1.20e-13
CCDC14	ENSG00000175455.14	7.86	16.739	-1.002	4.70e-17
CCDC142	ENSG00000135637.13	2.03	5.75	-1.156	3.88e-31
CCDC159	ENSG00000183401.11	35.08	71.352	-1.004	9.86e-17
CCDC40	ENSG00000141519.14	1.19	4.46	-1.318	8.53e-38
CCDC57	ENSG00000176155.18	6.15	25.69	-1.9	8.41e-37
CCDC64	ENSG00000135127.11	3.72	1.28	1.05	4.49e-8
CCDC68	ENSG00000166510.13	0.16	1.68	-1.208	3.01e-38
CCDC82	ENSG00000149231.11	4.84	12.65	-1.225	1.20e-26
CCDC93	ENSG00000125633.10	6.88	18.235	-1.287	5.26e-29
CCL13	ENSG00000181374.7	0.1	2.765	-1.775	4.39e-14
CCL14	ENSG00000276409.4	26.611	70.545	-1.374	5.49e-11
CCL15-CCL14	ENSG00000275688.4	0.06	1.915	-1.459	1.51e-28
CCL2	ENSG00000108691.9	6.25	68.595	-3.263	5.74e-36
CCL21	ENSG00000137077.7	0.44	14.36	-3.415	3.01e-19
CCL23	ENSG00000274736.4	0.09	4.58	-2.356	1.17e-37
CCNA2	ENSG00000145386.9	4.16	1.25	1.197	1.48e-15
CCNB1	ENSG00000134057.14	27.72	4.92	2.278	1.01e-29
CCNB2	ENSG00000157456.7	4.83	0.76	1.728	2.98e-20
CCNE1	ENSG00000105173.13	17.44	5.825	1.434	1.66e-22
CCNG1	ENSG00000113328.18	106.557	50.355	1.067	1.93e-15
CCNL1	ENSG00000163660.11	24.421	65.231	-1.381	1.38e-27
CCNL2	ENSG00000221978.11	46.301	161.478	-1.78	2.91e-38
CCNO	ENSG00000152669.8	2.08	0.53	1.009	1.62e-16
CCR1	ENSG00000163823.3	0.63	3.355	-1.418	4.11e-18
CD14	ENSG00000170458.13	19.58	117.661	-2.528	2.97e-15
CD163	ENSG00000177575.12	9.27	109.584	-3.429	1.49e-35
CD209	ENSG00000090659.17	0.34	2.44	-1.36	6.37e-14
CD248	ENSG00000174807.3	3.56	9.49	-1.202	1.44e-7
CD300A	ENSG00000167851.13	2.1	5.22	-1.005	8.51e-9
CD302	ENSG00000241399.6	2.73	7.66	-1.215	3.36e-18
CD320	ENSG00000167775.10	79.671	37.255	1.076	7.78e-21
CD33	ENSG00000105383.14	1.04	5.325	-1.632	1.67e-18
CD36	ENSG00000135218.17	35.16	9.975	1.72	3.81e-10
CD37	ENSG00000104894.11	3.64	8.3	-1.003	8.46e-8
CD38	ENSG00000004468.12	0.2	2.165	-1.399	1.18e-27
CD4	ENSG00000010610.9	3.35	8.185	-1.078	2.74e-7
CD53	ENSG00000143119.12	6	19.229	-1.531	7.45e-16
CD55	ENSG00000196352.13	37.61	103.539	-1.437	2.85e-15
CD63	ENSG00000135404.11	2016.45	870.257	1.211	6.30e-20
CD68	ENSG00000129226.13	18.301	59.467	-1.648	2.90e-6
CD82	ENSG00000085117.11	20.069	9.36	1.024	1.67e-6
CD83	ENSG00000112149.9	15.59	5.741	1.299	1.05e-5
CD84	ENSG00000066294.14	0.24	1.69	-1.117	4.13e-23
CDC20	ENSG00000117399.13	4.94	1.34	1.344	1.20e-15
CDC25C	ENSG00000158402.18	2.13	0.195	1.389	2.25e-30
CDC34	ENSG00000099804.8	70.282	33.865	1.032	6.86e-22
CDC42EP4	ENSG00000179604.9	14.71	43.125	-1.49	5.80e-29
CDC42SE2	ENSG00000158985.13	14.98	6.425	1.106	1.56e-25
CDCA3	ENSG00000111665.11	7.78	3.195	1.066	2.36e-13
CDCA4	ENSG00000170779.10	6.84	2.055	1.36	4.63e-34
CDH12	ENSG00000154162.13	0.09	1.48	-1.186	3.07e-5
CDH13	ENSG00000140945.15	5.41	1.23	1.523	3.93e-26
CDH2	ENSG00000170558.8	1.99	48.729	-4.056	8.82e-34
CDK1	ENSG00000170312.15	11.69	1.53	2.327	5.54e-27
CDK11A	ENSG00000008128.22	14.63	40.71	-1.416	1.73e-22
CDK18	ENSG00000117266.15	2.77	11.92	-1.777	1.25e-19
CDK20	ENSG00000156345.17	6.75	16.044	-1.137	4.05e-15
CDK3	ENSG00000250506.6	2.65	6.4	-1.02	2.58e-17
CDK5RAP3	ENSG00000108465.14	52.399	106.016	-1.003	1.25e-14
CDKN1C	ENSG00000129757.12	13.44	118.61	-3.05	4.88e-22
CDKN2A	ENSG00000147889.16	22.461	7.555	1.455	7.28e-15
CDKN2D	ENSG00000129355.6	30.12	7.685	1.841	3.27e-36
CDKN3	ENSG00000100526.19	9.5	1.445	2.103	9.28e-29
CDRT4	ENSG00000239704.10	3.25	7.905	-1.067	1.53e-11
CDT1	ENSG00000167513.8	5.47	0.75	1.886	3.91e-27
CEACAM1	ENSG00000079385.21	4.88	12.245	-1.172	5.61e-10
CEACAM19	ENSG00000186567.12	2.77	6.76	-1.042	3.10e-12
CEBPD	ENSG00000221869.4	12.98	43.214	-1.661	6.08e-18
CECR7	ENSG00000237438.6	0.45	2.45	-1.251	9.40e-11
CELA1	ENSG00000139610.1	0.11	1.35	-1.082	3.08e-11
CELA2A	ENSG00000142615.7	0	3.799	-2.263	4.10e-30
CELA2B	ENSG00000215704.9	0	1.165	-1.114	1.11e-16
CELA3A	ENSG00000142789.19	0	2.95	-1.982	1.34e-28
CELA3B	ENSG00000219073.7	0	1.205	-1.141	1.10e-22
CELF1	ENSG00000149187.17	14.26	30.609	-1.051	2.96e-21
CELF6	ENSG00000140488.14	0.88	3.65	-1.306	1.53e-26
CENPF	ENSG00000117724.12	7.47	1.935	1.529	5.60e-14
CENPH	ENSG00000153044.9	6.28	1.595	1.488	2.17e-39
CENPK	ENSG00000123219.12	3.84	0.63	1.57	3.40e-27
CENPM	ENSG00000100162.14	5.61	1.26	1.548	1.06e-17
CENPN	ENSG00000166451.13	7.98	3.09	1.135	7.25e-17
CENPU	ENSG00000151725.11	7.65	1.64	1.712	1.63e-28
CENPV	ENSG00000166582.9	9.18	21.029	-1.114	1.56e-15
CENPW	ENSG00000203760.8	10.88	3.245	1.485	1.50e-28
CEP55	ENSG00000138180.15	2.54	0.525	1.215	2.23e-19
CEP95	ENSG00000258890.6	8.67	19.025	-1.05	2.14e-22
CERK	ENSG00000100422.13	8.57	18.335	-1.015	2.54e-21
CERS1	ENSG00000223802.7	2.4	0.33	1.354	7.50e-13
CES1	ENSG00000198848.12	0.78	11.286	-2.787	1.59e-7
CES4A	ENSG00000172824.14	1.23	16.85	-3.001	1.43e-57
CFAP44	ENSG00000206530.8	1.06	3.79	-1.217	2.55e-36
CFAP70	ENSG00000156042.17	2.74	8.51	-1.346	9.96e-22
CFB	ENSG00000243649.8	2.03	15.25	-2.423	3.03e-13
CFD	ENSG00000197766.7	3.77	17.421	-1.949	7.63e-21
CFH	ENSG00000000971.15	4.49	27.795	-2.391	1.95e-31
CFLAR	ENSG00000003402.19	19.65	41.996	-1.058	1.58e-23
CGNL1	ENSG00000128849.10	1.92	9.5	-1.846	6.40e-17
CH17-258A22.4	ENSG00000274615.1	1.22	5.6	-1.572	4.30e-12
CH17-431G21.1	ENSG00000274487.1	1.07	10.295	-2.448	1.66e-45
CH507-42P11.8	ENSG00000275993.2	12.26	5.295	1.075	3.43e-3
CH507-513H4.5	ENSG00000281383.1	3.97	0.425	1.802	1.38e-57
CHAD	ENSG00000136457.9	0.53	8.35	-2.611	2.74e-41
CHD7	ENSG00000171316.11	1.06	3.455	-1.113	1.34e-25
CHDH	ENSG00000016391.10	0.15	1.925	-1.347	4.31e-28
CHGA	ENSG00000100604.12	0.1	4.539	-2.332	3.64e-12
CHI3L1	ENSG00000133048.12	0.08	1.185	-1.017	2.56e-8
CHKB	ENSG00000100288.19	21.021	74.397	-1.776	3.54e-39
CHMP1B2P	ENSG00000278530.4	0.16	2.49	-1.589	9.76e-49
CHPF	ENSG00000123989.13	75.112	33.38	1.147	6.65e-16
CHRD	ENSG00000090539.15	1.1	17.685	-3.153	5.91e-49
CHRDL1	ENSG00000101938.14	0.03	1.67	-1.374	5.71e-28
CHST15	ENSG00000182022.17	1.32	7.52	-1.877	6.79e-39
CHST6	ENSG00000183196.8	0.57	5.015	-1.938	4.18e-13
CICP14	ENSG00000281490.1	1.67	8.79	-1.874	2.52e-39
CIITA	ENSG00000179583.17	0.9	3.385	-1.207	2.30e-20
CITED2	ENSG00000164442.9	28.369	90.804	-1.644	1.56e-13
CKM	ENSG00000104879.4	0.03	1.54	-1.302	1.85e-22
CKS1BP3	ENSG00000268942.2	2.49	0	1.803	1.59e-25
CKS2	ENSG00000123975.4	125.713	39.565	1.643	1.68e-21
CLASP2	ENSG00000163539.15	5.94	15.385	-1.239	2.05e-19
CLASRP	ENSG00000104859.14	25.44	56.645	-1.124	1.43e-24
CLCF1	ENSG00000175505.10	0.2	1.785	-1.215	5.80e-13
CLCN4	ENSG00000073464.11	3.42	0.965	1.17	1.28e-25
CLCN6	ENSG00000011021.21	4.02	12.565	-1.434	4.64e-40
CLDN1	ENSG00000163347.5	14.56	39.56	-1.382	2.76e-7
CLDN11	ENSG00000013297.10	0.33	3.885	-1.877	2.96e-24
CLDN7	ENSG00000181885.18	1.01	7.335	-2.052	1.01e-29
CLEC10A	ENSG00000132514.13	0.25	1.775	-1.151	1.74e-9
CLEC3B	ENSG00000163815.5	10.19	37.174	-1.77	7.11e-16
CLEC4GP1	ENSG00000268297.1	1.8	7.805	-1.653	7.66e-14
CLEC5A	ENSG00000258227.6	0.21	1.61	-1.109	4.81e-17
CLEC7A	ENSG00000172243.17	0.58	6.13	-2.174	1.86e-29
CLGN	ENSG00000153132.12	2.46	0.52	1.187	1.49e-12
CLHC1	ENSG00000162994.15	2.34	5.69	-1.002	7.67e-26
CLK2	ENSG00000176444.18	19.419	63.445	-1.658	4.98e-30
CLMP	ENSG00000166250.11	0.25	3.935	-1.981	2.68e-12
CLPS	ENSG00000137392.9	0	3.834	-2.273	7.93e-33
CMAHP	ENSG00000168405.14	2.74	12.04	-1.802	1.32e-40
CMB9-22P13.1	ENSG00000173727.11	0.93	3.045	-1.068	5.04e-19
CMC2	ENSG00000103121.8	95.009	41.43	1.178	1.39e-21
CMKLR1	ENSG00000174600.13	0.61	4.295	-1.718	5.08e-32
CNFN	ENSG00000105427.9	15.44	4.135	1.679	6.85e-30
CNN1	ENSG00000130176.7	1.83	6.975	-1.495	1.81e-19
CNN3	ENSG00000117519.15	96.301	239.934	-1.308	3.44e-17
CNR1	ENSG00000118432.12	0.74	4.195	-1.578	4.95e-11
CNTFR	ENSG00000122756.14	0.14	2.1	-1.443	1.88e-15
CNTN1	ENSG00000018236.14	0.06	1.565	-1.275	2.84e-11
CNTN6	ENSG00000134115.12	0.08	3.86	-2.17	1.60e-40
CNTNAP1	ENSG00000108797.11	0.5	3.685	-1.643	1.21e-34
COBLL1	ENSG00000082438.15	8.98	56.185	-2.519	2.68e-34
COL12A1	ENSG00000111799.20	2.43	9.89	-1.667	1.12e-19
COL15A1	ENSG00000204291.10	10.87	23.059	-1.019	2.26e-8
COL16A1	ENSG00000084636.17	2.99	15.135	-2.016	1.89e-27
COL1A1	ENSG00000108821.13	20.669	44.815	-1.08	1.80e-4
COL1A2	ENSG00000164692.17	35.16	76.391	-1.098	3.97e-6
COL26A1	ENSG00000160963.13	0.85	3.06	-1.134	1.23e-3
COL28A1	ENSG00000215018.9	0.3	1.715	-1.062	1.56e-18
COL4A3	ENSG00000169031.18	0.35	12.454	-3.317	1.36e-52
COL4A4	ENSG00000081052.11	0.23	4.285	-2.103	9.65e-53
COL6A2	ENSG00000142173.14	35.221	80.145	-1.164	3.63e-11
COL8A1	ENSG00000144810.15	1.07	5.01	-1.538	1.36e-27
COLEC11	ENSG00000118004.17	10.19	28.535	-1.4	6.72e-19
COLGALT2	ENSG00000198756.10	0.54	2.365	-1.128	7.59e-7
COPZ2	ENSG00000005243.9	9.37	36.45	-1.853	2.37e-19
CORO1A	ENSG00000102879.15	6.82	18.59	-1.325	6.50e-13
CORO2B	ENSG00000103647.12	0.31	2.725	-1.508	9.08e-39
CORO6	ENSG00000167549.18	0.68	6.439	-2.147	8.55e-39
COX4I1	ENSG00000131143.8	802.022	346.7	1.208	1.55e-26
COX4I2	ENSG00000131055.4	3.63	0.43	1.695	7.74e-48
COX6A1	ENSG00000111775.2	813.782	329.377	1.302	9.73e-26
COX6B1	ENSG00000126267.8	415.325	166.386	1.315	2.55e-35
COX7A1	ENSG00000161281.10	255.273	76.497	1.725	4.99e-12
COX7A2	ENSG00000112695.11	420.073	176.386	1.247	3.36e-23
COX7B	ENSG00000131174.4	190.651	73.572	1.362	1.02e-31
COX7C	ENSG00000127184.10	1262.09	486.214	1.374	1.83e-26
COX7CP1	ENSG00000235957.1	0	6.34	-2.876	1.33e-33
CP	ENSG00000047457.13	0.37	2.17	-1.21	1.04e-7
CPA1	ENSG00000091704.9	0.03	3.164	-2.015	1.40e-27
CPA4	ENSG00000128510.10	0.18	3.555	-1.949	1.17e-20
CPE	ENSG00000109472.13	15.46	45.089	-1.485	2.02e-13
CPNE9	ENSG00000144550.12	0.18	1.4	-1.024	1.86e-22
CPSF7	ENSG00000149532.15	17.1	46.96	-1.406	4.23e-30
CPT1A	ENSG00000110090.12	8.57	22.07	-1.269	3.48e-22
CPT1B	ENSG00000205560.12	4.73	11.725	-1.151	2.97e-16
CPXM1	ENSG00000088882.7	0.34	3.31	-1.685	1.42e-18
CRABP2	ENSG00000143320.8	13.56	4.585	1.382	7.66e-14
CRACR2B	ENSG00000177685.16	2.15	11.645	-2.005	7.06e-27
CREB3L1	ENSG00000157613.10	5.08	13.96	-1.299	1.20e-11
CREBZF	ENSG00000137504.13	13.06	32.565	-1.255	2.01e-27
CREG1	ENSG00000143162.7	41.4	112.333	-1.418	2.00e-14
CRHBP	ENSG00000145708.10	0.37	9.549	-2.945	3.63e-51
CRIPAK	ENSG00000179979.8	2.01	6.77	-1.368	4.98e-36
CRISPLD2	ENSG00000103196.11	3.21	18.28	-2.195	3.77e-39
CRLF1	ENSG00000006016.10	4.59	17.23	-1.705	9.94e-17
CRNDE	ENSG00000245694.8	6.97	2.305	1.27	3.40e-20
CROCC	ENSG00000058453.16	5.86	16.955	-1.388	3.09e-38
CROCCP2	ENSG00000282056.1	1.63	4.52	-1.07	7.91e-29
CROCCP3	ENSG00000080947.14	0.93	3.774	-1.307	7.66e-29
CRYAB	ENSG00000109846.7	18.06	68.486	-1.866	3.59e-20
CRYBB2P1	ENSG00000100058.12	4.44	12	-1.257	1.66e-20
CRYBG3	ENSG00000080200.9	1.02	3.58	-1.181	3.85e-38
CSAD	ENSG00000139631.18	13.51	34.711	-1.299	1.53e-27
CSDC2	ENSG00000172346.14	35.321	113.055	-1.651	1.35e-19
CSF1	ENSG00000184371.13	4.67	32.125	-2.547	1.87e-31
CSF1R	ENSG00000182578.13	4.19	17.79	-1.856	1.36e-14
CSF3R	ENSG00000119535.17	1.11	7.51	-2.012	4.11e-31
CSNK2B-LY6G5B-1181	ENSG00000263020.5	0.99	4.43	-1.448	2.07e-33
CSRP1	ENSG00000159176.13	20.98	57.43	-1.411	3.20e-14
CSRP2	ENSG00000175183.9	11.99	4.9	1.139	9.19e-14
CTA-276O3.4	ENSG00000235354.1	0	1.325	-1.217	4.94e-13
CTA-363E6.7	ENSG00000260934.1	1.39	0	1.257	3.46e-13
CTB-133G6.1	ENSG00000263264.1	0.05	1.225	-1.083	2.37e-15
CTB-191K22.5	ENSG00000267815.1	2.33	0.155	1.528	6.53e-23
CTB-31O20.3	ENSG00000267007.1	26.48	5.34	2.116	4.45e-14
CTB-31O20.4	ENSG00000267244.5	1.53	6.755	-1.616	1.11e-32
CTB-43P18.1	ENSG00000272742.1	18.97	2.005	2.732	1.30e-55
CTB-50E14.5	ENSG00000269374.1	1.41	5.915	-1.521	1.89e-35
CTB-63M22.1	ENSG00000229119.3	547.531	17.294	4.906	5.63e-78
CTB-79E8.3	ENSG00000253683.1	0	7.37	-3.065	1.61e-56
CTC-251I16.1	ENSG00000279496.1	0.47	2.295	-1.164	1.74e-8
CTC-255N20.1	ENSG00000250343.1	0.15	1.49	-1.115	4.91e-33
CTC-425F1.4	ENSG00000267458.1	44.261	1.59	4.127	2.94e-39
CTC-429P9.2	ENSG00000268087.1	0.76	2.605	-1.034	7.14e-25
CTC-429P9.4	ENSG00000268790.5	0.45	3.964	-1.775	4.06e-9
CTC-518P12.6	ENSG00000267484.1	9.72	0.255	3.095	2.12e-55
CTC-524C5.2	ENSG00000263272.1	1.17	4.01	-1.207	5.51e-35
CTC-529I10.1	ENSG00000275413.1	0.47	3.255	-1.533	2.23e-44
CTC1	ENSG00000178971.13	5.86	17.08	-1.398	3.15e-40
CTD-2033D15.2	ENSG00000276107.1	0.04	1.55	-1.294	2.98e-26
CTD-2033D15.3	ENSG00000278621.1	0.06	2.875	-1.87	4.88e-34
CTD-2124B8.2	ENSG00000270558.1	3.92	1.25	1.129	8.56e-37
CTD-2196E14.7	ENSG00000279618.1	0	4.055	-2.338	1.55e-18
CTD-2270P14.1	ENSG00000260565.6	2.89	7.99	-1.209	1.92e-33
CTD-2287O16.1	ENSG00000185641.6	81.712	29.535	1.438	8.62e-29
CTD-2303H24.2	ENSG00000273018.5	0.89	4.505	-1.542	3.54e-20
CTD-2311M21.2	ENSG00000260266.1	1.5	4.66	-1.179	7.90e-21
CTD-2332E11.2	ENSG00000268560.1	1.59	4.85	-1.175	2.78e-6
CTD-2369P2.12	ENSG00000267303.1	19.35	4.65	1.849	4.88e-23
CTD-2373N4.3	ENSG00000279041.1	0.27	2.2	-1.333	4.80e-60
CTD-2396E7.9	ENSG00000268203.1	8.31	2.845	1.276	1.02e-6
CTD-2510F5.6	ENSG00000265303.1	2.51	0	1.811	5.32e-17
CTD-2516F10.2	ENSG00000251364.6	0.29	2.245	-1.331	1.50e-38
CTD-2517M22.14	ENSG00000255182.2	1.4	4.35	-1.156	3.32e-28
CTD-2527I21.14	ENSG00000271032.1	0.12	1.625	-1.229	1.17e-50
CTD-2537I9.12	ENSG00000267523.1	2.44	19.044	-2.543	3.54e-57
CTD-2540B15.11	ENSG00000267580.1	5.88	1.63	1.387	1.72e-21
CTD-2540B15.13	ENSG00000273420.1	51.228	25.095	1.001	4.11e-8
CTD-2545G14.4	ENSG00000279812.1	0	6.25	-2.858	1.06e-29
CTD-2619J13.14	ENSG00000232098.3	3.85	9.115	-1.06	1.11e-16
CTD-2647L4.4	ENSG00000259366.1	1.04	5.955	-1.769	2.23e-42
CTD-3088G3.8	ENSG00000188897.8	2.7	0.36	1.444	1.50e-20
CTD-3157E16.1	ENSG00000265519.1	0.97	4.135	-1.382	1.13e-21
CTD-3199J23.6	ENSG00000267681.1	0.71	2.485	-1.027	6.43e-23
CTDSP2	ENSG00000175215.9	35.4	79.61	-1.147	1.14e-10
CTF1	ENSG00000150281.6	1.75	6.895	-1.521	1.15e-17
CTGF	ENSG00000118523.5	10.03	31.418	-1.555	5.94e-15
CTGLF12P	ENSG00000265018.6	0.69	3.135	-1.291	4.32e-12
CTNNBL1	ENSG00000132792.18	39.36	17.7	1.11	1.26e-33
CTNS	ENSG00000040531.14	6.26	15.695	-1.201	1.31e-25
CTRB1	ENSG00000168925.10	0.28	3.259	-1.735	3.49e-8
CTRB2	ENSG00000168928.12	0.26	3.643	-1.882	1.04e-13
CTSK	ENSG00000143387.12	3.39	9.15	-1.209	4.46e-15
CTSV	ENSG00000136943.10	1.84	0.185	1.261	2.84e-28
CTTN	ENSG00000085733.15	74.15	195.015	-1.383	2.46e-39
CUEDC1	ENSG00000180891.12	11.95	25.704	-1.044	1.93e-20
CWC25	ENSG00000273559.4	5.8	15.74	-1.3	8.20e-40
CXCL12	ENSG00000107562.16	3.27	33.344	-3.008	8.99e-34
CXCL2	ENSG00000081041.8	0.65	4.18	-1.65	1.76e-13
CXXC1	ENSG00000154832.14	29.25	73.259	-1.296	1.31e-27
CYB561	ENSG00000008283.15	13.98	30.609	-1.077	4.82e-13
CYB561A3	ENSG00000162144.9	38.419	378.263	-3.266	3.75e-30
CYB561D1	ENSG00000174151.14	2.69	6.425	-1.009	1.35e-15
CYB5A	ENSG00000166347.18	31.449	93.198	-1.538	1.92e-10
CYB5D1	ENSG00000182224.11	5.07	12.59	-1.163	1.53e-28
CYB5RL	ENSG00000215883.9	1.28	3.63	-1.022	1.09e-22
CYBA	ENSG00000051523.10	22.65	58.716	-1.336	2.53e-9
CYBB	ENSG00000165168.7	1.26	8.485	-2.069	1.12e-18
CYBRD1	ENSG00000071967.11	12.35	52.897	-2.013	6.01e-28
CYP11B1	ENSG00000160882.11	117.441	3355.01	-4.825	5.32e-27
CYP11B2	ENSG00000179142.2	0.76	24.403	-3.851	1.74e-20
CYP17A1	ENSG00000148795.5	2596.58	6948.09	-1.42	1.64e-11
CYP1B1	ENSG00000138061.11	1.08	5.83	-1.715	1.58e-16
CYP21A1P	ENSG00000204338.8	33.69	83.882	-1.291	3.83e-7
CYP21A2	ENSG00000231852.6	947.182	1930.96	-1.027	2.72e-7
CYP26B1	ENSG00000003137.8	0.62	2.29	-1.022	1.98e-5
CYP2C8	ENSG00000138115.13	0.51	2.605	-1.255	1.98e-23
CYP2D7	ENSG00000205702.10	0.54	2.34	-1.117	2.83e-28
CYP4B1	ENSG00000142973.12	0.11	2.56	-1.681	2.11e-24
CYP4F11	ENSG00000171903.16	0.4	2.215	-1.199	7.05e-4
CYP4F12	ENSG00000186204.14	0.27	3.73	-1.897	1.84e-26
CYP4F29P	ENSG00000228314.1	0.15	1.445	-1.088	3.82e-3
CYP51A1	ENSG00000001630.15	79.959	30.65	1.355	5.15e-8
CYR61	ENSG00000142871.15	13.76	33.793	-1.237	3.20e-8
CYSLTR2	ENSG00000152207.7	1.59	5.205	-1.261	8.00e-3
CYTH4	ENSG00000100055.20	1.82	6.4	-1.392	1.93e-25
D2HGDH	ENSG00000180902.16	13.29	29.09	-1.074	4.53e-22
DAAM2	ENSG00000146122.16	2.33	17.35	-2.462	8.76e-29
DACH1	ENSG00000276644.4	0.48	3.265	-1.527	3.09e-8
DAPK1	ENSG00000196730.12	1.18	3.955	-1.185	3.56e-9
DAPL1	ENSG00000163331.10	0.07	22.71	-4.47	2.11e-32
DBH	ENSG00000123454.10	0.03	1.31	-1.165	5.01e-14
DBH-AS1	ENSG00000225756.1	0.13	2.5	-1.631	4.12e-40
DBP	ENSG00000105516.10	110.852	39.155	1.478	2.94e-17
DCAF6	ENSG00000143164.15	21.201	50.67	-1.219	6.37e-16
DCAF8	ENSG00000132716.18	38.88	90.65	-1.2	1.55e-19
DCN	ENSG00000011465.16	15.33	459.078	-4.816	8.01e-37
DCUN1D3	ENSG00000188215.9	2.64	7.06	-1.147	3.56e-23
DDHD2	ENSG00000085788.13	8.19	18.415	-1.079	2.87e-13
DDI2	ENSG00000197312.11	1.68	5.35	-1.245	6.13e-43
DDIT3	ENSG00000175197.10	100.37	35.131	1.488	2.34e-12
DDIT4L	ENSG00000145358.6	3.44	0.42	1.645	1.08e-16
DDR2	ENSG00000162733.16	17.48	58.918	-1.697	1.76e-20
DDX11L2	ENSG00000236397.3	0.25	2.225	-1.367	1.52e-22
DDX17	ENSG00000100201.18	58.761	223.719	-1.911	8.55e-37
DDX3Y	ENSG00000067048.16	0.01	28.327	-4.86	3.89e-7
DDX5	ENSG00000108654.11	228.38	583.443	-1.349	8.55e-21
DENND2D	ENSG00000162777.16	8.91	19.265	-1.032	3.24e-16
DENND3	ENSG00000105339.10	2.49	13.365	-2.041	2.98e-47
DENND4B	ENSG00000198837.9	10.69	28.561	-1.338	3.86e-24
DEPDC1B	ENSG00000035499.12	2.22	0.19	1.436	3.80e-35
DEPTOR	ENSG00000155792.9	8.29	40.339	-2.154	2.80e-28
DES	ENSG00000175084.11	0.08	7.625	-2.997	4.44e-47
DFNA5	ENSG00000105928.13	14.87	3.53	1.809	1.56e-18
DFNB31	ENSG00000095397.13	33.07	96.305	-1.514	5.26e-24
DFNB59	ENSG00000204311.11	0.86	2.85	-1.05	6.47e-26
DGAT1	ENSG00000185000.9	47.389	129.176	-1.428	7.37e-20
DGKA	ENSG00000065357.19	7.57	19.745	-1.275	8.11e-18
DGUOK-AS1	ENSG00000237883.1	0.2	2.54	-1.561	1.30e-42
DHCR7	ENSG00000172893.15	113.087	51.983	1.107	4.60e-4
DHRS1	ENSG00000157379.13	11.52	27.965	-1.21	1.25e-27
DHRS11	ENSG00000278535.4	4.55	10.24	-1.018	1.38e-20
DHRS2	ENSG00000100867.14	4.33	0.51	1.82	1.95e-13
DIO3OS	ENSG00000258498.6	0.19	3.7	-1.982	1.04e-32
DIP2A	ENSG00000160305.17	7.44	16.005	-1.011	3.28e-25
DIRC3	ENSG00000231672.6	0.21	1.485	-1.038	1.16e-34
DIXDC1	ENSG00000150764.13	4.83	10.689	-1.004	3.53e-12
DKK3	ENSG00000050165.17	7.52	42.535	-2.353	4.87e-18
DLEU1_1	ENSG00000276089.1	0	1.41	-1.269	1.23e-4
DLG2	ENSG00000150672.16	0.6	8.165	-2.518	8.63e-46
DLG4	ENSG00000132535.18	10.95	24.855	-1.113	3.50e-15
DLG5	ENSG00000151208.16	25.16	53.824	-1.067	6.58e-14
DLGAP1	ENSG00000170579.14	0.06	1.83	-1.417	1.62e-13
DLGAP1-AS1	ENSG00000177337.7	7.35	24.634	-1.618	2.72e-29
DLGAP1-AS2	ENSG00000262001.1	1.7	4.665	-1.069	8.21e-23
DLK1	ENSG00000185559.13	4248.39	1066.12	1.994	8.33e-3
DLL4	ENSG00000128917.6	5.62	1.225	1.573	6.30e-29
DLX5	ENSG00000105880.4	3	0.13	1.824	3.81e-32
DMD	ENSG00000198947.14	3.23	9.085	-1.253	4.98e-19
DMGDH	ENSG00000132837.14	1.24	4.85	-1.385	1.78e-23
DMPK	ENSG00000104936.17	43.149	112.739	-1.365	2.21e-14
DMTF1	ENSG00000135164.18	14.98	36.789	-1.242	9.83e-30
DNAH1	ENSG00000114841.17	2.11	5.935	-1.157	2.20e-32
DNAJA4	ENSG00000140403.12	6.14	16.429	-1.288	9.76e-21
DNAJB4	ENSG00000162616.8	11.87	29.709	-1.255	2.58e-23
DNAJC1	ENSG00000136770.10	33.139	15.135	1.081	7.43e-22
DNAJC12	ENSG00000108176.14	15.29	37.994	-1.259	9.28e-14
DNAJC19P9	ENSG00000258608.1	3.14	0.66	1.318	8.11e-34
DNAJC9-AS1	ENSG00000236756.4	3.33	0.36	1.671	6.50e-14
DNALI1	ENSG00000163879.10	3.86	11.475	-1.36	4.02e-22
DNASE1L3	ENSG00000163687.13	2.75	27.51	-2.926	2.64e-34
DNER	ENSG00000187957.7	25.77	61.612	-1.226	5.76e-13
DNHD1	ENSG00000179532.12	1.56	7.655	-1.757	3.03e-46
DNM1	ENSG00000106976.18	1.17	6.985	-1.88	8.55e-13
DNM3OS	ENSG00000230630.2	0.09	1.57	-1.237	3.97e-46
DOCK10	ENSG00000135905.18	2.96	8.62	-1.281	6.38e-15
DOCK2	ENSG00000134516.15	1.45	4.13	-1.066	1.74e-13
DOCK4	ENSG00000128512.19	1.62	4.82	-1.151	1.98e-27
DOCK9	ENSG00000088387.17	6.58	20.295	-1.49	1.07e-28
DOK2	ENSG00000147443.12	0.94	4.729	-1.562	6.82e-21
DOK3	ENSG00000146094.13	2.07	6.115	-1.213	3.55e-19
DOPEY1	ENSG00000083097.14	2.68	6.51	-1.029	1.16e-31
DPH1	ENSG00000108963.17	15.36	48.701	-1.603	1.16e-42
DPP10	ENSG00000175497.16	2.4	7.935	-1.394	3.91e-14
DPT	ENSG00000143196.4	0.23	4.59	-2.184	1.85e-19
DPYD	ENSG00000188641.12	3.18	8.57	-1.195	4.63e-17
DPYS	ENSG00000147647.12	1.87	21.59	-2.977	1.68e-35
DSE	ENSG00000111817.16	2.71	8.73	-1.391	8.30e-32
DTL	ENSG00000143476.17	1.66	0.315	1.016	9.86e-20
DUOX1	ENSG00000137857.17	0.18	15.16	-3.776	1.06e-65
DUOXA1	ENSG00000140254.12	0.05	3.589	-2.128	3.63e-53
DUSP15	ENSG00000149599.15	14.2	5.33	1.264	6.11e-14
DUSP2	ENSG00000158050.4	4	1.02	1.308	2.60e-15
DUSP26	ENSG00000133878.8	2.05	21.17	-2.862	1.24e-27
DUSP5	ENSG00000138166.5	19.631	8.19	1.167	4.71e-3
DUSP8P5	ENSG00000235316.1	0.47	2.325	-1.178	4.47e-43
DVL2	ENSG00000004975.11	13.32	29.579	-1.095	1.73e-17
DXO	ENSG00000204348.9	15.53	32.134	-1.003	8.64e-16
DYNLL1	ENSG00000088986.10	534.075	218.789	1.284	2.17e-19
E2F1	ENSG00000101412.12	11.29	4.025	1.29	1.55e-21
EBF4	ENSG00000088881.20	1.89	5.59	-1.189	9.71e-16
EBP	ENSG00000147155.10	340.496	161.887	1.068	3.38e-8
ECHDC2	ENSG00000121310.16	39.89	168.522	-2.052	1.60e-43
ECHDC3	ENSG00000134463.14	2.57	24.909	-2.859	2.50e-23
ECM1	ENSG00000143369.14	5.87	13.1	-1.037	2.05e-5
EDA	ENSG00000158813.17	18.75	6.405	1.415	4.66e-24
EDIL3	ENSG00000164176.12	1.44	6.61	-1.641	1.90e-8
EDNRB	ENSG00000136160.14	5.76	15.335	-1.273	2.87e-13
EEF1A1P19	ENSG00000249855.1	1.78	0.325	1.069	4.53e-44
EEF1A1P6	ENSG00000233476.3	22.33	7.95	1.382	1.33e-19
EEF1A1P9	ENSG00000249264.1	1.65	0.185	1.161	2.23e-50
EFCAB2	ENSG00000203666.12	6.27	13.989	-1.044	1.03e-20
EFEMP1	ENSG00000115380.18	11.64	46.261	-1.903	1.47e-13
EFEMP2	ENSG00000172638.12	10.13	34.635	-1.679	4.75e-17
EFHC1	ENSG00000096093.14	2.18	7.315	-1.387	6.06e-39
EFNA3	ENSG00000143590.13	9.2	1.8	1.865	8.51e-24
EFS	ENSG00000100842.12	0.22	2.69	-1.597	7.32e-33
EGFL8	ENSG00000241404.6	4.95	11.24	-1.041	6.58e-18
EGFLAM	ENSG00000164318.17	0.79	7.48	-2.244	1.05e-34
EGFR	ENSG00000146648.15	4.1	10.285	-1.146	2.95e-11
EGLN3	ENSG00000129521.13	2.5	0.51	1.213	4.80e-18
EGR1	ENSG00000120738.7	17.19	37.106	-1.067	6.20e-7
EHBP1L1	ENSG00000173442.11	3.97	19.434	-2.04	8.94e-37
EHD3	ENSG00000013016.14	1.41	5.585	-1.45	1.65e-28
EIF1AY	ENSG00000198692.9	0.04	19.337	-4.289	2.75e-5
EIF2D	ENSG00000143486.15	15.94	33.669	-1.033	1.21e-19
EIF3C	ENSG00000184110.14	393.657	181.861	1.11	2.23e-14
EIF5	ENSG00000100664.10	40.439	96.035	-1.228	2.53e-15
EIF5AP4	ENSG00000234743.1	4.9	0.185	2.316	6.59e-77
ELL3	ENSG00000128886.11	1.08	4.305	-1.351	1.40e-28
ELMOD3	ENSG00000115459.17	8.68	20.175	-1.129	3.47e-25
ELMSAN1	ENSG00000156030.12	3.69	8.995	-1.092	1.02e-27
ELN	ENSG00000049540.16	1.56	9.92	-2.093	4.92e-19
ELOVL4	ENSG00000118402.5	1.6	0.22	1.092	3.07e-18
EMB	ENSG00000170571.11	4.08	15.23	-1.676	2.22e-7
EMCN	ENSG00000164035.9	3.47	10.29	-1.337	2.27e-15
EME2	ENSG00000197774.12	4.05	13.27	-1.499	4.81e-33
EMILIN1	ENSG00000138080.13	6.01	39.925	-2.545	5.17e-28
EMILIN2	ENSG00000132205.10	1.58	4.235	-1.021	3.80e-6
EML2	ENSG00000125746.14	20.04	51.594	-1.322	1.37e-13
EML3	ENSG00000149499.11	8.95	35.355	-1.869	1.70e-37
EML4	ENSG00000143924.18	5.93	17.76	-1.437	6.14e-23
EMP1	ENSG00000134531.9	7.52	18.955	-1.228	6.28e-14
ENAH	ENSG00000154380.16	9.4	28.739	-1.516	2.81e-20
ENC1	ENSG00000171617.13	8.96	1.575	1.952	1.72e-24
ENG	ENSG00000106991.13	30.93	75.006	-1.251	1.08e-21
ENGASE	ENSG00000167280.16	6.65	31.745	-2.098	1.75e-53
ENO3	ENSG00000108515.17	3.76	9.45	-1.135	6.42e-18
ENOSF1	ENSG00000132199.18	23.54	67.923	-1.49	6.05e-29
FGR	ENSG00000000938.12	1.29	6.29	-1.671	4.69e-35
TMEM176A	ENSG00000002933.7	6.34	18.908	-1.44	1.49e-5
RBM5	ENSG00000003756.16	30.549	88.214	-1.5	2.02e-33
SLC7A2	ENSG00000003989.16	0.92	4.58	-1.539	6.08e-15
SARM1	ENSG00000004139.13	3.52	9.42	-1.205	1.90e-22
RBM6	ENSG00000004534.14	28.111	76.261	-1.408	2.48e-27
PDK4	ENSG00000004799.7	56.92	162.066	-1.493	6.48e-8
HOXA11	ENSG00000005073.5	2.29	0.475	1.157	3.25e-15
PON1	ENSG00000005421.8	0.15	5.014	-2.387	8.72e-17
PDK2	ENSG00000005882.11	31.36	84.723	-1.405	4.35e-15
ITGA3	ENSG00000005884.17	17.881	39.62	-1.105	1.61e-9
TMEM132A	ENSG00000006118.14	66.842	13.45	2.231	1.16e-33
TAC1	ENSG00000006128.11	0.05	2.58	-1.77	6.50e-24
SPATA20	ENSG00000006282.19	36.63	78.457	-1.078	1.41e-16
TNFRSF12A	ENSG00000006327.13	122.802	27.46	2.121	6.63e-19
GAS7	ENSG00000007237.18	0.45	3.065	-1.487	4.90e-17
RHBDF1	ENSG00000007384.15	3.97	10.63	-1.227	5.36e-16
TEAD3	ENSG00000007866.18	1.85	6.71	-1.436	1.16e-26
FMO3	ENSG00000007933.12	0.55	4.025	-1.697	1.15e-15
MYLIP	ENSG00000007944.14	2.83	13.58	-1.929	8.84e-26
SPAG9	ENSG00000008294.20	7.82	23.715	-1.487	5.25e-33
MGST1	ENSG00000008394.12	415.757	1011.62	-1.281	2.94e-11
IL32	ENSG00000008517.16	52.548	21.274	1.265	2.03e-6
MAPK8IP2	ENSG00000008735.13	2.19	8.709	-1.606	1.01e-17
HEATR5B	ENSG00000008869.11	3.22	7.885	-1.074	1.39e-29
MLXIPL	ENSG00000009950.15	12.14	102.447	-2.977	1.39e-31
NISCH	ENSG00000010322.15	25.17	68.604	-1.411	1.52e-31
STAB1	ENSG00000010327.10	24.511	159.879	-2.657	9.19e-33
HIVEP2	ENSG00000010818.8	1.63	4.375	-1.031	5.45e-29
FMO1	ENSG00000010932.15	0.41	4.785	-2.037	1.09e-14
MRC2	ENSG00000011028.13	2.5	10.44	-1.709	2.83e-9
SYT7	ENSG00000011347.9	2.46	0.365	1.342	1.56e-11
PIK3C2A	ENSG00000011405.13	4.56	10.145	-1.003	1.16e-22
SEMA3B	ENSG00000012171.17	34.47	196.304	-2.476	3.27e-29
KDM5D	ENSG00000012817.15	0.02	34.93	-5.139	5.81e-9
PGM3	ENSG00000013375.15	8.56	18.155	-1.003	1.73e-18
RWDD2A	ENSG00000013392.7	2.01	5.29	-1.063	4.26e-30
MTMR11	ENSG00000014914.19	16.58	36.015	-1.074	4.41e-11
WAS	ENSG00000015285.10	1.69	5.65	-1.306	4.95e-19
IGF1	ENSG00000017427.15	0.67	3.764	-1.512	1.51e-21
RUFY3	ENSG00000018189.12	18.17	46.584	-1.312	5.69e-23
SLC11A1	ENSG00000018280.16	1.19	27.916	-3.723	1.28e-59
MARCO	ENSG00000019169.10	0.21	13.045	-3.537	6.62e-29
HGF	ENSG00000019991.15	0.59	7.838	-2.475	1.80e-29
ZRANB1	ENSG00000019995.6	4.46	12.979	-1.356	2.11e-20
OSBPL5	ENSG00000021762.19	3.26	8.975	-1.227	1.06e-27
FHL1	ENSG00000022267.16	7.56	21.97	-1.424	1.55e-16
PLEKHO1	ENSG00000023902.13	18.911	45.959	-1.238	3.11e-12
GCLM	ENSG00000023909.9	5.02	17.355	-1.608	1.63e-24
NR1H3	ENSG00000025434.18	5.33	30.25	-2.304	1.25e-35
TYMP	ENSG00000025708.12	6.02	27.925	-2.043	3.71e-19
TOMM34	ENSG00000025772.7	72.509	34.495	1.05	7.09e-14
FAS	ENSG00000026103.19	12.12	25.889	-1.035	2.26e-9
KCNG1	ENSG00000026559.13	1.57	0.08	1.251	2.40e-8
HMGB3	ENSG00000029993.14	31.219	11.375	1.38	2.95e-23
TIMP2	ENSG00000035862.12	56.539	125.582	-1.137	4.37e-9
TUBG2	ENSG00000037042.8	11.96	38.965	-1.625	1.26e-37
FLT4	ENSG00000037280.15	2.85	9.355	-1.427	3.16e-30
MRI1	ENSG00000037757.13	8.09	23.75	-1.445	2.61e-25
HOXC8	ENSG00000037965.5	0.63	2.68	-1.175	8.00e-22
VCAN	ENSG00000038427.15	2.73	18.56	-2.391	4.31e-16
MSR1	ENSG00000038945.14	2.28	8.429	-1.523	9.54e-19
INPP4A	ENSG00000040933.15	2.82	9.295	-1.43	1.21e-35
PARP3	ENSG00000041880.14	18.199	42.07	-1.166	2.17e-19
FAM65C	ENSG00000042062.11	0.63	17.105	-3.473	2.45e-47
RETSAT	ENSG00000042445.13	25.44	64.85	-1.316	1.01e-18
TG	ENSG00000042832.11	0.58	3.13	-1.386	1.20e-19
LCP2	ENSG00000043462.11	2.72	8.925	-1.416	6.90e-22
GPM6B	ENSG00000046653.14	0.2	1.43	-1.018	1.93e-19
FAM214A	ENSG00000047346.12	12.69	30.505	-1.202	6.79e-18
LMO3	ENSG00000048540.14	0.86	4.125	-1.462	1.31e-7
H6PD	ENSG00000049239.12	10.79	23.765	-1.071	5.11e-19
EPN3	ENSG00000049283.17	1.02	13.12	-2.805	2.38e-15
NEDD4L	ENSG00000049759.16	5.38	14.285	-1.26	1.12e-18
LIMA1	ENSG00000050405.13	13.21	40.005	-1.529	1.17e-23
LAMC3	ENSG00000050555.17	8.77	21.85	-1.226	2.88e-3
PTGER3	ENSG00000050628.20	0.66	2.42	-1.043	6.91e-3
FAM160A2	ENSG00000051009.10	14.47	31.11	-1.054	1.35e-23
THOC3	ENSG00000051596.9	57.859	13.35	2.036	2.37e-36
PLEKHA5	ENSG00000052126.14	13.38	48.77	-1.791	2.03e-16
MSMO1	ENSG00000052802.12	213.027	45.825	2.192	8.12e-10
MCF2L2	ENSG00000053524.11	2.58	6.355	-1.039	2.80e-15
KCNQ1	ENSG00000053918.15	11.13	161.086	-3.74	1.53e-51
PHPT1	ENSG00000054148.17	250.244	122.81	1.021	4.38e-20
HHAT	ENSG00000054392.12	1.47	5.175	-1.322	7.83e-28
PLEKHH1	ENSG00000054690.13	6.47	17.76	-1.328	7.51e-30
KCNH2	ENSG00000055118.14	12.88	2.02	2.2	6.41e-15
MCOLN3	ENSG00000055732.12	10.8	50.075	-2.114	2.12e-21
ITIH4	ENSG00000055955.15	1.68	28.464	-3.459	3.12e-42
TRAF1	ENSG00000056558.10	2.85	7.49	-1.141	3.56e-22
MTA3	ENSG00000057935.13	22.221	51.31	-1.172	2.78e-22
USP13	ENSG00000058056.8	2.92	10.275	-1.524	9.81e-28
UNKL	ENSG00000059145.18	5.79	21.795	-1.747	1.43e-24
TBXAS1	ENSG00000059377.15	2.78	8.29	-1.297	2.58e-16
TARBP1	ENSG00000059588.9	4.6	13.48	-1.371	9.59e-28
TNK2	ENSG00000061938.16	7.69	16.6	-1.018	1.26e-24
ISOC2	ENSG00000063241.7	109.47	46.92	1.205	7.28e-26
LIMCH1	ENSG00000064042.17	6.4	21.505	-1.605	6.90e-24
TM7SF3	ENSG00000064115.10	22.88	50.327	-1.104	1.48e-13
NGFR	ENSG00000064300.8	2.17	14.709	-2.309	6.68e-35
RFXANK	ENSG00000064490.13	74.821	35.341	1.061	9.36e-21
ZNF76	ENSG00000065029.14	15.93	45.781	-1.466	1.35e-34
SLC9A3R2	ENSG00000065054.13	27.119	57.47	-1.056	1.31e-16
MYLK	ENSG00000065534.18	2.95	11.935	-1.711	4.28e-27
TLE2	ENSG00000065717.14	4.72	30.124	-2.444	1.98e-47
ME1	ENSG00000065833.8	18.63	40.495	-1.08	1.00e-8
MTHFD2	ENSG00000065911.11	14.78	6.59	1.056	1.86e-5
PDE4A	ENSG00000065989.15	0.95	4.64	-1.532	2.11e-32
KDM4A	ENSG00000066135.12	9.16	19.725	-1.028	6.51e-18
NGEF	ENSG00000066248.14	7.47	41.37	-2.323	3.61e-14
SPI1	ENSG00000066336.11	5.43	15.765	-1.383	5.56e-14
FGFR2	ENSG00000066468.20	3.59	14.305	-1.737	6.96e-24
FECH	ENSG00000066926.10	6.47	18.255	-1.366	3.56e-19
PFKP	ENSG00000067057.16	29.3	9.625	1.512	8.14e-8
PHKA1	ENSG00000067177.14	5.84	15.475	-1.268	1.66e-17
EVI5	ENSG00000067208.14	2.75	6.95	-1.084	1.02e-25
TRO	ENSG00000067445.20	1.36	4.175	-1.133	1.12e-8
ZFY	ENSG00000067646.11	0	1.534	-1.341	5.63e-6
NAV3	ENSG00000067798.13	0.23	3.63	-1.912	4.84e-36
ROCK1	ENSG00000067900.6	3.42	9.23	-1.211	2.82e-31
HDAC4	ENSG00000068024.16	2.21	6.71	-1.264	1.08e-37
IFI35	ENSG00000068079.7	17.89	42.26	-1.195	1.95e-16
TTC7A	ENSG00000068724.15	11.03	27.775	-1.258	3.12e-25
IP6K2	ENSG00000068745.14	39.229	85.165	-1.099	2.52e-18
RASGRP2	ENSG00000068831.18	2.06	11.639	-2.046	3.19e-45
PYGM	ENSG00000068976.13	0.42	2.325	-1.227	2.79e-16
RORA	ENSG00000069667.15	6.51	21.48	-1.582	2.07e-20
RAB27A	ENSG00000069974.15	8.33	22.845	-1.354	2.86e-15
IKBKAP	ENSG00000070061.14	33.451	73.444	-1.112	3.76e-11
NUCB2	ENSG00000070081.15	93.169	42.939	1.1	6.09e-16
SMG6	ENSG00000070366.13	12.59	27.02	-1.044	3.39e-24
FSTL3	ENSG00000070404.9	35.121	94.264	-1.399	1.64e-14
PTPN21	ENSG00000070778.12	1.95	5.29	-1.092	1.84e-27
VASH1	ENSG00000071246.10	6.34	17.02	-1.296	2.70e-16
WBSCR22	ENSG00000071462.11	105.047	50.345	1.046	2.41e-25
PRKACA	ENSG00000072062.13	223.231	109.656	1.019	1.24e-12
PTPN18	ENSG00000072135.12	8.15	21.33	-1.287	1.06e-21
LIMS2	ENSG00000072163.18	4.75	17.709	-1.702	3.88e-40
SREBF1	ENSG00000072310.16	64.91	445.644	-2.761	4.69e-37
HMMR	ENSG00000072571.19	2.25	0.525	1.092	2.69e-17
P4HA2	ENSG00000072682.18	24.75	7.92	1.529	2.75e-17
FCGR2B	ENSG00000072694.18	1.1	4.009	-1.254	2.72e-9
EVC	ENSG00000072840.12	0.9	2.94	-1.052	5.34e-18
MRVI1	ENSG00000072952.18	1.83	5.84	-1.273	5.42e-30
IGF2BP2	ENSG00000073792.15	0.55	8.755	-2.654	1.64e-19
PPP2R2C	ENSG00000074211.13	2.38	0.185	1.512	3.93e-10
TEAD2	ENSG00000074219.13	5.39	13.845	-1.216	1.03e-14
ZNF532	ENSG00000074657.13	2.57	8.09	-1.348	7.46e-30
ZZEF1	ENSG00000074755.14	4.43	14.745	-1.536	3.21e-42
TTC38	ENSG00000075234.16	10.49	24.035	-1.124	4.95e-26
FOSL2	ENSG00000075426.11	36.74	110.998	-1.569	1.93e-24
FSCN1	ENSG00000075618.17	109.728	36.206	1.573	1.27e-8
PLD1	ENSG00000075651.15	7.24	25.038	-1.66	1.22e-25
SEC31B	ENSG00000075826.16	2.06	11.11	-1.985	7.21e-48
PTPN23	ENSG00000076201.14	10.36	22.455	-1.046	1.29e-21
RGS11	ENSG00000076344.15	0.53	3.515	-1.561	6.11e-16
GPC4	ENSG00000076716.8	2.24	5.575	-1.021	5.01e-8
NMRK2	ENSG00000077009.13	2.39	0.59	1.092	2.22e-10
UBE2T	ENSG00000077152.9	13.64	3.605	1.669	3.26e-24
PPP1R12B	ENSG00000077157.20	1.86	5.945	-1.28	1.78e-38
IL4R	ENSG00000077238.13	4.38	32.065	-2.62	9.13e-44
FAM76B	ENSG00000077458.12	3.68	13.505	-1.632	1.44e-40
NAALAD2	ENSG00000077616.10	2.7	9.01	-1.436	2.24e-15
FGFR1	ENSG00000077782.19	27.98	12.975	1.052	3.58e-8
FBLN1	ENSG00000077942.17	4.48	97.369	-4.166	9.56e-39
ITGA8	ENSG00000077943.7	1.01	4.31	-1.401	1.54e-22
SYNJ2	ENSG00000078269.13	1.45	4.215	-1.09	2.30e-26
HOXA9	ENSG00000078399.15	2.7	6.42	-1.004	7.13e-7
ITM2A	ENSG00000078596.10	1.92	5.29	-1.107	1.07e-16
THOC1	ENSG00000079134.11	9.02	19.51	-1.033	2.82e-28
OSBPL6	ENSG00000079156.16	2.09	0.2	1.365	6.03e-29
LXN	ENSG00000079257.7	7.91	32.112	-1.894	1.01e-23
MKNK1	ENSG00000079277.19	8.72	31.501	-1.741	6.04e-43
TNS1	ENSG00000079308.16	16.27	51.585	-1.606	1.06e-29
LIPE	ENSG00000079435.9	62.318	26.974	1.179	9.16e-5
FDFT1	ENSG00000079459.12	186.146	89.123	1.054	8.84e-3
KIF22	ENSG00000079616.12	38.18	16.515	1.162	1.38e-29
PGM1	ENSG00000079739.15	27.249	62.37	-1.166	1.39e-14
EPB41L2	ENSG00000079819.16	8.49	23.855	-1.389	5.81e-24
MOXD1	ENSG00000079931.14	2.99	15.754	-2.07	3.79e-15
RABL2B	ENSG00000079974.17	6.69	17.94	-1.3	1.35e-30
SRCAP	ENSG00000080603.16	3.18	15.665	-1.995	6.66e-24
KCNN2	ENSG00000080709.14	5.22	23.35	-1.969	3.84e-14
NDC80	ENSG00000080986.12	2.27	0.47	1.153	2.88e-20
PTPRC	ENSG00000081237.18	0.7	3.635	-1.447	1.55e-20
UBA5	ENSG00000081307.12	15.11	36.231	-1.209	1.83e-26
PHLPP1	ENSG00000081913.13	4.94	12.355	-1.169	1.55e-14
STRADB	ENSG00000082146.12	20.75	57.396	-1.425	9.37e-19
EPB41L3	ENSG00000082397.15	15.65	45.61	-1.485	4.13e-23
KCNK2	ENSG00000082482.13	0.9	34.495	-4.224	1.15e-43
MRPL22	ENSG00000082515.16	83.94	41.106	1.012	4.51e-27
ULK2	ENSG00000083290.19	2.93	7.315	-1.081	9.47e-24
FAT1	ENSG00000083857.13	9.39	2.025	1.78	2.66e-18
NKAIN1	ENSG00000084628.9	1.12	5.02	-1.506	4.90e-12
GCKR	ENSG00000084734.8	1.08	12.649	-2.714	1.63e-52
WNT11	ENSG00000085741.12	6.11	13.43	-1.021	3.90e-8
TTC39A	ENSG00000085831.15	2.82	7.24	-1.109	6.41e-8
FOLH1	ENSG00000086205.16	2.82	0.28	1.577	2.61e-26
LAT2	ENSG00000086730.16	2.13	5.32	-1.014	4.79e-10
TRIP6	ENSG00000087077.11	26.53	54.129	-1.002	1.75e-11
NLK	ENSG00000087095.12	9.81	23.585	-1.185	4.14e-14
MMP2	ENSG00000087245.12	4.91	46.62	-3.01	1.49e-40
MT3	ENSG00000087250.8	614.981	44.985	3.744	8.65e-18
SH3BP2	ENSG00000087266.15	5.38	14.91	-1.318	3.14e-15
ERGIC2	ENSG00000087502.17	57.899	21.905	1.363	5.61e-22
TPX2	ENSG00000088325.15	8.39	1.065	2.185	3.71e-33
FER1L4	ENSG00000088340.15	1.03	3.405	-1.118	2.23e-6
PDRG1	ENSG00000088356.5	23.65	9.99	1.165	7.72e-26
SIGLEC1	ENSG00000088827.12	0.78	9.205	-2.519	3.47e-31
SLC4A11	ENSG00000088836.12	1.06	5.555	-1.67	3.81e-30
TESC	ENSG00000088992.17	15.04	42.07	-1.425	1.89e-14
SLC23A2	ENSG00000089057.14	26.451	58.468	-1.115	4.02e-12
GRAMD1A	ENSG00000089351.14	23.3	53.71	-1.171	2.20e-21
HEPH	ENSG00000089472.16	4.45	16.91	-1.716	1.81e-13
LTBP4	ENSG00000090006.17	26.39	54.909	-1.029	9.18e-18
NDUFB2	ENSG00000090266.12	396.395	189.485	1.061	4.56e-14
ICAM1	ENSG00000090339.8	2.98	8.645	-1.277	1.01e-9
IRAK3	ENSG00000090376.8	0.37	2.91	-1.513	8.07e-47
LYZ	ENSG00000090382.6	4.13	10.605	-1.178	3.08e-4
THPO	ENSG00000090534.17	0.09	1.675	-1.295	7.55e-22
USP48	ENSG00000090686.15	14.22	45.386	-1.608	6.34e-36
KIF4A	ENSG00000090889.11	1.51	0.21	1.053	9.03e-23
TNRC6A	ENSG00000090905.17	11.1	28.874	-1.304	5.01e-29
PLEKHG2	ENSG00000090924.14	3.46	8.645	-1.113	9.61e-20
NAT14	ENSG00000090971.4	26.279	12.545	1.01	2.44e-10
PITPNM2	ENSG00000090975.12	5.95	14.885	-1.193	5.16e-34
NRCAM	ENSG00000091129.19	14.97	48.276	-1.626	7.98e-14
RAPGEF4	ENSG00000091428.17	4.78	57.061	-3.328	1.53e-46
PITPNM3	ENSG00000091622.15	0.61	2.52	-1.128	7.62e-14
ORC6	ENSG00000091651.8	5.59	1.3	1.519	4.99e-29
SEMA6A	ENSG00000092421.16	6.15	44.665	-2.675	2.21e-30
UNC13D	ENSG00000092929.11	1.59	7.05	-1.636	1.35e-27
FMO2	ENSG00000094963.13	0.19	8.37	-2.977	1.58e-54
HOOK2	ENSG00000095066.11	10.45	27.856	-1.333	6.28e-26
NANS	ENSG00000095380.10	67.7	20.695	1.663	1.73e-26
SEMA4G	ENSG00000095539.15	2.41	10.64	-1.771	6.89e-13
SORBS1	ENSG00000095637.20	0.91	5.805	-1.833	1.79e-41
PGC	ENSG00000096088.16	0	1.93	-1.551	6.37e-25
ITPR3	ENSG00000096433.10	4.39	9.82	-1.005	1.71e-10
ERMP1	ENSG00000099219.13	4.9	13.51	-1.298	9.31e-12
PRTFDC1	ENSG00000099256.18	5.17	16.205	-1.48	2.55e-20
PALMD	ENSG00000099260.10	19.43	48.092	-1.265	1.49e-14
H2AFY2	ENSG00000099284.13	9.18	1.385	2.094	1.17e-34
MZF1	ENSG00000099326.8	14.05	29.565	-1.022	1.96e-17
TECR	ENSG00000099797.11	343.031	159.918	1.096	1.73e-22
HCN2	ENSG00000099822.2	8.45	2.715	1.347	1.22e-12
IGF2-AS	ENSG00000099869.7	7.27	0.27	2.703	2.81e-32
ZDHHC8	ENSG00000099904.15	13.2	30.185	-1.135	1.53e-25
MMP11	ENSG00000099953.9	3.69	1.125	1.142	4.78e-15
P2RX6	ENSG00000099957.16	0.73	4.223	-1.594	1.76e-15
SUSD2	ENSG00000099994.10	0.82	5.475	-1.831	2.68e-17
SF3A1	ENSG00000099995.18	16.62	39.235	-1.191	7.49e-20
GGT5	ENSG00000099998.17	11.09	42.765	-1.856	4.39e-17
MAPK1	ENSG00000100030.14	10.13	26.86	-1.324	1.27e-20
TOP3B	ENSG00000100038.19	4.58	12.625	-1.288	2.14e-31
GGA1	ENSG00000100083.18	21.299	49.569	-1.181	2.30e-25
SH3BP1	ENSG00000100092.20	1.4	4.365	-1.161	6.44e-21
PIK3IP1	ENSG00000100100.12	14.71	35.515	-1.217	7.09e-5
TTC28	ENSG00000100154.14	1.89	4.795	-1.004	1.86e-28
TIMP3	ENSG00000100234.11	49.579	135.734	-1.435	5.87e-10
RHBDD3	ENSG00000100263.13	14.04	32.08	-1.137	5.45e-23
RASL10A	ENSG00000100276.9	0.32	1.665	-1.014	8.78e-27
NEFH	ENSG00000100285.9	4.45	19.639	-1.921	1.06e-21
MTMR3	ENSG00000100330.15	5.52	21.845	-1.809	3.19e-43
SGSM3	ENSG00000100359.20	24.12	58.901	-1.254	1.05e-24
PVALB	ENSG00000100362.12	2.9	0.405	1.473	6.86e-22
KIAA0930	ENSG00000100364.18	24.69	58.624	-1.215	2.84e-21
NCF4	ENSG00000100365.14	1.98	8.745	-1.709	1.96e-22
FAM118A	ENSG00000100376.11	3.48	8.479	-1.081	3.35e-13
EP300	ENSG00000100393.9	4.54	11.83	-1.212	4.28e-24
ZC3H7B	ENSG00000100403.11	13.61	34.335	-1.274	1.48e-20
HDAC10	ENSG00000100429.17	9.49	29.96	-1.561	1.92e-28
PYGL	ENSG00000100504.16	4.81	22.67	-2.027	2.34e-29
PLEK2	ENSG00000100558.8	8.62	29.732	-1.676	1.04e-11
SRSF5	ENSG00000100650.15	135.993	314.943	-1.206	2.37e-18
PAPLN	ENSG00000100767.15	0.33	5.719	-2.337	5.17e-37
REC8	ENSG00000100918.12	3.02	12.92	-1.792	3.66e-25
PNN	ENSG00000100941.8	17.22	40.126	-1.175	1.59e-27
PLTP	ENSG00000100979.14	20.3	149.981	-2.825	5.18e-20
PROCR	ENSG00000101000.4	7.04	16.51	-1.123	3.05e-12
NINL	ENSG00000101004.14	5.09	12.605	-1.16	5.57e-26
PABPC1L	ENSG00000101104.12	3.88	19.505	-2.071	2.71e-30
SLC17A9	ENSG00000101194.17	0.42	4.425	-1.934	8.65e-41
NKAIN4	ENSG00000101198.14	1.4	0.08	1.152	1.92e-17
RASSF2	ENSG00000101265.15	1.14	5.69	-1.644	1.48e-36
FERMT1	ENSG00000101311.15	3.2	15.52	-1.976	1.28e-25
HCK	ENSG00000101336.12	1.93	6.83	-1.418	5.53e-17
FAM83D	ENSG00000101447.13	2.3	0.33	1.311	2.98e-20
ZNF516	ENSG00000101493.10	2.91	6.84	-1.004	9.47e-29
SMCHD1	ENSG00000101596.14	2.86	7.35	-1.113	1.68e-29
MXRA5	ENSG00000101825.7	1.83	6.075	-1.322	4.20e-3
PRPS2	ENSG00000101911.12	11.43	24.853	-1.056	9.91e-5
SRPX	ENSG00000101955.14	12.07	34.362	-1.436	2.55e-12
MCF2	ENSG00000101977.19	1.12	15.659	-2.974	2.23e-14
SYP	ENSG00000102003.10	44.12	7.525	2.404	2.53e-12
RENBP	ENSG00000102032.12	8.19	18.774	-1.106	9.76e-4
SMS	ENSG00000102172.15	147.155	72.148	1.018	5.83e-13
KLHL4	ENSG00000102271.13	1.61	23.005	-3.201	2.95e-25
GABRE	ENSG00000102287.16	0.87	6.93	-2.084	1.63e-22
MAGED2	ENSG00000102316.16	243.469	94.999	1.349	1.88e-20
KLF8	ENSG00000102349.14	0.29	2.255	-1.335	5.35e-51
SRPX2	ENSG00000102359.5	0.45	6.51	-2.373	2.22e-45
SYTL4	ENSG00000102362.15	0.98	5.155	-1.636	1.11e-35
KLF5	ENSG00000102554.13	0.29	1.975	-1.206	7.43e-24
PARP4	ENSG00000102699.5	10.39	22.255	-1.03	5.33e-12
VWA8	ENSG00000102763.15	2.8	7.745	-1.202	8.70e-23
MEDAG	ENSG00000102802.9	0.38	1.96	-1.101	3.65e-15
HSF4	ENSG00000102878.15	21.6	60.419	-1.442	5.03e-21
NFAT5	ENSG00000102908.20	2.67	8.935	-1.437	2.58e-25
PLLP	ENSG00000102934.9	4.98	1.775	1.108	1.86e-19
MMP15	ENSG00000102996.4	7.42	3.18	1.01	3.18e-17
NDRG4	ENSG00000103034.14	64.021	166.202	-1.363	4.72e-8
SETD6	ENSG00000103037.11	8.47	18.25	-1.023	1.33e-23
SLC7A6	ENSG00000103064.13	5.09	14.495	-1.347	4.07e-28
WDR59	ENSG00000103091.14	16.44	37.655	-1.148	1.24e-25
TAF1C	ENSG00000103168.16	17.881	37.77	-1.038	2.77e-22
WFDC1	ENSG00000103175.10	2.03	17.955	-2.645	1.32e-45
RHBDL1	ENSG00000103269.13	1.4	4.605	-1.224	1.67e-16
TCEB2	ENSG00000103363.14	522.83	231.263	1.173	1.49e-26
NOMO1	ENSG00000103512.14	51.631	24.41	1.051	1.01e-19
MYEF2	ENSG00000104177.17	10.43	25.736	-1.226	4.20e-21
ZDHHC2	ENSG00000104219.12	2.91	8.135	-1.224	3.26e-13
IKBKB	ENSG00000104365.13	12.48	34.86	-1.412	3.67e-28
PLAT	ENSG00000104368.17	4.28	29.85	-2.547	1.08e-25
WISP1	ENSG00000104415.13	0.73	6.715	-2.157	1.38e-29
NDRG1	ENSG00000104419.14	34.57	84.527	-1.266	1.05e-8
GSDMD	ENSG00000104518.10	19.43	51.175	-1.353	1.84e-13
SQLE	ENSG00000104549.11	72.378	13.745	2.315	5.58e-13
SH2D4A	ENSG00000104611.11	2.62	7.86	-1.291	2.71e-13
SNRNP70	ENSG00000104852.14	111.453	244.848	-1.128	1.03e-20
FCGRT	ENSG00000104870.12	37.93	100.45	-1.382	2.44e-15
RNASEH2A	ENSG00000104889.4	26.521	6.045	1.966	3.19e-43
LILRB1	ENSG00000104972.14	0.66	3.425	-1.414	1.02e-26
OLFM2	ENSG00000105088.8	69.458	28.749	1.244	1.02e-4
RASAL3	ENSG00000105122.12	1.01	3.114	-1.033	5.78e-22
SYDE1	ENSG00000105137.12	4.13	9.83	-1.078	1.62e-15
NUMBL	ENSG00000105245.9	6.04	13.74	-1.066	5.62e-19
SLC1A5	ENSG00000105281.12	5.08	11.895	-1.085	8.03e-6
TGFB1	ENSG00000105329.9	11.64	25.864	-1.088	2.61e-10
MYH14	ENSG00000105357.15	3	0.83	1.128	4.28e-12
LIG1	ENSG00000105486.13	21.421	9.375	1.112	2.06e-22
PLEKHA4	ENSG00000105559.11	7.15	17.205	-1.16	7.16e-16
RAB3A	ENSG00000105649.9	19.39	6.245	1.493	5.09e-15
TMEM59L	ENSG00000105696.8	0.4	2.764	-1.427	2.37e-13
SCN1B	ENSG00000105711.10	2.7	11.925	-1.805	7.75e-19
RASA4	ENSG00000105808.17	10.65	24.569	-1.134	2.35e-16
TFEC	ENSG00000105967.15	0.27	1.555	-1.008	6.16e-28
HOXA5	ENSG00000106004.4	11.14	28	-1.256	3.88e-15
HOXA6	ENSG00000106006.6	1.17	3.725	-1.123	3.73e-19
HOXA13	ENSG00000106031.7	3.06	0.13	1.845	3.26e-33
NPTX2	ENSG00000106236.3	450.879	24.13	4.168	6.94e-31
NUDT1	ENSG00000106268.15	21.63	7.155	1.472	4.38e-37
PLOD3	ENSG00000106397.11	64.48	26.21	1.267	9.07e-25
ZNHIT1	ENSG00000106400.11	108.631	46.946	1.193	2.91e-30
SFRP4	ENSG00000106483.11	0.48	4.24	-1.824	2.26e-19
MEST	ENSG00000106484.14	12.27	43.389	-1.742	1.11e-17
RARRES2	ENSG00000106538.9	541.08	1789.7	-1.724	4.16e-15
OGN	ENSG00000106809.10	0.03	5.139	-2.575	4.71e-42
PTGR1	ENSG00000106853.16	39.849	94.92	-1.232	1.85e-11
SUSD1	ENSG00000106868.16	2.64	6.86	-1.111	3.82e-24
MPDZ	ENSG00000107186.16	4.75	10.68	-1.022	4.62e-23
PTGDS	ENSG00000107317.11	1.37	183.864	-6.285	2.00e-41
SHB	ENSG00000107338.9	1.52	5.01	-1.254	1.52e-9
GATA3	ENSG00000107485.15	0.6	2.575	-1.16	1.50e-6
RASSF4	ENSG00000107551.20	3.27	12.17	-1.625	3.24e-25
SPOCK2	ENSG00000107742.12	8.02	17.644	-1.047	2.01e-8
SH3PXD2A	ENSG00000107957.16	1.55	6.05	-1.467	1.44e-32
MAP3K8	ENSG00000107968.9	1.53	11.895	-2.35	1.34e-37
UBE2S	ENSG00000108106.13	50.569	12.145	1.972	4.92e-29
PBLD	ENSG00000108187.15	3.81	8.925	-1.045	1.15e-8
RAPGEFL1	ENSG00000108352.11	1.05	3.8	-1.227	2.02e-25
45904	ENSG00000108387.14	17.96	108.266	-2.527	3.06e-20
TRIM16L	ENSG00000108448.20	5.01	12.625	-1.181	1.05e-15
PIGL	ENSG00000108474.16	7.58	19.755	-1.274	7.91e-29
RASD1	ENSG00000108551.4	6.13	13.374	-1.012	3.21e-5
FTSJ3	ENSG00000108592.16	11.42	25.906	-1.115	4.45e-18
KAT2A	ENSG00000108773.10	23.94	76.781	-1.641	2.47e-31
EZH1	ENSG00000108799.12	7.82	22.415	-1.409	1.15e-33
PPP1R9B	ENSG00000108819.10	11.58	27.4	-1.175	4.26e-22
RND2	ENSG00000108830.9	0.61	2.235	-1.007	3.63e-22
LUC7L3	ENSG00000108848.15	32.931	96.941	-1.529	4.18e-33
HLF	ENSG00000108924.13	3.48	10.12	-1.312	1.33e-4
FAM20A	ENSG00000108950.11	0.78	4.435	-1.61	1.54e-12
WSB1	ENSG00000109046.14	17.71	60.989	-1.728	4.10e-38
SLC9A3R1	ENSG00000109062.9	26.25	139.637	-2.368	1.27e-29
VTN	ENSG00000109072.13	31.701	90.713	-1.488	2.12e-8
PMP22	ENSG00000109099.13	14.52	33.8	-1.165	2.78e-18
RAB34	ENSG00000109113.17	7.59	90.446	-3.412	2.40e-25
SULT1E1	ENSG00000109193.10	0.14	13.39	-3.658	1.86e-55
MAPK10	ENSG00000109339.18	5.46	14.33	-1.247	3.40e-12
GAB1	ENSG00000109458.8	2.33	6.45	-1.162	2.13e-15
KLHL2	ENSG00000109466.13	5.7	13.045	-1.068	2.59e-19
SOD3	ENSG00000109610.5	3.99	14.357	-1.622	3.46e-21
SH3D19	ENSG00000109686.16	4.24	13.555	-1.474	4.04e-26
NCAPG	ENSG00000109805.9	2.65	0.465	1.317	5.25e-23
ZBTB16	ENSG00000109906.13	4.32	9.695	-1.007	6.99e-9
FNBP4	ENSG00000109920.12	13.59	52.892	-1.885	2.41e-66
VWA5A	ENSG00000110002.15	7.53	23.17	-1.503	1.81e-19
OSBP	ENSG00000110048.11	16.12	40.524	-1.278	4.11e-21
UNC93B1	ENSG00000110057.7	6.87	17.82	-1.258	9.11e-22
MS4A6A	ENSG00000110077.14	10.55	41.568	-1.882	8.13e-15
MS4A4A	ENSG00000110079.16	3.46	17.684	-2.067	7.67e-22
TRIM3	ENSG00000110171.18	4.11	11.06	-1.239	3.73e-40
RNF141	ENSG00000110315.6	9.57	22.61	-1.159	3.14e-20
IL10RA	ENSG00000110324.9	1.39	7.845	-1.888	1.01e-27
GALNT18	ENSG00000110328.5	5.3	2.15	1	1.42e-10
PITPNM1	ENSG00000110697.12	6.57	20.816	-1.527	1.46e-21
TCIRG1	ENSG00000110719.9	41.74	192.484	-2.179	2.00e-27
VWF	ENSG00000110799.13	39.5	6.325	2.467	4.73e-32
P3H3	ENSG00000110811.19	4.19	10.485	-1.146	6.87e-3
MVK	ENSG00000110921.11	53.69	17.65	1.552	1.31e-10
PTGES3	ENSG00000110958.15	191.406	94.297	1.014	3.42e-9
TNS2	ENSG00000111077.17	65.598	146.077	-1.143	2.62e-17
MAGOHB	ENSG00000111196.9	26.99	10.565	1.275	9.61e-30
FOXM1	ENSG00000111206.12	7.18	1.46	1.733	1.12e-20
MYL2	ENSG00000111245.14	0.04	1.445	-1.233	5.73e-18
SCNN1A	ENSG00000111319.12	0.43	11.005	-3.07	2.52e-42
MGP	ENSG00000111341.9	259.825	1102.99	-2.082	4.34e-18
MRPL51	ENSG00000111639.7	218.698	104.477	1.059	1.59e-19
GAPDH	ENSG00000111640.14	4451.88	1499.69	1.569	1.23e-20
GNB3	ENSG00000111664.10	0.22	2.365	-1.464	4.11e-16
LPCAT3	ENSG00000111684.10	23.96	50.485	-1.045	8.98e-14
ST8SIA1	ENSG00000111728.10	0.91	5.53	-1.773	1.96e-26
PHC1	ENSG00000111752.10	6.44	19.215	-1.442	2.43e-28
MAN1A1	ENSG00000111885.6	7.7	23.96	-1.521	9.86e-14
TPD52L1	ENSG00000111907.20	104.85	300.713	-1.511	1.18e-13
SOD2	ENSG00000112096.16	78.661	227.488	-1.52	1.85e-14
FBXO9	ENSG00000112146.16	19.76	157.422	-2.932	2.30e-48
ZNF451	ENSG00000112200.16	6.52	16.53	-1.221	4.47e-32
FHL5	ENSG00000112214.10	0.45	2.605	-1.314	2.84e-27
GMNN	ENSG00000112312.9	17.16	6.465	1.283	2.61e-20
MDFI	ENSG00000112559.13	0.59	3.6	-1.533	2.88e-24
SMOC2	ENSG00000112562.18	1.6	5.135	-1.238	5.98e-21
PRPF4B	ENSG00000112739.16	10.5	26.034	-1.233	9.53e-29
SLC29A1	ENSG00000112759.16	44.739	107.135	-1.241	3.70e-11
HMGCS1	ENSG00000112972.14	85.977	24.995	1.742	1.63e-5
KIF20A	ENSG00000112984.11	2.81	0.65	1.207	9.44e-16
TMCO6	ENSG00000113119.12	7.06	20.14	-1.391	5.90e-25
SPARC	ENSG00000113140.10	2096.26	692.777	1.596	4.04e-14
HMGCR	ENSG00000113161.15	85.84	33.395	1.336	5.29e-5
PCDHB5	ENSG00000113209.8	5.67	1.385	1.484	3.82e-21
PDE8B	ENSG00000113231.13	6.32	1.33	1.652	9.63e-21
THBS4	ENSG00000113296.14	5.37	1.32	1.457	1.71e-21
LMNB1	ENSG00000113368.11	4.69	1.775	1.036	1.20e-15
SLC27A6	ENSG00000113396.12	0.5	8.21	-2.618	1.68e-14
TARS	ENSG00000113407.13	74.238	35.615	1.039	4.83e-11
LIFR	ENSG00000113594.9	1.96	7.615	-1.541	7.41e-16
PDGFRB	ENSG00000113721.13	8.28	21.29	-1.264	7.84e-13
NPHP3	ENSG00000113971.18	4.25	14.8	-1.59	1.93e-44
OGG1	ENSG00000114026.21	7.79	17.21	-1.051	1.92e-22
PFKFB4	ENSG00000114268.11	5.19	1.69	1.202	2.83e-13
FGF12	ENSG00000114279.13	10.47	36.54	-1.711	3.07e-18
USP9Y	ENSG00000114374.12	0.01	13.416	-3.835	9.65e-8
HYAL1	ENSG00000114378.16	7.23	18.165	-1.219	3.70e-7
PLSCR4	ENSG00000114698.14	9.18	27.374	-1.479	3.38e-17
GORASP1	ENSG00000114745.13	12.75	33.445	-1.325	2.22e-32
VIPR1	ENSG00000114812.12	0.18	2.22	-1.448	1.82e-39
TNNC1	ENSG00000114854.7	0.33	5.438	-2.275	8.77e-34
NKTR	ENSG00000114857.17	8.11	33.481	-1.92	4.38e-48
SLC4A3	ENSG00000114923.16	5.37	15.564	-1.379	4.29e-15
KCNIP3	ENSG00000115041.12	5.96	1.135	1.705	1.26e-27
STEAP3	ENSG00000115107.19	1.47	5.005	-1.282	9.94e-12
TP53I3	ENSG00000115129.13	5.53	22.81	-1.866	1.53e-26
POMC	ENSG00000115138.10	0.85	7.64	-2.223	4.80e-12
TANC1	ENSG00000115183.13	4.02	12.23	-1.398	4.73e-35
SLC30A3	ENSG00000115194.10	0.18	1.885	-1.29	5.63e-5
FNDC4	ENSG00000115226.9	35.429	116.041	-1.684	3.07e-23
PDE1A	ENSG00000115252.18	0.77	2.685	-1.058	4.47e-12
NDUFS7	ENSG00000115286.19	213.308	103.181	1.041	3.71e-23
GRB14	ENSG00000115290.9	3.03	34.97	-3.158	1.13e-27
SPTBN1	ENSG00000115306.15	42.071	111.437	-1.384	5.40e-38
REG1A	ENSG00000115386.5	0	3.72	-2.239	6.40e-19
GLS	ENSG00000115419.12	18.81	66.325	-1.765	7.08e-20
IGFBP5	ENSG00000115461.4	13.02	142.759	-3.358	7.06e-46
IL1R1	ENSG00000115594.11	20.05	50.611	-1.294	9.80e-14
IL1RL1	ENSG00000115602.16	0.22	17.474	-3.921	2.96e-51
IL18R1	ENSG00000115604.10	0.28	1.785	-1.122	5.34e-19
RMDN2	ENSG00000115841.19	11.49	35.835	-1.56	6.13e-20
SDC1	ENSG00000115884.10	39.56	12.794	1.556	3.68e-12
SLC1A4	ENSG00000115902.10	11.56	24.739	-1.035	1.74e-10
KYNU	ENSG00000115919.14	0.4	2.955	-1.498	1.99e-18
PLEK	ENSG00000115956.9	0.92	3.71	-1.295	5.69e-14
TIA1	ENSG00000116001.15	16.19	51.46	-1.61	1.97e-30
EPAS1	ENSG00000116016.13	22.27	49.17	-1.108	1.94e-14
PLEKHA3	ENSG00000116095.10	4.3	10.46	-1.113	2.08e-16
S100PBP	ENSG00000116497.17	4.74	13.68	-1.355	1.33e-35
TRIM62	ENSG00000116525.13	1.82	5.33	-1.167	2.39e-34
RHOU	ENSG00000116574.5	16.72	7.485	1.062	4.76e-6
GON4L	ENSG00000116580.18	7.06	16.54	-1.122	7.21e-28
NCF2	ENSG00000116701.14	1.07	4.155	-1.316	8.71e-18
PLA2G4A	ENSG00000116711.9	0.33	5.865	-2.368	7.59e-39
PRDM2	ENSG00000116731.22	5.2	12.775	-1.152	1.05e-34
SRSF11	ENSG00000116754.13	31.659	121.115	-1.903	3.35e-42
OLFML3	ENSG00000116774.11	3.87	13.455	-1.57	3.24e-12
NID1	ENSG00000116962.14	6.01	27.742	-2.036	2.51e-22
ST6GALNAC5	ENSG00000117069.14	0.57	5.02	-1.939	4.41e-24
IGSF21	ENSG00000117154.11	0.63	3.14	-1.345	1.49e-15
GBP3	ENSG00000117226.11	4.86	12.545	-1.209	1.99e-10
KIF17	ENSG00000117245.12	3.47	19.15	-2.172	4.58e-20
ID3	ENSG00000117318.8	28.789	64.021	-1.126	8.04e-9
SLC2A1	ENSG00000117394.19	25.86	11.089	1.152	4.92e-10
PTCH2	ENSG00000117425.13	0.51	2.4	-1.171	6.12e-29
TSPAN1	ENSG00000117472.9	2.36	8.385	-1.482	1.18e-13
F3	ENSG00000117525.13	6.61	18.53	-1.36	1.30e-13
HSD11B1	ENSG00000117594.9	0.33	4.8	-2.125	8.38e-26
IRF6	ENSG00000117595.10	2.16	9.79	-1.772	5.93e-9
RSRP1	ENSG00000117616.17	25.451	70.893	-1.443	1.04e-21
STMN1	ENSG00000117632.20	80.42	20.369	1.93	8.74e-24
MTFR1L	ENSG00000117640.17	63.901	137.691	-1.096	8.36e-19
NEK2	ENSG00000117650.12	2.16	0.38	1.195	3.86e-17
OSBPL9	ENSG00000117859.18	18.42	47.975	-1.334	7.34e-19
KMT2A	ENSG00000118058.20	2.99	7.955	-1.166	3.68e-29
TNNT2	ENSG00000118194.18	0	2.31	-1.727	4.37e-34
NRP2	ENSG00000118257.16	6.09	24.525	-1.848	5.15e-22
SGK1	ENSG00000118515.11	31.84	100.813	-1.632	5.87e-18
TCF21	ENSG00000118526.6	0.1	1.87	-1.384	1.08e-36
VAMP8	ENSG00000118640.10	10.67	27.75	-1.301	4.35e-6
PKD2	ENSG00000118762.7	4.85	17.61	-1.67	1.20e-23
RARRES1	ENSG00000118849.9	0.36	13.86	-3.45	1.78e-39
TJP2	ENSG00000119139.16	3.92	13.61	-1.57	1.44e-21
FCF1	ENSG00000119616.11	8.57	18.295	-1.012	2.11e-8
FLVCR2	ENSG00000119686.9	4.18	11.615	-1.284	2.83e-17
TGFB3	ENSG00000119699.7	4.56	15.02	-1.527	3.42e-26
RBM25	ENSG00000119707.13	15.67	34.55	-1.093	2.08e-24
KLHL29	ENSG00000119771.14	1.25	7.775	-1.963	1.27e-48
FKBP1B	ENSG00000119782.13	1.01	4.655	-1.492	1.60e-20
GPAM	ENSG00000119927.13	8.97	37.25	-1.94	2.82e-13
PYROXD2	ENSG00000119943.10	1.38	17.795	-2.981	3.91e-43
KCNIP2	ENSG00000120049.18	0.29	2.965	-1.62	3.72e-45
HOXB8	ENSG00000120068.6	0.89	5.095	-1.689	5.80e-15
HOXB3	ENSG00000120093.11	2.42	10.05	-1.692	8.89e-35
TEK	ENSG00000120156.20	0.66	5.08	-1.873	1.50e-46
SNX19	ENSG00000120451.10	10.57	24.565	-1.144	3.24e-19
KCNJ5	ENSG00000120457.11	0.64	30.619	-4.269	2.80e-30
KIAA1217	ENSG00000120549.15	4.05	14.91	-1.656	2.34e-37
MTRF1	ENSG00000120662.15	4.1	10.03	-1.113	5.58e-26
TGFBI	ENSG00000120708.16	21.41	48.19	-1.134	2.96e-3
TMPO	ENSG00000120802.13	32.88	9.24	1.726	1.45e-30
GLT8D2	ENSG00000120820.12	2.54	6.235	-1.031	4.11e-6
NFYB	ENSG00000120837.7	13.53	40.755	-1.523	1.74e-19
PTK2B	ENSG00000120899.17	4.04	11.805	-1.345	1.58e-27
EPHX2	ENSG00000120915.13	17.13	70.702	-1.984	4.18e-25
TRIM25	ENSG00000121060.14	6.73	23.885	-1.687	5.99e-34
SCPEP1	ENSG00000121064.12	85.159	192.664	-1.168	3.01e-15
MND1	ENSG00000121211.7	7.23	0.395	2.561	6.63e-47
TRIM6	ENSG00000121236.19	1.13	4.16	-1.277	2.78e-18
KCNJ8	ENSG00000121361.3	4.44	13.39	-1.403	3.14e-11
PDZRN3	ENSG00000121440.14	3.26	18.19	-2.171	1.80e-14
PILRB	ENSG00000121716.18	19.45	43.25	-1.114	2.62e-20
FABP3	ENSG00000121769.7	119.064	51.117	1.204	2.00e-5
TNFSF10	ENSG00000121858.10	11.44	38.685	-1.674	3.43e-7
TMEM54	ENSG00000121900.18	5.43	12.77	-1.099	3.38e-9
LRIF1	ENSG00000121931.15	13.44	4.92	1.286	1.59e-25
SASH3	ENSG00000122122.9	0.91	4.89	-1.625	3.19e-25
FMOD	ENSG00000122176.10	0.93	10.105	-2.524	1.15e-39
ODF2L	ENSG00000122417.15	5.05	19.695	-1.774	1.63e-38
PTGFR	ENSG00000122420.9	0.56	2.35	-1.103	1.02e-4
LRRC39	ENSG00000122477.12	1.4	5.94	-1.532	6.52e-15
ZMIZ2	ENSG00000122515.14	25.871	63.619	-1.266	1.48e-28
NXPH1	ENSG00000122584.12	1.83	17.58	-2.715	2.31e-20
RAMP3	ENSG00000122679.8	7.36	22.91	-1.516	1.84e-18
TWIST1	ENSG00000122691.12	21.251	3.985	2.158	1.26e-30
ZWINT	ENSG00000122952.16	12.78	3.455	1.629	4.03e-20
ITPR2	ENSG00000123104.11	4.69	11.429	-1.127	5.32e-11
NCKAP1L	ENSG00000123338.12	0.94	4.555	-1.518	7.70e-24
MMP19	ENSG00000123342.15	0.96	6.34	-1.905	1.68e-35
LRP1	ENSG00000123384.13	13.12	42.035	-1.608	2.47e-19
SARDH	ENSG00000123453.16	0.27	1.6	-1.034	3.27e-21
PLP1	ENSG00000123560.13	0.15	1.445	-1.088	2.91e-5
NRK	ENSG00000123572.16	0.93	9.153	-2.395	1.77e-10
G0S2	ENSG00000123689.5	36.801	130.394	-1.797	4.62e-16
PFKFB2	ENSG00000123836.14	2.19	6.265	-1.187	2.13e-14
SLC12A5	ENSG00000124140.12	49.731	18.285	1.395	7.27e-12
PTGIS	ENSG00000124212.5	0.19	2.435	-1.529	1.62e-42
SNAI1	ENSG00000124216.3	1.27	7.475	-1.9	3.42e-31
STX16	ENSG00000124222.21	17.71	40.836	-1.161	3.58e-28
NEURL2	ENSG00000124257.6	2.17	6.035	-1.15	1.97e-12
HIF3A	ENSG00000124440.15	0.79	10	-2.619	8.96e-19
F13A1	ENSG00000124491.15	1.61	22.158	-3.149	1.07e-25
PRICKLE4	ENSG00000124593.14	2.95	11.93	-1.711	1.32e-40
SH3TC1	ENSG00000125089.16	2.36	6.845	-1.223	5.53e-17
MT1G	ENSG00000125144.13	1.92	9.35	-1.826	9.46e-10
SLC25A35	ENSG00000125434.10	2.9	7.97	-1.202	1.42e-22
GGA3	ENSG00000125447.16	8.81	20.83	-1.154	7.16e-32
PPDPF	ENSG00000125534.9	251.026	71.406	1.799	5.49e-24
PAX8	ENSG00000125618.16	1.56	8.695	-1.921	2.69e-26
PSD4	ENSG00000125637.15	11.86	26.945	-1.12	6.50e-19
TNFSF9	ENSG00000125657.4	2.13	0.415	1.145	1.40e-28
SNRPB	ENSG00000125835.17	196.869	85.203	1.199	2.74e-23
ZNF436	ENSG00000125945.14	3.65	10.64	-1.324	3.78e-14
ID1	ENSG00000125968.8	13.65	67.088	-2.217	1.03e-16
ROMO1	ENSG00000125995.15	343.436	146.002	1.228	2.08e-26
STAT5A	ENSG00000126561.16	8.68	39.59	-2.068	7.26e-37
ZNF384	ENSG00000126746.17	15.25	37.65	-1.25	9.32e-23
TIMM17B	ENSG00000126768.12	80.822	39.16	1.027	1.61e-26
L3HYPDH	ENSG00000126790.11	8.13	20.609	-1.243	2.07e-24
OMD	ENSG00000127083.7	0.05	2.125	-1.573	1.51e-33
PTPRB	ENSG00000127329.14	1.2	5.385	-1.537	6.24e-38
LRRC61	ENSG00000127399.14	8.1	43.762	-2.298	3.01e-26
IDUA	ENSG00000127415.12	8.69	23.405	-1.333	2.08e-29
HP1BP3	ENSG00000127483.17	33.121	83.129	-1.302	1.87e-19
KLF2	ENSG00000127528.5	4.44	15.755	-1.623	4.04e-20
PKMYT1	ENSG00000127564.16	14.4	1.55	2.594	2.26e-45
FBXL16	ENSG00000127585.11	5.79	1.44	1.477	1.91e-5
MACF1	ENSG00000127603.23	28.999	65.425	-1.147	3.40e-24
STEAP4	ENSG00000127954.12	1.7	32.844	-3.648	2.60e-48
SGCE	ENSG00000127990.15	26.37	61.052	-1.181	4.57e-9
LRFN1	ENSG00000128011.4	1.98	0.34	1.153	6.05e-29
TUBGCP6	ENSG00000128159.11	12.81	30.95	-1.21	3.49e-33
POM121L9P	ENSG00000128262.8	0.13	2.255	-1.526	9.39e-27
TPST2	ENSG00000128294.15	11.47	27.743	-1.205	7.69e-12
RNF112	ENSG00000128482.15	0.19	1.54	-1.094	1.88e-21
LSM8	ENSG00000128534.7	37.621	15.27	1.247	1.67e-28
VGF	ENSG00000128564.6	1.86	0.16	1.302	1.29e-7
PODXL	ENSG00000128567.16	5.17	11.935	-1.068	6.35e-17
IRF5	ENSG00000128604.18	1.62	5.28	-1.261	4.67e-18
HOXD10	ENSG00000128710.5	1.56	0.06	1.272	2.49e-29
ISLR	ENSG00000129009.12	0.95	11.18	-2.643	1.57e-22
PALLD	ENSG00000129116.17	16.61	40.325	-1.231	3.64e-10
PLD2	ENSG00000129219.13	4.03	12.705	-1.446	9.63e-34
KIF1C	ENSG00000129250.11	11.41	25.745	-1.108	2.63e-20
SIGLEC9	ENSG00000129450.8	0.67	3.945	-1.566	1.82e-16
RIPK3	ENSG00000129465.15	0.41	2.505	-1.314	1.56e-43
RNASE1	ENSG00000129538.13	124.672	279.382	-1.158	4.52e-3
TEP1	ENSG00000129566.12	5.88	13.215	-1.047	5.32e-25
RHBDF2	ENSG00000129667.12	4.25	12.14	-1.324	8.25e-21
RPS4Y1	ENSG00000129824.15	0.24	250.418	-7.664	2.69e-4
STARD8	ENSG00000130052.13	1	3.465	-1.159	3.98e-30
LSM7	ENSG00000130332.14	108.759	49.254	1.127	1.05e-22
MLLT4	ENSG00000130396.20	4.74	17.425	-1.683	1.07e-28
GDF15	ENSG00000130513.6	10.18	4.51	1.021	3.86e-7
TNNI2	ENSG00000130598.15	4.1	1.445	1.061	2.76e-15
H19	ENSG00000130600.15	57.879	775.669	-3.721	7.79e-23
PNPLA7	ENSG00000130653.15	2.05	7.699	-1.512	1.40e-24
GATA5	ENSG00000130700.6	0.04	2.85	-1.888	3.76e-26
THEMIS2	ENSG00000130775.15	3.64	10.684	-1.332	1.04e-9
PLXNA3	ENSG00000130827.6	8.66	23.411	-1.337	1.44e-18
UBE4B	ENSG00000130939.18	10.94	26.25	-1.19	1.29e-19
TXLNGY	ENSG00000131002.11	0.01	17.545	-4.199	1.52e-7
ULBP2	ENSG00000131015.4	4.02	0.44	1.802	1.26e-32
SYNE1	ENSG00000131018.22	9.79	25.165	-1.278	1.17e-11
LILRB2	ENSG00000131042.13	0.91	3.685	-1.294	6.21e-20
HIGD1B	ENSG00000131097.6	3.28	0.29	1.73	1.18e-45
GINS2	ENSG00000131153.8	3.39	0.77	1.31	1.09e-30
PRR7	ENSG00000131188.11	6.99	2.96	1.013	2.90e-9
IDO1	ENSG00000131203.12	3.95	0.26	1.974	2.88e-36
TBC1D5	ENSG00000131374.14	5.28	12.705	-1.126	6.35e-15
SLC6A6	ENSG00000131389.16	8.32	27.284	-1.602	1.29e-25
PDLIM4	ENSG00000131435.12	0.83	4.055	-1.466	2.52e-17
TOP2A	ENSG00000131747.14	7.55	1.155	1.988	1.19e-22
FMO5	ENSG00000131781.12	1.46	5.665	-1.438	2.23e-18
RAI2	ENSG00000131831.17	3.94	10.455	-1.213	8.29e-12
LLGL1	ENSG00000131899.10	6.55	15.54	-1.131	1.19e-19
SPATA6	ENSG00000132122.11	2.15	6.51	-1.253	1.79e-29
TRIM22	ENSG00000132274.15	3.77	14.47	-1.697	6.01e-22
PTCD3	ENSG00000132300.18	14.47	41.815	-1.469	4.19e-30
RAMP1	ENSG00000132329.10	1.35	6.265	-1.628	3.96e-13
PTPRE	ENSG00000132334.16	5.48	14.285	-1.238	1.02e-14
SERPINF1	ENSG00000132386.10	17.84	55.197	-1.577	5.11e-14
PNISR	ENSG00000132424.14	22.83	89.619	-1.927	3.31e-44
XAF1	ENSG00000132530.16	5.2	18.21	-1.631	9.09e-22
MATN2	ENSG00000132561.13	5.91	20.955	-1.668	2.08e-16
SNAP25	ENSG00000132639.12	7.2	3.03	1.025	2.48e-4
KIAA0907	ENSG00000132680.10	10.37	28.204	-1.361	3.64e-34
SYT11	ENSG00000132718.8	0.78	2.975	-1.159	1.15e-12
LPIN3	ENSG00000132793.11	4.24	9.645	-1.023	1.57e-9
FBXO44	ENSG00000132879.13	11.91	27.795	-1.157	5.79e-18
PIK3C2B	ENSG00000133056.13	1.07	3.18	-1.014	1.83e-28
EPSTI1	ENSG00000133106.14	2.55	7.69	-1.291	1.32e-13
STARD13	ENSG00000133121.20	3.38	8.505	-1.118	1.47e-25
TBC1D8B	ENSG00000133138.19	4.32	11.375	-1.218	2.96e-14
SRRM1	ENSG00000133226.16	18.83	44.87	-1.21	2.08e-30
RARRES3	ENSG00000133321.10	5.24	15.185	-1.375	8.01e-9
MYH11	ENSG00000133392.16	0.84	9.595	-2.526	4.61e-29
GSTT2B	ENSG00000133433.10	11.59	46.819	-1.925	6.61e-7
GIMAP6	ENSG00000133561.15	2.19	6.04	-1.142	1.76e-20
ZNF767P	ENSG00000133624.13	3.08	8.375	-1.2	1.23e-36
LYVE1	ENSG00000133800.8	18.08	64.415	-1.778	2.01e-10
MICAL2	ENSG00000133816.13	1.78	7.32	-1.581	8.63e-28
ZFC3H1	ENSG00000133858.15	8.7	20.265	-1.132	6.80e-26
MRPS36	ENSG00000134056.11	56.948	21.455	1.368	9.56e-32
MEIS2	ENSG00000134138.19	8.46	30.615	-1.741	2.08e-29
PRPF38B	ENSG00000134186.11	9.8	24.345	-1.231	1.53e-33
GSTM5	ENSG00000134201.10	0.28	3.435	-1.793	1.82e-39
TRIM45	ENSG00000134253.9	2.19	5.55	-1.038	2.56e-21
SLC38A2	ENSG00000134294.13	38.891	82.753	-1.07	9.21e-13
SAA2	ENSG00000134339.8	0.03	6.728	-2.908	7.04e-28
KIAA1468	ENSG00000134444.13	5.88	14.215	-1.145	1.70e-29
RBM17	ENSG00000134453.15	26.521	62.1	-1.197	1.60e-18
RERG	ENSG00000134533.6	10.4	27.7	-1.332	3.14e-9
YARS	ENSG00000134684.10	33.861	73.366	-1.093	7.97e-20
HOOK1	ENSG00000134709.10	1.39	4.19	-1.119	1.73e-24
SLC43A3	ENSG00000134802.17	4.68	16.66	-1.637	6.84e-17
PDGFRA	ENSG00000134853.11	1.01	15.855	-3.068	2.41e-47
SLC37A2	ENSG00000134955.11	2.83	57.023	-3.921	1.03e-50
GOLM1	ENSG00000135052.16	46.951	121.523	-1.353	2.87e-16
FAM189A2	ENSG00000135063.17	1.5	6.955	-1.67	1.37e-25
HAVCR2	ENSG00000135077.8	1.72	4.515	-1.02	1.09e-10
RNFT2	ENSG00000135119.14	6.41	1.95	1.329	1.49e-26
MDFIC	ENSG00000135272.9	5.23	14.605	-1.325	3.70e-19
ITGA7	ENSG00000135424.15	5.3	16.884	-1.505	4.59e-13
RDH5	ENSG00000135437.9	1.7	5.32	-1.227	7.39e-21
TROAP	ENSG00000135451.12	6.36	1.1	1.809	4.94e-19
FAIM2	ENSG00000135472.8	0.6	3.355	-1.445	1.04e-6
PAN2	ENSG00000135473.14	23.47	59.395	-1.303	7.35e-23
SLC26A10	ENSG00000135502.16	0.49	3.1	-1.46	3.72e-24
MAP7	ENSG00000135525.18	1.68	4.62	-1.068	1.40e-23
MICAL1	ENSG00000135596.17	2.68	9.925	-1.57	9.14e-29
STX11	ENSG00000135604.9	0.52	3.595	-1.596	1.73e-28
KCNMB4	ENSG00000135643.4	1.8	5.34	-1.179	4.33e-5
MDM2	ENSG00000135679.21	65.739	30.55	1.081	7.42e-15
FBXL8	ENSG00000135722.8	4.6	19.835	-1.896	4.22e-38
KCNK1	ENSG00000135750.14	6.48	1.705	1.467	5.17e-14
GLUL	ENSG00000135821.16	35.27	148.93	-2.047	8.79e-24
HTR2B	ENSG00000135914.5	0.89	11.084	-2.677	8.90e-20
SERPINE2	ENSG00000135919.12	22.88	9.36	1.205	7.25e-8
TMBIM1	ENSG00000135926.12	42.62	107.224	-1.311	5.10e-22
VILL	ENSG00000136059.14	0.53	4.125	-1.744	2.98e-37
VPS36	ENSG00000136100.12	5.7	13.445	-1.108	1.79e-23
TBC1D4	ENSG00000136111.12	12.87	55.96	-2.038	1.84e-29
RCBTB1	ENSG00000136144.11	7.23	20.83	-1.407	1.79e-21
PHF11	ENSG00000136147.16	17.37	50.086	-1.476	1.11e-38
TNS3	ENSG00000136205.16	7.55	27.554	-1.74	7.48e-22
TTYH3	ENSG00000136295.14	8.03	23.47	-1.438	9.85e-25
IREB2	ENSG00000136381.12	8.81	21.986	-1.228	8.08e-21
RSAD1	ENSG00000136444.9	16.57	42.01	-1.292	2.08e-28
MYCBPAP	ENSG00000136449.13	0.12	1.69	-1.264	6.48e-31
VEZF1	ENSG00000136451.8	10.17	25.814	-1.263	2.58e-23
SCN7A	ENSG00000136546.13	0	1.48	-1.31	1.34e-37
IL10	ENSG00000136634.5	0.16	1.335	-1.009	1.59e-19
HS6ST1	ENSG00000136720.6	20.659	47.57	-1.165	1.74e-14
GYPC	ENSG00000136732.14	19.88	60.454	-1.557	9.02e-18
TMOD1	ENSG00000136842.13	14.29	43.599	-1.544	4.17e-18
TLR4	ENSG00000136869.13	1.04	5.8	-1.737	7.49e-39
FPGS	ENSG00000136877.14	29.97	62.062	-1.026	3.02e-17
GARNL3	ENSG00000136895.18	3.82	13.045	-1.543	7.68e-31
TSTD2	ENSG00000136925.14	3.31	9.85	-1.332	2.93e-30
MYC	ENSG00000136997.14	8.05	29.635	-1.759	7.61e-21
NOV	ENSG00000136999.4	37.569	362.101	-3.235	2.79e-16
IL33	ENSG00000137033.11	1.86	9.045	-1.812	2.44e-36
KIF13A	ENSG00000137177.18	5.53	18.17	-1.554	2.01e-26
IER3	ENSG00000137331.11	5.62	26.895	-2.075	7.60e-22
TLR2	ENSG00000137462.6	1.93	5.459	-1.14	1.38e-18
MYO7A	ENSG00000137474.19	5.42	40.555	-2.694	3.29e-53
SLCO2B1	ENSG00000137491.14	3.14	34.064	-3.082	2.82e-43
IL18BP	ENSG00000137496.17	5.03	13.255	-1.241	3.45e-20
RAB30	ENSG00000137502.9	3.18	7.58	-1.037	2.10e-13
LRRC32	ENSG00000137507.11	14.73	36.625	-1.258	1.17e-19
GGH	ENSG00000137563.11	22.86	5.695	1.833	7.84e-37
YAP1	ENSG00000137693.13	8.9	24.425	-1.361	1.16e-19
RDX	ENSG00000137710.14	47.629	172.714	-1.837	6.88e-21
PPP2R1B	ENSG00000137713.15	4.07	10.33	-1.16	3.32e-20
FXYD6	ENSG00000137726.15	20.44	52.517	-1.32	1.53e-6
SQRDL	ENSG00000137767.13	5.94	20.245	-1.614	2.11e-20
THBS1	ENSG00000137801.10	3.25	43.388	-3.385	4.43e-43
MAPKBP1	ENSG00000137802.13	3.95	14.395	-1.637	2.04e-47
ITGA11	ENSG00000137809.16	0.59	2.96	-1.316	1.34e-19
PARP6	ENSG00000137817.16	22.751	52.211	-1.164	1.55e-17
PAQR5	ENSG00000137819.13	3.52	13.35	-1.667	2.47e-17
PLCB2	ENSG00000137841.11	1.79	12.05	-2.226	3.88e-33
PAK6	ENSG00000137843.11	0.36	1.935	-1.11	1.37e-14
GCOM1	ENSG00000137878.16	0.21	3.05	-1.743	1.84e-25
GIPC2	ENSG00000137960.5	0.87	13.985	-3.002	8.49e-31
KHK	ENSG00000138030.12	2.99	8.289	-1.219	4.95e-10
TRIM54	ENSG00000138100.13	0.09	8.79	-3.167	3.39e-36
MYOF	ENSG00000138119.16	6.91	15.24	-1.038	8.99e-9
LOXL4	ENSG00000138131.3	0.23	1.68	-1.124	2.04e-5
KIF11	ENSG00000138160.5	2.73	0.66	1.168	9.04e-24
RBP4	ENSG00000138207.12	0.39	7.435	-2.601	3.84e-13
IDH1	ENSG00000138413.13	90.49	225.72	-1.309	9.22e-12
SLC40A1	ENSG00000138449.10	19.2	319.206	-3.987	2.07e-19
PARP9	ENSG00000138496.16	10.97	24.6	-1.097	6.34e-16
SHF	ENSG00000138606.19	1.18	8.805	-2.169	5.40e-26
SEMA7A	ENSG00000138623.9	10.18	2.35	1.739	7.04e-16
FAM13A	ENSG00000138640.14	5.34	14.115	-1.253	8.74e-18
PCDH10	ENSG00000138650.8	0.01	1.39	-1.243	5.63e-33
KIAA1109	ENSG00000138688.15	8.19	21.91	-1.318	7.81e-25
PDE5A	ENSG00000138735.15	1.56	4.78	-1.175	2.13e-14
PRDM5	ENSG00000138738.10	1.26	3.705	-1.058	4.48e-18
SLC39A8	ENSG00000138821.12	7.13	2.46	1.232	9.04e-24
MAPK8IP3	ENSG00000138834.12	20.031	48.65	-1.239	1.13e-21
RGS3	ENSG00000138835.22	59.54	27.495	1.087	7.65e-21
PARVG	ENSG00000138964.16	1.74	9.315	-1.912	7.10e-32
YARS2	ENSG00000139131.12	20.49	9.465	1.038	3.85e-30
VAMP1	ENSG00000139190.16	2.86	12.295	-1.784	8.26e-37
LUM	ENSG00000139329.4	13.79	249.95	-4.085	6.52e-33
SNRPF	ENSG00000139343.10	37.19	17.2	1.069	6.79e-28
GAS2L3	ENSG00000139354.10	3.33	0.72	1.332	1.44e-30
FAM222A	ENSG00000139438.5	33.43	10.244	1.614	8.32e-14
MTMR6	ENSG00000139505.11	4.82	12.555	-1.22	2.47e-26
N4BP2L1	ENSG00000139597.16	2.15	7.725	-1.47	1.31e-28
SMARCC2	ENSG00000139613.11	16.381	39.156	-1.208	1.23e-18
MAP3K12	ENSG00000139625.12	8.04	19.54	-1.184	5.56e-16
WDFY2	ENSG00000139668.8	3.66	9.985	-1.237	4.84e-35
LPAR6	ENSG00000139679.15	5.82	16.35	-1.347	6.04e-23
SLAIN1	ENSG00000139737.21	3.26	7.58	-1.01	7.61e-12
RBM26	ENSG00000139746.15	9	20.345	-1.094	3.17e-32
MBNL2	ENSG00000139793.18	15.3	33.56	-1.084	1.92e-16
GRTP1	ENSG00000139835.13	5.61	14.125	-1.194	2.61e-15
TSSK4	ENSG00000139908.14	0.29	1.905	-1.171	4.78e-39
FRMD6	ENSG00000139926.15	1.71	6.81	-1.527	4.06e-23
RDH12	ENSG00000139988.9	0.65	2.405	-1.045	1.37e-8
ESR2	ENSG00000140009.18	0.99	5.34	-1.672	1.29e-32
FBLN5	ENSG00000140092.14	9.14	49.256	-2.309	7.78e-30
SLC12A6	ENSG00000140199.11	2.21	5.435	-1.003	5.64e-18
SORD	ENSG00000140263.13	6.86	25.789	-1.769	2.49e-22
SLC27A2	ENSG00000140284.10	0.82	10.598	-2.672	1.01e-12
FGF7	ENSG00000140285.9	0.28	1.885	-1.172	4.37e-20
NEIL1	ENSG00000140398.13	6.56	49.75	-2.747	1.13e-59
MAN2C1	ENSG00000140400.14	55.629	206.958	-1.877	7.17e-34
TPM1	ENSG00000140416.19	41.671	98.557	-1.222	1.34e-20
LMAN1L	ENSG00000140506.16	0.16	1.735	-1.237	2.39e-15
NTRK3	ENSG00000140538.16	0.13	1.485	-1.137	6.74e-37
MCTP2	ENSG00000140563.14	0.36	3.515	-1.731	8.84e-33
IRF8	ENSG00000140968.10	0.65	3.55	-1.463	1.78e-29
KSR1	ENSG00000141068.13	6.57	24.775	-1.768	8.44e-34
RANBP10	ENSG00000141084.10	6.91	20.35	-1.432	9.33e-24
TOM1L1	ENSG00000141198.13	7.28	15.89	-1.028	3.42e-14
SGSM2	ENSG00000141258.12	10.62	41.04	-1.855	8.90e-40
NPEPPS	ENSG00000141279.15	22.099	73.886	-1.697	5.24e-32
SKAP1	ENSG00000141293.15	0.77	6.944	-2.166	4.82e-10
SS18	ENSG00000141380.13	18.86	51.504	-1.403	4.85e-33
SLMO1	ENSG00000141391.13	0.65	2.42	-1.052	5.58e-26
IMPA2	ENSG00000141401.11	5.13	14.86	-1.371	6.98e-15
GAREM	ENSG00000141441.15	1.63	4.475	-1.058	2.99e-20
GATA6	ENSG00000141448.8	19.1	41.818	-1.091	2.35e-20
NPC1	ENSG00000141458.12	27.319	57.308	-1.042	5.99e-12
SLC13A5	ENSG00000141485.15	0.15	1.634	-1.196	6.62e-5
MINK1	ENSG00000141503.15	20.71	43.635	-1.04	2.39e-21
PIK3R5	ENSG00000141506.13	0.82	5.56	-1.85	2.10e-42
TMC6	ENSG00000141524.15	2.73	9.715	-1.522	3.38e-28
SMAD4	ENSG00000141646.13	7.06	20.98	-1.447	2.95e-23
PMAIP1	ENSG00000141682.11	1.83	0.185	1.256	1.60e-21
ERBB2	ENSG00000141736.13	1.99	5.105	-1.03	1.56e-13
PNMT	ENSG00000141744.3	0.03	1.539	-1.302	7.92e-13
IGFBP4	ENSG00000141753.6	31.71	192.771	-2.567	1.44e-25
SLC39A3	ENSG00000141873.10	49.511	23.28	1.057	6.93e-19
VAV1	ENSG00000141968.7	0.77	2.755	-1.085	3.67e-11
MYO1F	ENSG00000142347.16	1.7	7.22	-1.606	1.20e-27
SLC47A1	ENSG00000142494.13	32.21	87.429	-1.413	1.88e-11
SIGLEC10	ENSG00000142512.14	0.81	9.025	-2.469	1.45e-36
FAM71E1	ENSG00000142530.10	3.5	0.955	1.203	2.01e-29
RCN3	ENSG00000142552.7	10.1	24.735	-1.213	1.65e-17
SLC2A5	ENSG00000142583.17	0.37	2.595	-1.392	8.15e-10
RERE	ENSG00000142599.17	11.96	41.276	-1.706	1.82e-31
EPHA2	ENSG00000142627.12	1.47	6.235	-1.551	4.55e-28
EVA1B	ENSG00000142694.6	8.69	22.81	-1.297	1.36e-11
FCN3	ENSG00000142748.12	7.54	23.84	-1.54	8.76e-9
NBPF3	ENSG00000142794.18	1.71	4.725	-1.079	1.60e-22
TINAGL1	ENSG00000142910.15	10.33	36.063	-1.71	5.90e-25
TMEM61	ENSG00000143001.4	1.33	4.83	-1.323	8.07e-21
SYPL2	ENSG00000143028.8	2.78	10.415	-1.594	3.11e-35
SLC44A3	ENSG00000143036.16	1.7	7.41	-1.639	9.80e-22
PROK1	ENSG00000143125.5	0.12	4.855	-2.386	8.10e-9
ITGA10	ENSG00000143127.12	0.31	1.655	-1.019	3.70e-17
FCGR2A	ENSG00000143226.13	5.32	17.745	-1.568	5.32e-19
NUF2	ENSG00000143228.12	2.51	0.585	1.147	1.01e-19
RORC	ENSG00000143365.16	0.09	1.745	-1.332	5.61e-4
RFX5	ENSG00000143390.17	9.18	27.03	-1.461	6.01e-20
SELENBP1	ENSG00000143416.20	1.73	20.43	-2.973	1.97e-33
POGZ	ENSG00000143442.21	11.19	31.24	-1.403	1.20e-27
S100A8	ENSG00000143546.9	2.48	35.493	-3.39	1.96e-31
INTS3	ENSG00000143624.13	18.301	48.91	-1.371	2.29e-26
SCCPDH	ENSG00000143653.9	15.5	42.608	-1.402	9.36e-24
SOX13	ENSG00000143842.14	4.48	15.87	-1.622	7.30e-35
ETNK2	ENSG00000143845.14	18.39	4.365	1.854	4.06e-17
PLEKHA6	ENSG00000143850.12	0.18	1.99	-1.341	5.55e-13
PTPN7	ENSG00000143851.15	1.13	7.579	-2.01	2.71e-4
OSR1	ENSG00000143867.6	0.23	1.565	-1.06	2.55e-15
GALM	ENSG00000143891.16	25.329	79.453	-1.611	2.08e-15
REG3G	ENSG00000143954.12	0.06	23.373	-4.523	7.05e-25
MEIS1	ENSG00000143995.19	21.989	68.46	-1.595	4.47e-19
RABL2A	ENSG00000144134.18	3.45	9.525	-1.242	3.90e-31
FAM171B	ENSG00000144369.12	1.19	3.65	-1.086	1.86e-16
RBMS3	ENSG00000144642.20	1.23	4.935	-1.412	2.56e-40
FAM198A	ENSG00000144649.8	0.49	2.18	-1.094	2.25e-20
NFKBIZ	ENSG00000144802.11	0.67	5.67	-1.998	7.41e-36
IGSF11	ENSG00000144847.12	0.6	6.58	-2.244	2.58e-32
TMEM108	ENSG00000144868.13	3.28	9.895	-1.348	3.94e-14
LPP	ENSG00000145012.12	2.87	7.605	-1.153	1.88e-28
TCTA	ENSG00000145022.4	17.321	43.46	-1.279	1.01e-24
NICN1	ENSG00000145029.11	4.32	15.34	-1.619	3.38e-28
SLIT2	ENSG00000145147.19	2.02	11.07	-1.999	6.48e-19
VWA5B2	ENSG00000145198.14	25.12	63.619	-1.307	1.98e-7
SLC26A1	ENSG00000145217.13	1.05	5.79	-1.728	7.31e-36
OCIAD2	ENSG00000145247.11	56.211	27.469	1.007	1.45e-16
USP53	ENSG00000145390.11	2.39	9.31	-1.605	5.64e-25
SFRP2	ENSG00000145423.4	0.26	2.315	-1.396	1.12e-3
NKD2	ENSG00000145506.13	0.29	6.78	-2.592	7.26e-57
MYO10	ENSG00000145555.14	6.69	1.9	1.407	4.36e-15
RPL37	ENSG00000145592.13	1958.05	903.167	1.115	1.06e-15
OSMR	ENSG00000145623.12	7.98	22.735	-1.402	3.17e-20
SSBP2	ENSG00000145687.15	22.899	10.09	1.108	6.95e-12
IQGAP2	ENSG00000145703.15	38.481	14.498	1.349	3.25e-11
KLHL3	ENSG00000146021.14	2.38	6.36	-1.123	4.39e-21
HIGD2A	ENSG00000146066.2	303.467	136.163	1.15	3.47e-28
FGD2	ENSG00000146192.14	0.76	9.105	-2.521	4.92e-51
SCUBE3	ENSG00000146197.8	0.06	1.55	-1.266	9.83e-33
RARS2	ENSG00000146282.17	15.92	35.215	-1.098	2.48e-15
RNF217	ENSG00000146373.16	0.79	4.115	-1.515	1.20e-46
RSPO3	ENSG00000146374.13	0.04	8.24	-3.151	3.19e-41
IGFBP3	ENSG00000146674.14	66.948	4.915	3.522	1.71e-49
ZC3HAV1L	ENSG00000146858.7	0.26	1.705	-1.102	3.11e-29
SYTL5	ENSG00000147041.11	0.36	6.025	-2.369	8.18e-31
SLC16A2	ENSG00000147100.9	8.91	30.599	-1.673	4.05e-21
OGT	ENSG00000147162.13	17.629	55.79	-1.608	6.97e-32
ZNF711	ENSG00000147180.16	3.6	10	-1.258	4.34e-9
NXF3	ENSG00000147206.16	0.07	1.85	-1.413	1.37e-46
GPC3	ENSG00000147257.13	2.48	8.515	-1.451	3.36e-14
FATE1	ENSG00000147378.11	2.55	0.15	1.626	6.12e-19
ZNF185	ENSG00000147394.18	1.14	4.545	-1.374	3.21e-7
HMBOX1	ENSG00000147421.17	14.57	31.545	-1.064	1.92e-21
STAR	ENSG00000147465.11	1785.86	4102.96	-1.2	2.45e-7
LACTB2	ENSG00000147592.8	17.51	36.99	-1.037	2.06e-7
SYBU	ENSG00000147642.16	9.67	33.069	-1.675	4.79e-16
NAPRT	ENSG00000147813.15	16.829	44.289	-1.345	1.07e-6
PLIN2	ENSG00000147872.9	15.29	100.468	-2.639	1.40e-29
IDNK	ENSG00000148057.15	3.73	11.175	-1.364	8.17e-17
SHC3	ENSG00000148082.9	1.47	6.44	-1.591	2.29e-50
SH3GLB2	ENSG00000148341.17	34.27	91.42	-1.39	6.25e-24
FAM171A1	ENSG00000148468.16	9.89	3.605	1.242	2.12e-17
SERPING1	ENSG00000149131.15	20.33	126.04	-2.574	2.23e-29
TTC12	ENSG00000149292.16	3.4	8.76	-1.149	1.72e-21
NCAM1	ENSG00000149294.16	19.849	41.196	-1.017	5.87e-8
ST14	ENSG00000149418.10	0.8	3.155	-1.207	4.06e-14
TKFC	ENSG00000149476.14	41.801	218.978	-2.362	1.34e-31
TMEM138	ENSG00000149483.11	58.74	132.449	-1.16	2.85e-15
ROM1	ENSG00000149489.8	2.16	6.545	-1.256	1.71e-21
PLCH2	ENSG00000149527.17	0.27	1.86	-1.171	1.58e-10
FEZ1	ENSG00000149557.12	17.47	5.465	1.514	1.84e-11
SIDT2	ENSG00000149577.15	13.29	29.381	-1.088	2.18e-20
TMEM25	ENSG00000149582.15	10.03	26.414	-1.313	1.28e-16
TAGLN	ENSG00000149591.16	58.221	365.644	-2.63	1.06e-31
PLCB3	ENSG00000149782.11	7.21	17.255	-1.153	9.77e-23
PCDH15	ENSG00000150275.17	0.06	3.01	-1.92	1.91e-52
GPM6A	ENSG00000150625.16	0.13	2.1	-1.456	5.86e-38
IL18	ENSG00000150782.11	1.84	5.725	-1.244	6.94e-7
UBC	ENSG00000150991.14	1224.52	579.433	1.078	2.33e-10
THRB	ENSG00000151090.17	0.94	3.58	-1.239	3.77e-28
KCTD14	ENSG00000151364.15	5.99	19.929	-1.582	9.84e-20
THRSP	ENSG00000151365.2	0.18	1.43	-1.042	1.60e-14
ME3	ENSG00000151376.16	9.93	23.88	-1.187	1.86e-25
NEK7	ENSG00000151414.14	12.94	34.854	-1.363	2.43e-19
FRMD4A	ENSG00000151474.19	2.04	6.88	-1.374	1.04e-22
EPS8	ENSG00000151491.12	4.17	11.389	-1.261	1.56e-14
VENTX	ENSG00000151650.7	0.13	1.675	-1.243	6.07e-32
PTPN14	ENSG00000152104.11	2.17	6.95	-1.326	2.25e-35
HSPB8	ENSG00000152137.6	84.788	8.614	3.158	5.32e-18
TMEM178A	ENSG00000152154.10	1.29	4.425	-1.244	1.16e-21
ZFP36L2	ENSG00000152518.6	19.22	58.871	-1.566	1.55e-21
PLEKHH2	ENSG00000152527.13	0.91	3.21	-1.14	1.57e-23
IGSF10	ENSG00000152580.8	0.09	4.615	-2.365	2.56e-23
GJA1	ENSG00000152661.7	82.412	244.704	-1.559	6.69e-16
ZNF117	ENSG00000152926.14	5.23	21.565	-1.857	1.07e-27
RAB3C	ENSG00000152932.7	2.91	0.935	1.015	1.80e-6
SREK1IP1	ENSG00000153006.14	13.86	5.205	1.26	1.46e-31
MERTK	ENSG00000153208.16	17.93	40.279	-1.125	3.45e-10
NR4A2	ENSG00000153234.13	0.98	4.704	-1.527	9.27e-12
SLC25A27	ENSG00000153291.15	6.03	19.78	-1.564	8.40e-31
UBP1	ENSG00000153560.11	10.22	23.564	-1.13	9.59e-24
PID1	ENSG00000153823.18	3.65	22.67	-2.348	4.20e-34
KCTD15	ENSG00000153885.14	1.33	4.635	-1.274	4.03e-21
MCOLN2	ENSG00000153898.12	1.45	11.659	-2.369	1.06e-31
LGI4	ENSG00000153902.13	0.3	2	-1.206	5.55e-18
ROBO3	ENSG00000154134.14	2.24	16.349	-2.421	4.85e-33
PRKCA	ENSG00000154229.11	6.47	17.745	-1.327	1.94e-12
LRRK1	ENSG00000154237.12	0.54	2.45	-1.164	8.97e-39
UCHL1	ENSG00000154277.12	6.54	40.308	-2.454	7.30e-12
PGM5	ENSG00000154330.12	16.14	51.355	-1.611	3.93e-13
SORBS2	ENSG00000154556.17	27.66	189.282	-2.731	4.44e-27
NCAM2	ENSG00000154654.14	0.85	4.84	-1.658	1.15e-16
L3MBTL4	ENSG00000154655.14	0.75	3.66	-1.413	2.52e-54
JAM2	ENSG00000154721.14	4.17	15.055	-1.635	5.47e-9
FLCN	ENSG00000154803.12	11.41	23.985	-1.009	8.80e-14
PPP4R1	ENSG00000154845.15	9.08	20.87	-1.117	2.95e-19
MARVELD1	ENSG00000155254.12	2.07	7.37	-1.447	5.69e-13
GRAMD3	ENSG00000155324.9	2.62	10.56	-1.675	2.30e-25
VSIG4	ENSG00000155659.14	6.04	55.589	-3.007	7.67e-26
SLA	ENSG00000155926.13	1.25	7.735	-1.957	2.18e-31
PSD3	ENSG00000156011.16	6.02	13.04	-1	7.76e-13
GNA14	ENSG00000156049.6	0.28	1.635	-1.042	1.17e-23
TSPAN7	ENSG00000156298.12	126.956	59.104	1.09	2.73e-7
MAPK13	ENSG00000156711.16	14.56	51.766	-1.762	4.26e-25
RBPMS	ENSG00000157110.15	36.801	92.77	-1.311	3.98e-18
TIMP4	ENSG00000157150.4	0.45	5.53	-2.171	8.40e-29
RP11-66N24.4	ENSG00000157306.14	1.07	4.795	-1.485	1.99e-51
IL34	ENSG00000157368.10	3.95	14.955	-1.689	5.15e-7
KIT	ENSG00000157404.15	1.51	0.24	1.017	1.13e-21
MUM1L1	ENSG00000157502.12	0.02	2.59	-1.815	5.81e-23
PSMG3	ENSG00000157778.8	48.02	21.69	1.111	8.74e-24
FMNL2	ENSG00000157827.19	6.54	20.359	-1.502	7.76e-28
TNFRSF14	ENSG00000157873.17	29.41	98.499	-1.71	6.16e-22
SKI	ENSG00000157933.9	5.16	11.705	-1.044	2.71e-20
KRTCAP3	ENSG00000157992.12	0.73	3.375	-1.339	6.82e-23
HPD	ENSG00000158104.11	0.14	4.755	-2.336	4.49e-21
MRAS	ENSG00000158186.12	18.78	54.894	-1.499	4.37e-22
RNF207	ENSG00000158286.12	1.32	9.485	-2.176	4.65e-45
TMSB15B	ENSG00000158427.14	3.39	0.55	1.502	2.47e-26
PPP1R9A	ENSG00000158528.11	1.76	5.75	-1.29	9.17e-19
GDPD5	ENSG00000158555.14	2.03	6.785	-1.361	2.80e-18
SLAMF8	ENSG00000158714.10	0.94	3.39	-1.178	7.00e-12
SLC45A3	ENSG00000158715.5	0.89	4.98	-1.662	5.31e-38
NBL1	ENSG00000158747.13	5.96	13.545	-1.063	9.98e-6
NIT1	ENSG00000158793.13	35.25	81.41	-1.185	2.65e-15
ZNF276	ENSG00000158805.11	9.26	20.085	-1.039	1.42e-25
NPM2	ENSG00000158806.13	0.79	18.94	-3.478	1.97e-45
FGF17	ENSG00000158815.10	0.11	3.315	-1.959	1.05e-57
FAM160B2	ENSG00000158863.21	21.63	45.509	-1.039	1.23e-22
NDUFS2	ENSG00000158864.12	65.748	138.202	-1.06	3.13e-17
FCER1G	ENSG00000158869.10	23.119	68.18	-1.52	3.43e-14
MPZ	ENSG00000158887.15	0.81	2.885	-1.102	6.63e-11
EPB41	ENSG00000159023.18	4.57	12.21	-1.246	4.61e-16
SV2A	ENSG00000159164.9	1.3	4.74	-1.319	1.91e-3
STC1	ENSG00000159167.11	6.46	0.48	2.334	1.10e-31
SCUBE1	ENSG00000159307.18	1.35	3.835	-1.041	1.04e-5
PTMS	ENSG00000159335.15	401.372	192.517	1.056	5.37e-10
HK2	ENSG00000159399.9	5.76	1.729	1.308	1.05e-9
THEM4	ENSG00000159445.12	8.81	20.51	-1.133	2.85e-24
SPON2	ENSG00000159674.11	3.84	39.044	-3.048	9.44e-36
TPPP3	ENSG00000159713.10	7.35	1.65	1.656	2.26e-11
ZYX	ENSG00000159840.15	31.241	64.98	-1.033	1.67e-12
NPR2	ENSG00000159899.14	3.71	13.09	-1.581	4.09e-15
PTGIR	ENSG00000160013.8	0.81	5.19	-1.774	1.25e-35
FNDC5	ENSG00000160097.15	3.09	17.74	-2.196	2.04e-32
TFF3	ENSG00000160180.15	1.84	8.059	-1.673	2.08e-21
SLC37A1	ENSG00000160190.13	3.29	7.9	-1.053	3.05e-22
CBS	ENSG00000160200.17	0.57	2.53	-1.169	7.94e-4
ITGB2	ENSG00000160255.16	7.63	18.87	-1.203	1.68e-6
S100B	ENSG00000160307.9	0.25	3.54	-1.861	2.24e-22
FCN2	ENSG00000160339.15	3.04	17.355	-2.184	2.52e-14
PCSK7	ENSG00000160613.12	8.44	19.815	-1.141	1.32e-28
S100A1	ENSG00000160678.11	0.6	2.42	-1.096	2.70e-14
SHC1	ENSG00000160691.18	38.109	85.644	-1.148	2.38e-15
NLRX1	ENSG00000160703.15	4.87	10.91	-1.021	3.98e-14
NBEAL2	ENSG00000160796.16	7.22	28.1	-1.824	2.38e-31
PTH1R	ENSG00000160801.13	2.68	38.124	-3.41	2.76e-52
MYL3	ENSG00000160808.9	0.21	2.725	-1.622	5.10e-52
PPP1R35	ENSG00000160813.6	13.94	31.1	-1.103	6.38e-14
HK3	ENSG00000160883.10	0.85	8.445	-2.352	7.87e-37
LY6E	ENSG00000160932.10	528.55	174.428	1.594	1.11e-14
RECQL4	ENSG00000160957.12	5.77	2.38	1.002	7.22e-16
RACGAP1	ENSG00000161800.12	7.16	2.2	1.351	1.48e-20
GRASP	ENSG00000161835.10	2.1	9.85	-1.807	3.95e-34
SCIMP	ENSG00000161929.14	0.31	1.635	-1.008	3.12e-19
TNFSF13	ENSG00000161955.16	10.01	22.1	-1.069	3.25e-11
FGF11	ENSG00000161958.10	3.36	23.299	-2.478	2.50e-16
PAQR4	ENSG00000162073.13	25.849	6.555	1.829	6.15e-28
FLYWCH2	ENSG00000162076.12	119.651	33.61	1.802	7.54e-36
ZG16B	ENSG00000162078.11	9.93	0.625	2.75	2.75e-22
NEU3	ENSG00000162139.9	4.05	10.3	-1.162	1.34e-27
ITIH3	ENSG00000162267.12	0.4	1.954	-1.077	5.87e-4
TPCN2	ENSG00000162341.15	2.18	6.615	-1.26	2.50e-45
PDZK1IP1	ENSG00000162366.7	1.62	7.03	-1.616	4.83e-4
PPAP2B	ENSG00000162407.8	11.58	35.3	-1.529	2.45e-19
ZSWIM5	ENSG00000162415.6	2.64	10.555	-1.666	2.69e-33
RBP7	ENSG00000162444.11	32.459	9.233	1.709	1.54e-29
FBLIM1	ENSG00000162458.12	4.79	17.289	-1.659	5.39e-17
SLC25A34	ENSG00000162461.7	0.51	3.39	-1.54	1.19e-40
PDPN	ENSG00000162493.16	0.3	2.405	-1.389	4.58e-8
LRRC38	ENSG00000162494.5	0.05	9.95	-3.382	3.99e-23
LAPTM5	ENSG00000162511.7	20.369	46.499	-1.152	8.24e-6
TSSK3	ENSG00000162526.6	0.42	2.145	-1.147	3.58e-35
SCNN1D	ENSG00000162572.19	2.15	5.315	-1.003	1.19e-21
MXRA8	ENSG00000162576.16	8.95	29.88	-1.634	1.60e-10
MEGF6	ENSG00000162591.15	0.39	4.035	-1.857	2.80e-37
NFIA	ENSG00000162599.15	3.37	9.049	-1.201	1.59e-23
MYSM1	ENSG00000162601.9	2.24	8.965	-1.621	1.59e-51
FUBP1	ENSG00000162613.16	24.88	64.504	-1.34	1.69e-28
NEXN	ENSG00000162614.18	2.74	15.885	-2.175	5.41e-39
WDR63	ENSG00000162643.12	3.55	8.39	-1.045	5.17e-6
GBP2	ENSG00000162645.12	32.88	96.191	-1.52	2.14e-15
MT2P1	ENSG00000162840.4	0	4.06	-2.339	3.03e-15
KLHDC8A	ENSG00000162873.14	0.82	18.254	-3.403	8.81e-26
PKDCC	ENSG00000162878.12	20.831	52.723	-1.299	4.35e-17
HAAO	ENSG00000162882.14	1.17	6.17	-1.724	4.67e-27
VSNL1	ENSG00000163032.11	0.43	9.33	-2.853	4.01e-14
SGPP2	ENSG00000163082.9	1.6	5.755	-1.377	2.27e-5
SPRR3	ENSG00000163209.14	0.15	1.925	-1.347	1.38e-14
S100A9	ENSG00000163220.10	5.11	89.906	-3.895	1.41e-33
TDRD10	ENSG00000163239.12	0.27	4.26	-2.05	1.49e-56
FZD5	ENSG00000163251.3	1.47	4.095	-1.045	2.27e-21
FAM19A4	ENSG00000163377.14	11.97	3.395	1.561	4.58e-10
FSTL1	ENSG00000163430.9	29.449	78.869	-1.391	2.98e-12
LMOD1	ENSG00000163431.12	2.37	33.711	-3.365	3.23e-33
STK36	ENSG00000163482.11	11.43	40.281	-1.732	6.11e-33
TGFBR2	ENSG00000163513.17	15.22	41.019	-1.373	4.06e-18
NFASC	ENSG00000163531.15	2.92	15.175	-2.045	2.87e-22
SERPINI1	ENSG00000163536.12	7.45	3.205	1.007	4.91e-11
MNDA	ENSG00000163563.7	1.04	6.27	-1.833	4.39e-15
ICA1L	ENSG00000163596.16	1.4	3.845	-1.013	1.19e-34
PTX3	ENSG00000163661.3	0.27	2.83	-1.593	1.72e-11
SMIM14	ENSG00000163683.11	25.77	52.804	-1.007	3.66e-6
PCOLCE2	ENSG00000163710.7	9.3	2.385	1.605	3.38e-13
TTC14	ENSG00000163728.10	6.66	18.445	-1.344	1.74e-33
PLB1	ENSG00000163803.12	1.27	4.425	-1.257	8.50e-10
ZC3H12A	ENSG00000163874.8	2.92	10.335	-1.532	7.25e-27
RPL39L	ENSG00000163923.9	7.97	2.455	1.376	5.93e-15
UVSSA	ENSG00000163945.15	2.02	7.37	-1.471	1.48e-31
SLC51A	ENSG00000163959.9	5.59	16.365	-1.398	7.04e-4
ERMAP	ENSG00000164010.13	4.21	9.615	-1.027	1.35e-21
H2AFZ	ENSG00000164032.11	220.708	80.934	1.436	2.16e-19
PLXNB1	ENSG00000164050.12	3.03	11.34	-1.614	2.94e-28
PPM1M	ENSG00000164088.17	4.49	12.185	-1.264	6.20e-19
ETNPPL	ENSG00000164089.8	0.52	3.828	-1.667	2.00e-7
HMGB2	ENSG00000164104.11	57.42	22.715	1.301	2.01e-22
MAD2L1	ENSG00000164109.13	11.14	2.18	1.933	4.39e-29
HPGD	ENSG00000164120.13	10.06	2.84	1.526	4.63e-5
TMEM144	ENSG00000164124.10	5.41	13.7	-1.197	6.14e-17
FAM198B	ENSG00000164125.15	55.842	119.967	-1.09	9.79e-5
NPY1R	ENSG00000164128.6	1.35	19.775	-3.144	2.85e-51
NPY5R	ENSG00000164129.11	0.04	1.945	-1.502	1.32e-49
HHIP	ENSG00000164161.9	0.23	1.585	-1.071	2.56e-9
ITGA2	ENSG00000164171.10	1.85	5.955	-1.287	9.37e-11
NDUFS4	ENSG00000164258.11	138.217	68.18	1.009	5.32e-15
ESM1	ENSG00000164283.12	12.3	0.49	3.158	1.07e-49
GPX8	ENSG00000164294.13	36.181	6.99	2.218	3.53e-42
UQCRQ	ENSG00000164405.10	713.316	321.761	1.146	2.03e-18
SAMD3	ENSG00000164483.16	0.38	2.005	-1.123	1.19e-23
TMEM200A	ENSG00000164484.11	2.12	11.82	-2.039	7.70e-19
PTTG1	ENSG00000164611.12	31.33	3.085	2.984	6.15e-35
SHH	ENSG00000164690.7	1.69	4.72	-1.088	1.14e-4
[truncated: 1,197 more rows]

## Sheet: Table SII
Table SII. Expression levels of EFNA3 in cancer and normal tissues of various types of cancer.
Sample ID	Group	Tumor type	EFNA3 expression level
GTEX-111CU-0126-SM-5GZWZ	Normal	ACC	1.51096
GTEX-111YS-0126-SM-5987T	Normal	ACC	1.0566
GTEX-1122O-0326-SM-5H124	Normal	ACC	1.11105
GTEX-11DXX-0126-SM-5EGH7	Normal	ACC	1.93357
GTEX-11DXY-1626-SM-5H12L	Normal	ACC	1.78243
GTEX-11DXZ-0226-SM-5EGGZ	Normal	ACC	1.5059
GTEX-11EMC-0526-SM-5EGJN	Normal	ACC	1.32769
GTEX-11EQ9-0126-SM-5986I	Normal	ACC	1.46991
GTEX-11GSP-0326-SM-5A5KW	Normal	ACC	1.541
GTEX-11I78-1826-SM-5A5M4	Normal	ACC	1.46467
GTEX-11NSD-0226-SM-5A5LR	Normal	ACC	1.88753
GTEX-11P7K-0126-SM-5986E	Normal	ACC	1.46991
GTEX-11TT1-0126-SM-5LUAA	Normal	ACC	1.19535
GTEX-11XUK-0126-SM-5CVLK	Normal	ACC	1.04263
GTEX-1211K-0126-SM-59HJE	Normal	ACC	1.29868
GTEX-12696-0626-SM-5EGGD	Normal	ACC	2.22651
GTEX-12WSD-2126-SM-5LZWK	Normal	ACC	1.37293
GTEX-12WSG-0726-SM-5EGIG	Normal	ACC	1.8914
GTEX-12WSJ-0126-SM-5GCOM	Normal	ACC	0.963466
GTEX-12WSK-0326-SM-5GCOJ	Normal	ACC	0.74845
GTEX-12WSL-0326-SM-5CVMK	Normal	ACC	1.74418
GTEX-12WSN-0926-SM-5GCN1	Normal	ACC	0.76554
GTEX-13111-0326-SM-5DUXF	Normal	ACC	1.02858
GTEX-131XF-0126-SM-5DUVF	Normal	ACC	1.52104
GTEX-131XG-1326-SM-5DUX4	Normal	ACC	2.14078
GTEX-132AR-1726-SM-5EGHQ	Normal	ACC	1.46991
GTEX-132QS-0126-SM-5IFH9	Normal	ACC	1.52607
GTEX-1399R-0326-SM-5KM1X	Normal	ACC	1.57044
GTEX-1399S-0426-SM-5IFG5	Normal	ACC	1.48543
GTEX-1399U-0226-SM-5P9J2	Normal	ACC	1.48543
GTEX-139YR-0126-SM-5IJEY	Normal	ACC	1.73983
GTEX-13D11-0426-SM-5LZYA	Normal	ACC	1.29868
GTEX-13FH7-0226-SM-5IFGG	Normal	ACC	1.24487
GTEX-13FTW-0126-SM-5IJED	Normal	ACC	1.40597
GTEX-13N11-0826-SM-5IJFP	Normal	ACC	1.95237
GTEX-13O1R-2326-SM-5IJF9	Normal	ACC	1.16994
GTEX-13O21-0126-SM-5IJE8	Normal	ACC	1.2869
GTEX-13O3O-1626-SM-5KM1O	Normal	ACC	1.69154
GTEX-13O61-0126-SM-5KM4P	Normal	ACC	1.72249
GTEX-13OVI-1226-SM-5J2ME	Normal	ACC	1.32769
GTEX-13OW7-2726-SM-5L3HN	Normal	ACC	0.97085
GTEX-13PL7-1026-SM-5MR5C	Normal	ACC	2.51602
GTEX-13PVR-0226-SM-5RQJI	Normal	ACC	1.07038
GTEX-13W3W-1326-SM-5LU4T	Normal	ACC	1.40597
GTEX-145LT-0126-SM-5S2QJ	Normal	ACC	1.26902
GTEX-145MN-0226-SM-5QGPY	Normal	ACC	0.963466
GTEX-146FR-1526-SM-5SIB8	Normal	ACC	1.12432
GTEX-14753-1726-SM-5NQ9X	Normal	ACC	0.89531
GTEX-147F4-2526-SM-5NQBB	Normal	ACC	2.50332
GTEX-148VJ-1626-SM-5QGPH	Normal	ACC	1.29275
GTEX-14A5I-2126-SM-5NQA8	Normal	ACC	1.58495
GTEX-14BMU-0126-SM-5S2Q9	Normal	ACC	2.12102
GTEX-14DAQ-1826-SM-5S2VV	Normal	ACC	1.02858
GTEX-14H4A-0226-SM-5SI6Q	Normal	ACC	1.42222
GTEX-NFK9-1726-SM-3TW8P	Normal	ACC	1.2869
GTEX-O5YT-1326-SM-3MJGR	Normal	ACC	1.5059
GTEX-O5YV-1126-SM-3LK73	Normal	ACC	2.3477
GTEX-OHPK-1326-SM-3MJGN	Normal	ACC	0.948623
GTEX-OHPL-1326-SM-3MJGG	Normal	ACC	1.55087
GTEX-OIZH-1326-SM-3NB1H	Normal	ACC	1.73115
GTEX-OOBK-3125-SM-3LK5R	Normal	ACC	1.60409
GTEX-OXRK-0126-SM-3NB1E	Normal	ACC	2.00357
GTEX-P4QS-1326-SM-3NMCD	Normal	ACC	1.35616
GTEX-PLZ5-0326-SM-3P614	Normal	ACC	2.22651
GTEX-PLZ6-0226-SM-3P61I	Normal	ACC	1.29868
GTEX-PWCY-0226-SM-48TD8	Normal	ACC	1.35616
GTEX-Q2AH-0126-SM-48U2B	Normal	ACC	1.31616
GTEX-Q2AI-0226-SM-48U1D	Normal	ACC	1.65993
GTEX-Q734-0126-SM-48U1E	Normal	ACC	1.64614
GTEX-QCQG-0126-SM-48U27	Normal	ACC	1.5059
GTEX-QDVN-0426-SM-48TZ6	Normal	ACC	1.12432
GTEX-QEG5-1826-SM-4R1JP	Normal	ACC	2.44362
GTEX-QLQ7-0126-SM-4R1JW	Normal	ACC	1.61822
GTEX-QLQW-0226-SM-447BJ	Normal	ACC	1.56071
GTEX-QMRM-0126-SM-4R1K9	Normal	ACC	1.81966
GTEX-QXCU-1326-SM-48FE2	Normal	ACC	1.6135
GTEX-R53T-0226-SM-48FEH	Normal	ACC	2.21724
GTEX-R55C-0226-SM-48FEO	Normal	ACC	1.87579
GTEX-R55G-0126-SM-48FDS	Normal	ACC	1.2265
GTEX-REY6-1726-SM-48FDL	Normal	ACC	3.06526
GTEX-RUSQ-0226-SM-47JWT	Normal	ACC	1.67356
GTEX-RWSA-1726-SM-47JX7	Normal	ACC	1.15703
GTEX-S32W-0126-SM-4AD61	Normal	ACC	2.02857
GTEX-S341-0126-SM-4AD64	Normal	ACC	1.31036
GTEX-S4Q7-0226-SM-4AD5O	Normal	ACC	1.07726
GTEX-SUCS-0526-SM-4DM56	Normal	ACC	1.76551
GTEX-T6MO-0126-SM-4DM6X	Normal	ACC	1.48543
GTEX-TKQ2-0226-SM-4DM6V	Normal	ACC	1.546
GTEX-U3ZM-0226-SM-4DXTA	Normal	ACC	1.79074
GTEX-U3ZN-0826-SM-4DXSZ	Normal	ACC	1.546
GTEX-U4B1-0126-SM-4DXSN	Normal	ACC	1.93734
GTEX-V1D1-0226-SM-4JBHG	Normal	ACC	1.45417
GTEX-V955-0126-SM-4JBH5	Normal	ACC	2.02857
GTEX-VJYA-0526-SM-4KL1R	Normal	ACC	1.35616
GTEX-VUSG-1526-SM-4KKZH	Normal	ACC	2.31324
GTEX-WFG8-0126-SM-4LVMH	Normal	ACC	1.20791
GTEX-WFG8-0126-SM-5CHTB	Normal	ACC	0
GTEX-WHPG-1526-SM-4M1ZK	Normal	ACC	1.23881
GTEX-WQUQ-0126-SM-4OOSS	Normal	ACC	1.68705
GTEX-WY7C-0326-SM-4OND5	Normal	ACC	1.88753
GTEX-WYVS-0226-SM-4ONDK	Normal	ACC	1.48029
GTEX-X4EO-1726-SM-4QARN	Normal	ACC	1.02146
GTEX-X4LF-0126-SM-4QAS7	Normal	ACC	1.275
GTEX-XMK1-0226-SM-4B65D	Normal	ACC	1.64614
GTEX-XQ3S-1726-SM-4BOOD	Normal	ACC	1.23881
GTEX-XUZC-0226-SM-4BOO7	Normal	ACC	1.58975
GTEX-XV7Q-0226-SM-4BRVL	Normal	ACC	2.04612
GTEX-XYKS-0926-SM-4BRVG	Normal	ACC	1.74846
GTEX-Y114-0526-SM-4TT8V	Normal	ACC	0.978174
GTEX-Y3IK-0226-SM-51MRJ	Normal	ACC	1.74418
GTEX-Y5V5-1326-SM-4V6G9	Normal	ACC	1.50078
GTEX-Y5V6-1926-SM-5IFIL	Normal	ACC	1.70927
GTEX-Y9LG-0126-SM-5Q59W	Normal	ACC	1.55582
GTEX-YB5E-0226-SM-5IFHI	Normal	ACC	1.14405
GTEX-YF7O-0126-SM-5IFIR	Normal	ACC	1.4489
GTEX-YFCO-0126-SM-4W1YT	Normal	ACC	1.52104
GTEX-ZA64-0226-SM-5HL9C	Normal	ACC	1.07038
GTEX-ZDTT-0126-SM-4WKHA	Normal	ACC	1.2869
GTEX-ZF2S-0126-SM-4WKFO	Normal	ACC	1.7049
GTEX-ZLFU-0826-SM-4WWBP	Normal	ACC	1.11105
GTEX-ZLV1-0226-SM-4WWC1	Normal	ACC	1.04965
GTEX-ZLWG-0126-SM-4WWC5	Normal	ACC	1.10434
GTEX-ZVP2-0126-SM-5NQ7D	Normal	ACC	1.21411
GTEX-ZVT2-0826-SM-5GIEO	Normal	ACC	1.45417
GTEX-ZYFG-0926-SM-5BC5U	Normal	ACC	1.13748
GTEX-ZYVF-1626-SM-5N9EH	Normal	ACC	1.72682
GTEX-ZYWO-0126-SM-5GZWQ	Normal	ACC	1.35616
GTEX-ZZPU-1226-SM-5N9CK	Normal	ACC	1.6781
TCGA-OR-A5J8-01	Tumor	ACC	2.44362
TCGA-OR-A5JJ-01	Tumor	ACC	6.34326
TCGA-PK-A5HA-01	Tumor	ACC	2.12434
TCGA-PK-A5HB-01	Tumor	ACC	4.31395
TCGA-OR-A5LK-01	Tumor	ACC	1.29868
TCGA-OR-A5JG-01	Tumor	ACC	5.64646
TCGA-OR-A5JZ-01	Tumor	ACC	2.54596
TCGA-OR-A5L6-01	Tumor	ACC	1.94488
TCGA-OR-A5LB-01	Tumor	ACC	1.6369
TCGA-OR-A5J1-01	Tumor	ACC	5.10141
TCGA-OR-A5LT-01	Tumor	ACC	4.88367
TCGA-OR-A5JV-01	Tumor	ACC	1.55087
TCGA-OR-A5K3-01	Tumor	ACC	1.79907
TCGA-OR-A5JB-01	Tumor	ACC	2.80118
TCGA-OR-A5LD-01	Tumor	ACC	3.67924
TCGA-PA-A5YG-01	Tumor	ACC	0.739854
TCGA-OR-A5JX-01	Tumor	ACC	2.23265
TCGA-OR-A5JK-01	Tumor	ACC	1.31036
TCGA-OR-A5K1-01	Tumor	ACC	1.36178
TCGA-OR-A5JW-01	Tumor	ACC	3.35051
TCGA-OR-A5LG-01	Tumor	ACC	4.72794
TCGA-OR-A5JR-01	Tumor	ACC	1.11767
TCGA-OR-A5KZ-01	Tumor	ACC	2.88753
TCGA-PK-A5H8-01	Tumor	ACC	1.59457
TCGA-OR-A5JP-01	Tumor	ACC	3.82886
TCGA-OR-A5K8-01	Tumor	ACC	3.9059
TCGA-OR-A5JC-01	Tumor	ACC	2.46463
TCGA-OR-A5J5-01	Tumor	ACC	3.58133
TCGA-OR-A5LM-01	Tumor	ACC	2.9982
TCGA-OR-A5JI-01	Tumor	ACC	1.69154
TCGA-OR-A5LE-01	Tumor	ACC	6.07277
TCGA-OR-A5L5-01	Tumor	ACC	1.18905
TCGA-OR-A5LL-01	Tumor	ACC	5.89502
TCGA-OR-A5LC-01	Tumor	ACC	5.41547
TCGA-OR-A5JF-01	Tumor	ACC	3.92794
TCGA-OR-A5K0-01	Tumor	ACC	6.69528
TCGA-OR-A5JY-01	Tumor	ACC	5.16912
TCGA-OR-A5L3-01	Tumor	ACC	4.0461
TCGA-OR-A5JS-01	Tumor	ACC	6.45848
TCGA-OR-A5JT-01	Tumor	ACC	2.65765
TCGA-OR-A5K4-01	Tumor	ACC	2.58737
TCGA-OR-A5K9-01	Tumor	ACC	5.45552
TCGA-OR-A5LO-01	Tumor	ACC	3.23109
TCGA-OR-A5K5-01	Tumor	ACC	7.07096
TCGA-OR-A5JD-01	Tumor	ACC	1.37293
TCGA-OR-A5K6-01	Tumor	ACC	5.92246
TCGA-OR-A5KW-01	Tumor	ACC	3.03738
TCGA-P6-A5OF-01	Tumor	ACC	6.13298
TCGA-OR-A5LJ-01	Tumor	ACC	4.88946
TCGA-OR-A5JA-01	Tumor	ACC	4.35263
TCGA-OR-A5L9-01	Tumor	ACC	0.926
TCGA-OU-A5PI-01	Tumor	ACC	4.27124
TCGA-OR-A5LA-01	Tumor	ACC	1.13748
TCGA-OR-A5L4-01	Tumor	ACC	1.546
TCGA-P6-A5OG-01	Tumor	ACC	1.38408
TCGA-OR-A5J2-01	Tumor	ACC	3.74741
TCGA-OR-A5KT-01	Tumor	ACC	3.95515
TCGA-OR-A5KO-01	Tumor	ACC	4.96442
TCGA-OR-A5KU-01	Tumor	ACC	5.6645
TCGA-OR-A5LP-01	Tumor	ACC	2.2141
TCGA-OR-A5JL-01	Tumor	ACC	1.61822
TCGA-OR-A5L8-01	Tumor	ACC	5.68401
TCGA-OR-A5LH-01	Tumor	ACC	2.5777
TCGA-OR-A5LS-01	Tumor	ACC	4.59874
TCGA-OR-A5LN-01	Tumor	ACC	0.815589
TCGA-OR-A5J7-01	Tumor	ACC	3.53603
TCGA-OR-A5J6-01	Tumor	ACC	1.14405
TCGA-PK-A5H9-01	Tumor	ACC	1.49058
TCGA-OR-A5JO-01	Tumor	ACC	1.29868
TCGA-OR-A5JQ-01	Tumor	ACC	2.49567
TCGA-OR-A5JM-01	Tumor	ACC	4.69706
TCGA-OR-A5KX-01	Tumor	ACC	5.83114
TCGA-OR-A5J3-01	Tumor	ACC	4.27352
TCGA-OR-A5KY-01	Tumor	ACC	5.23499
TCGA-OR-A5J9-01	Tumor	ACC	5.9565
TCGA-OR-A5JE-01	Tumor	ACC	3.10771
TCGA-OR-A5KV-01	Tumor	ACC	7.70403
GTEX-S32W-1126-SM-4AD5V	Normal	BLCA	1.03564
GTEX-S3XE-1226-SM-4AD4L	Normal	BLCA	1.70046
GTEX-S4Q7-0926-SM-4AD5D	Normal	BLCA	1.38408
GTEX-S4UY-0926-SM-4AD6O	Normal	BLCA	1.84398
GTEX-SE5C-1026-SM-4BRUG	Normal	BLCA	1.26902
GTEX-SNMC-0826-SM-4DM66	Normal	BLCA	1.52104
GTEX-SNOS-0526-SM-4DM54	Normal	BLCA	2.17314
GTEX-U3ZM-0826-SM-4DXU6	Normal	BLCA	0.378503
GTEX-U4B1-1226-SM-4DXT7	Normal	BLCA	1.04263
TCGA-CU-A0YR-11	Normal	BLCA	1.33341
TCGA-BT-A20Q-11	Normal	BLCA	0.856001
TCGA-BT-A20N-11	Normal	BLCA	0.575314
TCGA-BT-A20W-11	Normal	BLCA	1.53104
TCGA-GC-A3BM-11	Normal	BLCA	0.97085
TCGA-BL-A13J-11	Normal	BLCA	0.62293
TCGA-CU-A0YN-11	Normal	BLCA	0.910726
TCGA-K4-A54R-11	Normal	BLCA	0.863959
TCGA-BT-A2LA-11	Normal	BLCA	1.275
TCGA-GD-A3OQ-11	Normal	BLCA	1.08407
TCGA-GC-A6I3-11	Normal	BLCA	1.36735
TCGA-GD-A3OP-11	Normal	BLCA	1.83187
TCGA-GC-A3WC-11	Normal	BLCA	0.956073
TCGA-BT-A20R-11	Normal	BLCA	0.286878
TCGA-K4-A3WV-11	Normal	BLCA	1.3505
TCGA-BT-A2LB-11	Normal	BLCA	3.61941
TCGA-BT-A20U-11	Normal	BLCA	4.22955
TCGA-K4-A5RI-11	Normal	BLCA	1.40055
TCGA-GD-A2C5-11	Normal	BLCA	2.16995
TCGA-UY-A8OC-01	Tumor	BLCA	2.342
TCGA-KQ-A41Q-01	Tumor	BLCA	3.00362
TCGA-DK-A3IK-01	Tumor	BLCA	2.58012
TCGA-GU-A762-01	Tumor	BLCA	1.3505
TCGA-K4-A3WU-01	Tumor	BLCA	2.37849
TCGA-FD-A3B5-01	Tumor	BLCA	5.20988
TCGA-UY-A9PE-01	Tumor	BLCA	2.56073
TCGA-CF-A9FH-01	Tumor	BLCA	2.02502
TCGA-CF-A9FL-01	Tumor	BLCA	1.13095
TCGA-DK-A3X2-01	Tumor	BLCA	4.14571
TCGA-G2-A2ES-01	Tumor	BLCA	3.18266
TCGA-XF-A9SW-01	Tumor	BLCA	2.75062
TCGA-CU-A0YO-01	Tumor	BLCA	1.36178
TCGA-DK-A1AE-01	Tumor	BLCA	1.34485
TCGA-FD-A43X-01	Tumor	BLCA	2.26907
TCGA-FD-A5BT-01	Tumor	BLCA	0.773987
TCGA-KQ-A41O-01	Tumor	BLCA	1.93357
TCGA-2F-A9KT-01	Tumor	BLCA	2.92975
TCGA-CU-A0YR-01	Tumor	BLCA	1.6135
TCGA-K4-A4AC-01	Tumor	BLCA	2.37291
TCGA-S5-A6DX-01	Tumor	BLCA	1.70046
TCGA-XF-A9SJ-01	Tumor	BLCA	2.54845
TCGA-ZF-A9R4-01	Tumor	BLCA	2.07724
TCGA-DK-AA75-01	Tumor	BLCA	3.11938
TCGA-FD-A5BX-01	Tumor	BLCA	0.948623
TCGA-FD-A6TB-01	Tumor	BLCA	3.63577
TCGA-SY-A9G0-01	Tumor	BLCA	1.6369
TCGA-XF-A9SV-01	Tumor	BLCA	3.32194
TCGA-ZF-A9R0-01	Tumor	BLCA	2.90302
TCGA-DK-A2I6-01	Tumor	BLCA	4.0444
TCGA-E7-A677-01	Tumor	BLCA	2.44093
TCGA-GU-A767-01	Tumor	BLCA	1.42222
TCGA-ZF-A9R1-01	Tumor	BLCA	2.20164
TCGA-4Z-AA81-01	Tumor	BLCA	2.58012
TCGA-BT-A3PK-01	Tumor	BLCA	2.35333
TCGA-UY-A78N-01	Tumor	BLCA	2.10433
TCGA-UY-A9PD-01	Tumor	BLCA	2.46201
TCGA-XF-A8HF-01	Tumor	BLCA	1.61822
TCGA-XF-AAMH-01	Tumor	BLCA	3.32482
TCGA-4Z-AA7Q-01	Tumor	BLCA	1.72682
TCGA-DK-A1A5-01	Tumor	BLCA	2.7634
TCGA-DK-A2I4-01	Tumor	BLCA	2.41414
TCGA-FD-A3SN-01	Tumor	BLCA	3.18426
TCGA-GC-A3OO-01	Tumor	BLCA	2.91646
TCGA-GV-A3QF-01	Tumor	BLCA	2.43293
TCGA-XF-A8HC-01	Tumor	BLCA	2.848
TCGA-XF-A9SZ-01	Tumor	BLCA	4.29277
TCGA-DK-AA6W-01	Tumor	BLCA	4.27427
TCGA-HQ-A5ND-01	Tumor	BLCA	3.01974
TCGA-LC-A66R-01	Tumor	BLCA	2.64151
TCGA-XF-AAMY-01	Tumor	BLCA	2.92601
TCGA-C4-A0F7-01	Tumor	BLCA	3.31321
TCGA-FD-A6TD-01	Tumor	BLCA	1.77399
TCGA-G2-A2EL-01	Tumor	BLCA	3.86395
TCGA-G2-AA3F-01	Tumor	BLCA	2.37849
TCGA-GV-A40G-01	Tumor	BLCA	4.98097
TCGA-K4-A83P-01	Tumor	BLCA	2.10771
TCGA-UY-A9PF-01	Tumor	BLCA	2.01794
TCGA-XF-A8HD-01	Tumor	BLCA	2.58495
TCGA-ZF-A9RC-01	Tumor	BLCA	2.46988
TCGA-BT-A3PH-01	Tumor	BLCA	3.65988
TCGA-BT-A3PJ-01	Tumor	BLCA	2.30159
TCGA-CU-A72E-01	Tumor	BLCA	3.49824
TCGA-DK-A3IM-01	Tumor	BLCA	4.58561
TCGA-FD-A43N-01	Tumor	BLCA	3.66219
TCGA-FD-A62P-01	Tumor	BLCA	2.47513
TCGA-FJ-A3Z7-01	Tumor	BLCA	1.43827
TCGA-FT-A61P-01	Tumor	BLCA	2.28392
TCGA-K4-A4AB-01	Tumor	BLCA	3.45946
TCGA-KQ-A41P-01	Tumor	BLCA	3.5993
TCGA-XF-A9SM-01	Tumor	BLCA	2.86593
TCGA-XF-AAN3-01	Tumor	BLCA	3.466
TCGA-BT-A0S7-01	Tumor	BLCA	3.0635
TCGA-BT-A20J-01	Tumor	BLCA	1.21411
TCGA-BT-A20O-01	Tumor	BLCA	1.31036
TCGA-CF-A3MH-01	Tumor	BLCA	2.53106
TCGA-CU-A3KJ-01	Tumor	BLCA	2.25395
TCGA-DK-AA74-01	Tumor	BLCA	1.43827
TCGA-E7-A6ME-01	Tumor	BLCA	3.59453
TCGA-FD-A3B6-01	Tumor	BLCA	1.97088
TCGA-GU-AATO-01	Tumor	BLCA	3.26608
TCGA-GV-A40E-01	Tumor	BLCA	2.11102
TCGA-K4-A5RJ-01	Tumor	BLCA	1.30451
TCGA-MV-A51V-01	Tumor	BLCA	1.98185
TCGA-XF-AAML-01	Tumor	BLCA	3.53109
TCGA-ZF-A9R2-01	Tumor	BLCA	2.43024
TCGA-BT-A42E-01	Tumor	BLCA	2.48539
TCGA-DK-A3IQ-01	Tumor	BLCA	1.94111
TCGA-FD-A43P-01	Tumor	BLCA	3.00003
TCGA-FD-A62O-01	Tumor	BLCA	1.29868
TCGA-GU-AATP-01	Tumor	BLCA	2.31612
TCGA-GV-A3JW-01	Tumor	BLCA	1.99997
TCGA-ZF-A9RF-01	Tumor	BLCA	2.13754
TCGA-ZF-AA4N-01	Tumor	BLCA	2.26004
TCGA-4Z-AA7R-01	Tumor	BLCA	2.57046
TCGA-4Z-AA80-01	Tumor	BLCA	3.52981
TCGA-BL-A0C8-01	Tumor	BLCA	1.35801
TCGA-BT-A20Q-01	Tumor	BLCA	2.27502
TCGA-E7-A7DU-01	Tumor	BLCA	1.89915
TCGA-E7-A97P-01	Tumor	BLCA	2.61117
TCGA-FD-A6TG-01	Tumor	BLCA	1.97088
TCGA-FD-A6TI-01	Tumor	BLCA	2.23572
TCGA-FJ-A3ZF-01	Tumor	BLCA	3.05488
TCGA-KQ-A41N-01	Tumor	BLCA	2.29569
TCGA-UY-A9PH-01	Tumor	BLCA	1.97819
TCGA-XF-AAN2-01	Tumor	BLCA	3.33059
TCGA-4Z-AA87-01	Tumor	BLCA	2.26004
TCGA-BT-A20N-01	Tumor	BLCA	4.51285
TCGA-DK-A1AC-01	Tumor	BLCA	2.9542
TCGA-DK-A3IN-01	Tumor	BLCA	1.91456
TCGA-E5-A4U1-01	Tumor	BLCA	1.78662
TCGA-E7-A519-01	Tumor	BLCA	1.42762
TCGA-FJ-A3Z9-01	Tumor	BLCA	1.38958
TCGA-GU-A42P-01	Tumor	BLCA	3.53603
TCGA-GU-A763-01	Tumor	BLCA	1.32191
TCGA-BT-A20W-01	Tumor	BLCA	1.87579
TCGA-C4-A0F1-01	Tumor	BLCA	5.18429
TCGA-DK-AA71-01	Tumor	BLCA	2.82984
TCGA-GC-A4ZW-01	Tumor	BLCA	3.91841
TCGA-YC-A8S6-01	Tumor	BLCA	1.4489
TCGA-YC-A9TC-01	Tumor	BLCA	3.61473
TCGA-ZF-AA54-01	Tumor	BLCA	1.04965
TCGA-CU-A5W6-01	Tumor	BLCA	2.40869
TCGA-DK-A6AW-01	Tumor	BLCA	3.63108
TCGA-DK-A6B2-01	Tumor	BLCA	1.35616
TCGA-E7-A3X6-01	Tumor	BLCA	3.80526
TCGA-FD-A3SM-01	Tumor	BLCA	4.11441
TCGA-FD-A43U-01	Tumor	BLCA	2.37574
TCGA-GC-A3BM-01	Tumor	BLCA	2.23265
TCGA-PQ-A6FI-01	Tumor	BLCA	3.20163
TCGA-R3-A69X-01	Tumor	BLCA	1.99277
TCGA-XF-AAMJ-01	Tumor	BLCA	1.78662
TCGA-ZF-A9RM-01	Tumor	BLCA	2.67586
TCGA-ZF-AA4U-01	Tumor	BLCA	3.13258
TCGA-ZF-AA52-01	Tumor	BLCA	2.37574
TCGA-2F-A9KQ-01	Tumor	BLCA	2.5993
TCGA-DK-A1AD-01	Tumor	BLCA	2.78244
TCGA-FD-A3N5-01	Tumor	BLCA	4.72245
TCGA-FD-A62N-01	Tumor	BLCA	2.5993
TCGA-G2-A2EO-01	Tumor	BLCA	2.44362
TCGA-HQ-A2OE-01	Tumor	BLCA	2.19538
TCGA-K4-A5RH-01	Tumor	BLCA	2.30741
TCGA-XF-A8HG-01	Tumor	BLCA	2.04264
TCGA-XF-A9SL-01	Tumor	BLCA	1.46467
TCGA-DK-A3IS-01	Tumor	BLCA	2.30741
TCGA-DK-AA6R-01	Tumor	BLCA	2.98368
TCGA-FD-A3SO-01	Tumor	BLCA	4.28537
TCGA-FD-A3SR-01	Tumor	BLCA	3.64157
TCGA-FD-A5BS-01	Tumor	BLCA	0.956073
TCGA-GU-A42R-01	Tumor	BLCA	1.91456
TCGA-GU-AATQ-01	Tumor	BLCA	2.88753
TCGA-XF-A9ST-01	Tumor	BLCA	3.78976
TCGA-XF-A9T0-01	Tumor	BLCA	2.51346
TCGA-XF-AAN0-01	Tumor	BLCA	3.04441
TCGA-CF-A5UA-01	Tumor	BLCA	1.96716
TCGA-CU-A3YL-01	Tumor	BLCA	1.92221
TCGA-DK-A6B1-01	Tumor	BLCA	1.99637
TCGA-E7-A5KF-01	Tumor	BLCA	2.08067
TCGA-GU-A42Q-01	Tumor	BLCA	5.48123
TCGA-GV-A3QH-01	Tumor	BLCA	2.46726
TCGA-ZF-AA4R-01	Tumor	BLCA	4.03651
TCGA-2F-A9KP-01	Tumor	BLCA	2.53602
TCGA-4Z-AA7S-01	Tumor	BLCA	3.91365
TCGA-4Z-AA86-01	Tumor	BLCA	2.70925
TCGA-E7-A4XJ-01	Tumor	BLCA	2.67586
TCGA-E7-A541-01	Tumor	BLCA	1.95237
TCGA-E7-A6MD-01	Tumor	BLCA	1.49058
TCGA-E7-A7XN-01	Tumor	BLCA	3.37019
TCGA-FD-A3B7-01	Tumor	BLCA	2.75488
TCGA-FD-A3SS-01	Tumor	BLCA	3.22492
TCGA-G2-A3IB-01	Tumor	BLCA	4.33561
TCGA-G2-A3VY-01	Tumor	BLCA	2.49057
TCGA-G2-AA3C-01	Tumor	BLCA	0.963466
TCGA-GU-A764-01	Tumor	BLCA	2.50588
TCGA-GV-A3JV-01	Tumor	BLCA	1.10434
TCGA-K4-A3WS-01	Tumor	BLCA	1.47509
TCGA-SY-A9G5-01	Tumor	BLCA	2.04612
TCGA-ZF-AA4V-01	Tumor	BLCA	3.07892
TCGA-4Z-AA7M-01	Tumor	BLCA	2.45939
TCGA-4Z-AA7N-01	Tumor	BLCA	2.54596
TCGA-BL-A13J-01	Tumor	BLCA	3.88981
TCGA-DK-A1AG-01	Tumor	BLCA	3.211
TCGA-FD-A43Y-01	Tumor	BLCA	2.73122
TCGA-FJ-A3ZE-01	Tumor	BLCA	3.35195
TCGA-GV-A3QG-01	Tumor	BLCA	2.61117
TCGA-XF-A9SK-01	Tumor	BLCA	4.49507
TCGA-ZF-AA4T-01	Tumor	BLCA	3.08915
TCGA-ZF-AA5P-01	Tumor	BLCA	2.32196
TCGA-4Z-AA7O-01	Tumor	BLCA	3.36874
TCGA-BT-A42C-01	Tumor	BLCA	3.0215
TCGA-BT-A42F-01	Tumor	BLCA	5.03475
TCGA-DK-AA6U-01	Tumor	BLCA	2.76767
TCGA-E5-A4TZ-01	Tumor	BLCA	3.20788
TCGA-E7-A85H-01	Tumor	BLCA	2.08067
TCGA-GD-A6C6-01	Tumor	BLCA	0.903017
TCGA-K4-A6MB-01	Tumor	BLCA	3.68486
TCGA-XF-A9T8-01	Tumor	BLCA	2.66902
TCGA-2F-A9KO-01	Tumor	BLCA	2.02857
TCGA-BT-A20T-01	Tumor	BLCA	2.0356
TCGA-DK-AA6T-01	Tumor	BLCA	1.70046
TCGA-DK-AA6X-01	Tumor	BLCA	2.3363
TCGA-E7-A7PW-01	Tumor	BLCA	2.50588
TCGA-FD-A6TH-01	Tumor	BLCA	2.33053
TCGA-UY-A8OB-01	Tumor	BLCA	2.39232
TCGA-BL-A3JM-01	Tumor	BLCA	1.04965
TCGA-CF-A1HR-01	Tumor	BLCA	3.03563
TCGA-CF-A3MI-01	Tumor	BLCA	1.81966
TCGA-DK-A3IT-01	Tumor	BLCA	3.03738
TCGA-FD-A3SQ-01	Tumor	BLCA	2.48539
TCGA-GU-A766-01	Tumor	BLCA	1.04965
TCGA-UY-A78L-01	Tumor	BLCA	3.27648
TCGA-4Z-AA84-01	Tumor	BLCA	3.19379
TCGA-DK-A6B0-01	Tumor	BLCA	1.34485
TCGA-DK-AA77-01	Tumor	BLCA	3.19219
TCGA-FD-A5C0-01	Tumor	BLCA	3.65187
TCGA-GC-A3YS-01	Tumor	BLCA	3.48284
TCGA-ZF-A9RL-01	Tumor	BLCA	2.38406
TCGA-4Z-AA7Y-01	Tumor	BLCA	3.00178
TCGA-4Z-AA89-01	Tumor	BLCA	2.26606
TCGA-C4-A0F0-01	Tumor	BLCA	1.65535
TCGA-CF-A47X-01	Tumor	BLCA	1.78243
TCGA-CU-A0YN-01	Tumor	BLCA	3.16674
TCGA-DK-A1A3-01	Tumor	BLCA	2.36461
TCGA-DK-A3IV-01	Tumor	BLCA	3.19059
TCGA-DK-AA6S-01	Tumor	BLCA	2.24795
TCGA-FD-A3NA-01	Tumor	BLCA	2.32196
TCGA-FD-A3SL-01	Tumor	BLCA	2.19217
TCGA-FD-A3SP-01	Tumor	BLCA	2.33341
TCGA-FD-A6TK-01	Tumor	BLCA	1.32191
TCGA-G2-AA3D-01	Tumor	BLCA	2.19851
TCGA-UY-A78K-01	Tumor	BLCA	3.03211
TCGA-XF-AAN7-01	Tumor	BLCA	1.76551
TCGA-ZF-AA53-01	Tumor	BLCA	1.78243
TCGA-4Z-AA82-01	Tumor	BLCA	1.92597
TCGA-CF-A5U8-01	Tumor	BLCA	1.07038
TCGA-CF-A8HY-01	Tumor	BLCA	1.93357
TCGA-E7-A8O8-01	Tumor	BLCA	2.03915
TCGA-FD-A3SJ-01	Tumor	BLCA	3.42894
TCGA-GC-A3RC-01	Tumor	BLCA	3.38266
TCGA-GV-A3JX-01	Tumor	BLCA	4.0934
TCGA-K4-A54R-01	Tumor	BLCA	2.37291
TCGA-XF-A9SP-01	Tumor	BLCA	1.68257
TCGA-ZF-A9R5-01	Tumor	BLCA	1.29275
TCGA-CU-A3QU-01	Tumor	BLCA	4.01971
TCGA-DK-A3IU-01	Tumor	BLCA	1.9891
TCGA-FD-A6TA-01	Tumor	BLCA	1.85996
TCGA-ZF-A9R9-01	Tumor	BLCA	1.75275
TCGA-DK-A1AA-01	Tumor	BLCA	1.96716
TCGA-DK-A3WW-01	Tumor	BLCA	2.27201
TCGA-DK-A6B6-01	Tumor	BLCA	2.04961
TCGA-E7-A3Y1-01	Tumor	BLCA	1.33341
TCGA-FD-A5BR-01	Tumor	BLCA	2.10096
TCGA-G2-A2EK-01	Tumor	BLCA	3.28536
TCGA-HQ-A5NE-01	Tumor	BLCA	2.80324
TCGA-YF-AA3M-01	Tumor	BLCA	2.09421
TCGA-BT-A20X-01	Tumor	BLCA	4.95048
TCGA-E7-A4IJ-01	Tumor	BLCA	2.98185
TCGA-FD-A3B8-01	Tumor	BLCA	1.69596
TCGA-K4-AAQO-01	Tumor	BLCA	2.11771
TCGA-LT-A5Z6-01	Tumor	BLCA	2.99636
TCGA-ZF-AA4W-01	Tumor	BLCA	5.61031
TCGA-ZF-AA4X-01	Tumor	BLCA	2.94671
TCGA-4Z-AA7W-01	Tumor	BLCA	1.83994
TCGA-CF-A47Y-01	Tumor	BLCA	1.26902
TCGA-E7-A678-01	Tumor	BLCA	1.13095
TCGA-GV-A3JZ-01	Tumor	BLCA	1.97453
TCGA-BT-A2LA-01	Tumor	BLCA	5.53453
TCGA-CF-A7I0-01	Tumor	BLCA	1.35616
TCGA-FD-A6TE-01	Tumor	BLCA	4.42758
TCGA-GC-A3RB-01	Tumor	BLCA	3.48412
TCGA-GV-A6ZA-01	Tumor	BLCA	1.69596
TCGA-XF-A9T2-01	Tumor	BLCA	1.90692
TCGA-DK-A1A6-01	Tumor	BLCA	1.23264
TCGA-H4-A2HO-01	Tumor	BLCA	1.11767
TCGA-4Z-AA83-01	Tumor	BLCA	1.8914
TCGA-CF-A27C-01	Tumor	BLCA	1.7181
TCGA-CF-A47V-01	Tumor	BLCA	1.38408
TCGA-CF-A9FF-01	Tumor	BLCA	1.76551
TCGA-E7-A8O7-01	Tumor	BLCA	1.76551
TCGA-G2-A3IE-01	Tumor	BLCA	1.20162
TCGA-CF-A9FM-01	Tumor	BLCA	1.29275
TCGA-G2-A2EF-01	Tumor	BLCA	1.44358
TCGA-FJ-A871-01	Tumor	BLCA	3.36459
TCGA-UY-A9PB-01	Tumor	BLCA	2.40326
TCGA-XF-AAMG-01	Tumor	BLCA	3.79181
TCGA-CF-A3MG-01	Tumor	BLCA	3.10435
TCGA-DK-AA6L-01	Tumor	BLCA	5.05133
TCGA-GD-A3OQ-01	Tumor	BLCA	2.14403
TCGA-UY-A9PA-01	Tumor	BLCA	1.85996
TCGA-XF-A9T4-01	Tumor	BLCA	2.87776
TCGA-XF-AAMR-01	Tumor	BLCA	2.55824
TCGA-GV-A3QI-01	Tumor	BLCA	2.06694
TCGA-XF-A8HE-01	Tumor	BLCA	5.31214
TCGA-S5-AA26-01	Tumor	BLCA	2.89332
TCGA-DK-A6B5-01	Tumor	BLCA	3.59334
TCGA-GC-A3I6-01	Tumor	BLCA	3.6218
TCGA-E7-A7DV-01	Tumor	BLCA	2.63689
TCGA-CF-A47W-01	Tumor	BLCA	1.17634
TCGA-CF-A47S-01	Tumor	BLCA	1.48029
TCGA-E7-A6MF-01	Tumor	BLCA	2.98735
TCGA-CF-A3MF-01	Tumor	BLCA	0.584968
TCGA-GC-A6I1-01	Tumor	BLCA	3.8258
TCGA-GC-A6I3-01	Tumor	BLCA	2.11102
TCGA-XF-A9T6-01	Tumor	BLCA	2.98368
TCGA-KQ-A41S-01	Tumor	BLCA	2.54348
TCGA-XF-AAMX-01	Tumor	BLCA	2.38131
TCGA-GD-A76B-01	Tumor	BLCA	2.0356
TCGA-DK-A1AF-01	Tumor	BLCA	1.51603
TCGA-GD-A3OP-01	Tumor	BLCA	2.26907
TCGA-GC-A3RD-01	Tumor	BLCA	2.11102
TCGA-C4-A0F6-01	Tumor	BLCA	2.26907
TCGA-DK-A6AV-01	Tumor	BLCA	1.257
TCGA-BT-A20P-01	Tumor	BLCA	2.55824
TCGA-UY-A78M-01	Tumor	BLCA	2.68261
TCGA-XF-AAMZ-01	Tumor	BLCA	2.0738
TCGA-BL-A5ZZ-01	Tumor	BLCA	2.64151
TCGA-DK-A2HX-01	Tumor	BLCA	3.79181
TCGA-FD-A6TF-01	Tumor	BLCA	3.15706
TCGA-FT-A3EE-01	Tumor	BLCA	4.43025
TCGA-GC-A3WC-01	Tumor	BLCA	2.42764
TCGA-KQ-A41R-01	Tumor	BLCA	3.75278
TCGA-BT-A20R-01	Tumor	BLCA	2.95602
TCGA-DK-A3IL-01	Tumor	BLCA	2.6713
TCGA-FD-A6TC-01	Tumor	BLCA	3.12602
TCGA-XF-AAMW-01	Tumor	BLCA	1.91838
TCGA-ZF-AA56-01	Tumor	BLCA	3.35899
TCGA-BT-A2LD-01	Tumor	BLCA	3.08404
TCGA-DK-A3X1-01	Tumor	BLCA	1.29275
TCGA-E7-A5KE-01	Tumor	BLCA	3.07892
TCGA-PQ-A6FN-01	Tumor	BLCA	4.78138
TCGA-UY-A78P-01	Tumor	BLCA	1.73983
TCGA-XF-A9T5-01	Tumor	BLCA	3.32338
TCGA-YC-A89H-01	Tumor	BLCA	3.64267
TCGA-ZF-A9RE-01	Tumor	BLCA	4.90493
TCGA-FD-A5BZ-01	Tumor	BLCA	2.94862
TCGA-K4-A3WV-01	Tumor	BLCA	3.9588
TCGA-XF-AAN4-01	Tumor	BLCA	0.999979
TCGA-5N-A9KI-01	Tumor	BLCA	4.3847
TCGA-FD-A5BU-01	Tumor	BLCA	1.50078
TCGA-ZF-A9R7-01	Tumor	BLCA	2.58495
TCGA-CF-A1HS-01	Tumor	BLCA	3.66338
TCGA-G2-AA3B-01	Tumor	BLCA	1.76551
TCGA-K4-A6FZ-01	Tumor	BLCA	2.79493
TCGA-UY-A78O-01	Tumor	BLCA	2.97268
TCGA-XF-AAMT-01	Tumor	BLCA	2.54596
TCGA-XF-AAN1-01	Tumor	BLCA	2.24187
TCGA-DK-A1AB-01	Tumor	BLCA	3.729
TCGA-FD-A3B3-01	Tumor	BLCA	2.06694
TCGA-XF-A9SU-01	Tumor	BLCA	1.76975
TCGA-XF-AAN8-01	Tumor	BLCA	1.31616
TCGA-5N-A9KM-01	Tumor	BLCA	2.15054
TCGA-BT-A2LB-01	Tumor	BLCA	2.67805
TCGA-DK-A2I1-01	Tumor	BLCA	1.45944
TCGA-XF-A9SI-01	Tumor	BLCA	1.34485
TCGA-DK-AA6P-01	Tumor	BLCA	2.66902
TCGA-FD-A43S-01	Tumor	BLCA	1.15058
TCGA-BT-A0YX-01	Tumor	BLCA	4.0951
TCGA-BT-A20U-01	Tumor	BLCA	4.15458
TCGA-C4-A0EZ-01	Tumor	BLCA	6.40501
TCGA-LT-A8JT-01	Tumor	BLCA	1.42762
TCGA-XF-A9T3-01	Tumor	BLCA	2.02502
TCGA-ZF-AA51-01	Tumor	BLCA	2.71366
TCGA-UY-A8OD-01	Tumor	BLCA	2.03212
TCGA-2F-A9KW-01	Tumor	BLCA	1.42222
TCGA-DK-A1A7-01	Tumor	BLCA	3.19851
TCGA-DK-A3WX-01	Tumor	BLCA	3.23573
TCGA-DK-A3WY-01	Tumor	BLCA	1.40055
TCGA-K4-A5RI-01	Tumor	BLCA	1.92597
TCGA-ZF-A9RN-01	Tumor	BLCA	2.15705
TCGA-XF-A9SH-01	Tumor	BLCA	1.64614
TCGA-DK-AA6M-01	Tumor	BLCA	1.95608
TCGA-DK-AA76-01	Tumor	BLCA	2.64849
TCGA-H4-A2HQ-01	Tumor	BLCA	2.80118
TCGA-XF-AAME-01	Tumor	BLCA	2.29864
TCGA-DK-A2I2-01	Tumor	BLCA	3.47638
TCGA-FD-A5BY-01	Tumor	BLCA	4.69543
TCGA-XF-A9SX-01	Tumor	BLCA	2.13421
TCGA-ZF-AA5N-01	Tumor	BLCA	2.33053
TCGA-DK-AA6Q-01	Tumor	BLCA	2.56805
TCGA-E5-A2PC-01	Tumor	BLCA	1.97453
TCGA-FD-A5C1-01	Tumor	BLCA	1.62761
TCGA-XF-A8HH-01	Tumor	BLCA	2.2898
TCGA-XF-AAN5-01	Tumor	BLCA	1.08407
TCGA-ZF-AA58-01	Tumor	BLCA	1.41146
TCGA-E7-A97Q-01	Tumor	BLCA	2.19217
TCGA-FD-A62S-01	Tumor	BLCA	2.0738
TCGA-XF-A9SY-01	Tumor	BLCA	2.35052
TCGA-ZF-AA5H-01	Tumor	BLCA	2.6622
TCGA-2F-A9KR-01	Tumor	BLCA	4.71043
TCGA-BT-A20V-01	Tumor	BLCA	2.44362
TCGA-XF-AAMQ-01	Tumor	BLCA	2.80118
TCGA-CF-A47T-01	Tumor	BLCA	1.0072
TCGA-G2-A2EC-01	Tumor	BLCA	1.18905
TCGA-BL-A13I-01	Tumor	BLCA	1.00482
TCGA-XF-A8HI-01	Tumor	BLCA	2.2203
TCGA-G2-A2EJ-01	Tumor	BLCA	4.23495
TCGA-GV-A3QK-01	Tumor	BLCA	1.2869
TCGA-CF-A8HX-01	Tumor	BLCA	2.60172
TCGA-FD-A3B4-01	Tumor	BLCA	3.22653
TCGA-GD-A3OS-01	Tumor	BLCA	4.84349
TCGA-GD-A2C5-01	Tumor	BLCA	2.25395
TCGA-ZF-A9R3-01	Tumor	BLCA	1.6781
TCGA-HQ-A2OF-01	Tumor	BLCA	3.1293
TCGA-XF-A8HB-01	Tumor	BLCA	4.15458
TCGA-FD-A5BV-01	Tumor	BLCA	2.78244
TCGA-YF-AA3L-01	Tumor	BLCA	2.89142
TCGA-FD-A3N6-01	Tumor	BLCA	5.43598
GTEX-1117F-2826-SM-5GZXL	Normal	BRCA	1.69154
GTEX-111YS-1926-SM-5GICC	Normal	BRCA	2.50843
GTEX-117XS-1926-SM-5GICO	Normal	BRCA	0.731174
GTEX-117YX-1426-SM-5H12H	Normal	BRCA	1.12432
GTEX-1192X-2326-SM-5987X	Normal	BRCA	2.07724
GTEX-11DXW-0626-SM-5N9ER	Normal	BRCA	2.41414
GTEX-11DXZ-1926-SM-5GZZL	Normal	BRCA	1.03564
GTEX-11EI6-0626-SM-5985T	Normal	BRCA	2.36461
GTEX-11EM3-1326-SM-5N9C6	Normal	BRCA	2.56805
GTEX-11EQ9-1826-SM-5Q5AJ	Normal	BRCA	1.55087
GTEX-11GS4-2126-SM-5A5KR	Normal	BRCA	3.22957
GTEX-11GSO-1926-SM-5A5K3	Normal	BRCA	1.12432
GTEX-11I78-2226-SM-5PNYA	Normal	BRCA	2.09421
GTEX-11ILO-2226-SM-5A5L1	Normal	BRCA	2.15705
GTEX-11NSD-0926-SM-5N9DR	Normal	BRCA	1.79074
GTEX-11NV4-2026-SM-5N9DG	Normal	BRCA	1.53104
GTEX-11OF3-1926-SM-59889	Normal	BRCA	1.0072
GTEX-11ONC-2126-SM-5HL6E	Normal	BRCA	1.275
GTEX-11P7K-0726-SM-5EGKX	Normal	BRCA	2.92601
GTEX-11P81-1926-SM-5BC53	Normal	BRCA	2.43832
GTEX-11P82-1326-SM-5HL62	Normal	BRCA	1.10434
GTEX-11PRG-0826-SM-5EQ6A	Normal	BRCA	2.36735
GTEX-11TT1-2126-SM-5GU5Y	Normal	BRCA	2.59454
GTEX-11WQC-1726-SM-5GU4W	Normal	BRCA	2.75275
GTEX-11WQK-2426-SM-5GU5C	Normal	BRCA	1.64614
GTEX-1211K-1926-SM-5EQLB	Normal	BRCA	1.94111
GTEX-1269C-2426-SM-5FQSN	Normal	BRCA	3.43965
GTEX-12KS4-0126-SM-5Q5A5	Normal	BRCA	0.226513
GTEX-12WSB-0626-SM-59HJO	Normal	BRCA	1.39509
GTEX-12WSK-2226-SM-5GCO5	Normal	BRCA	2.85403
GTEX-12WSM-1726-SM-5BC6J	Normal	BRCA	1.39509
GTEX-12WSN-1326-SM-5GCNT	Normal	BRCA	1.541
GTEX-12ZZX-1126-SM-5EGKB	Normal	BRCA	3.80322
GTEX-13113-1726-SM-5GCOO	Normal	BRCA	2.27796
GTEX-1313W-0826-SM-5EQ4T	Normal	BRCA	1.541
GTEX-131XW-0726-SM-5EGK3	Normal	BRCA	3.24942
GTEX-131YS-0626-SM-5EGKL	Normal	BRCA	2.92219
GTEX-132AR-0826-SM-5EGK6	Normal	BRCA	1.55087
GTEX-132Q8-1426-SM-5EGK7	Normal	BRCA	2.30454
GTEX-133LE-1726-SM-5K7VQ	Normal	BRCA	3.09083
GTEX-1399U-1826-SM-5PNZ1	Normal	BRCA	2.10433
GTEX-139T6-1626-SM-5PNYZ	Normal	BRCA	0.704867
GTEX-139T8-0826-SM-5L3DE	Normal	BRCA	2.90883
GTEX-139TU-0626-SM-5KM3X	Normal	BRCA	2.35052
GTEX-13CF2-2026-SM-5K7VI	Normal	BRCA	3.02325
GTEX-13CF3-2126-SM-5IFJP	Normal	BRCA	0.956073
GTEX-13D11-1026-SM-5IJFB	Normal	BRCA	2.38681
GTEX-13FHO-0826-SM-5L3E8	Normal	BRCA	2.38681
GTEX-13FTX-1126-SM-5N9EN	Normal	BRCA	0.985488
GTEX-13FTY-2226-SM-5J1ND	Normal	BRCA	3.21564
GTEX-13N11-1726-SM-5J1OJ	Normal	BRCA	3.05312
GTEX-13N1W-0626-SM-5MR4U	Normal	BRCA	0.575314
GTEX-13NZ9-1026-SM-5MR5K	Normal	BRCA	2.47767
GTEX-13NZB-2126-SM-5MR4Y	Normal	BRCA	3.07381
GTEX-13O3O-0826-SM-5K7WE	Normal	BRCA	2.342
GTEX-13O3P-0826-SM-5L3DH	Normal	BRCA	1.80735
GTEX-13O61-1826-SM-5KM4I	Normal	BRCA	0.74845
GTEX-13OW8-0226-SM-5K7UP	Normal	BRCA	1.40055
GTEX-13PL6-2926-SM-5L3I2	Normal	BRCA	2.88165
GTEX-13PVQ-1026-SM-5KM3M	Normal	BRCA	0.464679
GTEX-13QIC-2326-SM-5LU5N	Normal	BRCA	2.71145
GTEX-13S86-1226-SM-5S2OA	Normal	BRCA	1.36178
GTEX-13W3W-1226-SM-5LU4H	Normal	BRCA	2.32772
GTEX-13W46-0826-SM-5LU3H	Normal	BRCA	1.32769
GTEX-144GL-2026-SM-5LU3O	Normal	BRCA	1.33915
GTEX-144GM-0926-SM-5O994	Normal	BRCA	0.432948
GTEX-145ME-1526-SM-5Q5F2	Normal	BRCA	0.941119
GTEX-145MN-1926-SM-5SIAI	Normal	BRCA	1.42762
GTEX-145MO-0826-SM-5NQBL	Normal	BRCA	1.37853
GTEX-146FH-0826-SM-5SI8T	Normal	BRCA	1.73983
GTEX-14753-2426-SM-5LU8U	Normal	BRCA	0.933562
GTEX-147F4-2826-SM-5NQBN	Normal	BRCA	3.01615
GTEX-14ABY-2126-SM-5QGQZ	Normal	BRCA	3.34482
GTEX-14AS3-1626-SM-5S2OY	Normal	BRCA	2.81765
GTEX-14E6E-1326-SM-5S2NR	Normal	BRCA	1.49568
GTEX-Q2AG-0326-SM-48U1O	Normal	BRCA	3.42359
GTEX-QDT8-0626-SM-48TYW	Normal	BRCA	2.85403
GTEX-QEG5-0726-SM-4R1JQ	Normal	BRCA	2.78449
GTEX-QEL4-2126-SM-447AE	Normal	BRCA	2.38681
GTEX-QMRM-1626-SM-4R1KV	Normal	BRCA	1.0566
GTEX-QVJO-1826-SM-447C9	Normal	BRCA	1.55087
GTEX-R53T-1526-SM-48FEK	Normal	BRCA	1.77817
GTEX-R55D-0826-SM-48FEA	Normal	BRCA	0.722454
GTEX-R55F-1726-SM-2TF4R	Normal	BRCA	3.14082
GTEX-REY6-2426-SM-48FF5	Normal	BRCA	1.541
GTEX-RU1J-0626-SM-4WAWY	Normal	BRCA	2.7634
GTEX-RU72-0626-SM-46MUI	Normal	BRCA	3.07381
GTEX-S32W-2026-SM-4AD6E	Normal	BRCA	1.8914
GTEX-S33H-0326-SM-4AD6N	Normal	BRCA	2.07724
GTEX-S341-1526-SM-4AD6K	Normal	BRCA	2.51099
GTEX-S4UY-0726-SM-4AD6X	Normal	BRCA	2.8258
GTEX-S7SE-0826-SM-4AT4D	Normal	BRCA	0.757041
GTEX-SE5C-2126-SM-4BRUJ	Normal	BRCA	2.48802
GTEX-SIU7-1626-SM-4BRUK	Normal	BRCA	2.61117
GTEX-T2YK-2226-SM-32QPT	Normal	BRCA	2.40326
GTEX-T5JW-2026-SM-4DM63	Normal	BRCA	2.31324
GTEX-T6MN-0726-SM-32PML	Normal	BRCA	3.48412
GTEX-T6MO-0326-SM-32QOK	Normal	BRCA	2.46463
GTEX-TML8-1226-SM-32QON	Normal	BRCA	1.86787
GTEX-U3ZH-1426-SM-4DXSR	Normal	BRCA	3.19219
GTEX-U3ZN-1926-SM-4DXSG	Normal	BRCA	2.91646
GTEX-U412-1826-SM-4DXTJ	Normal	BRCA	2.56564
GTEX-U8XE-0826-SM-4E3J1	Normal	BRCA	1.24487
GTEX-UJHI-1426-SM-3DB9C	Normal	BRCA	2.8699
GTEX-UPK5-2326-SM-3P5Z8	Normal	BRCA	2.49312
GTEX-UTHO-1026-SM-3GAF7	Normal	BRCA	1.09761
GTEX-V955-2026-SM-3GAFA	Normal	BRCA	1.32769
GTEX-VJWN-0726-SM-3GIJ8	Normal	BRCA	2.72469
GTEX-VUSG-2226-SM-4KKZO	Normal	BRCA	2.94296
GTEX-WI4N-1426-SM-3LK7H	Normal	BRCA	2.68261
GTEX-WOFL-0826-SM-3MJG1	Normal	BRCA	1.95979
GTEX-WRHU-0326-SM-3MJFY	Normal	BRCA	2.18905
GTEX-WXYG-2226-SM-4E3IM	Normal	BRCA	3.26751
GTEX-WY7C-2726-SM-3NB3P	Normal	BRCA	1.0566
GTEX-WYBS-0926-SM-3NM94	Normal	BRCA	3.23725
GTEX-WYJK-1326-SM-3NB2T	Normal	BRCA	2.72027
GTEX-WYVS-1726-SM-3NMAY	Normal	BRCA	3.24181
GTEX-X15G-1626-SM-3NMB3	Normal	BRCA	2.6848
GTEX-X261-0626-SM-3NMD9	Normal	BRCA	1.77399
GTEX-X4EP-2926-SM-3P5YQ	Normal	BRCA	3.00178
GTEX-X4XY-0926-SM-4E3JD	Normal	BRCA	1.2869
GTEX-XBED-1626-SM-47JYN	Normal	BRCA	2.02857
GTEX-XGQ4-0926-SM-4AT4U	Normal	BRCA	1.45417
GTEX-XMD1-0826-SM-4AT52	Normal	BRCA	1.93734
GTEX-XMD2-0926-SM-4WWEF	Normal	BRCA	2.41414
GTEX-XMK1-1126-SM-4IHJ8	Normal	BRCA	0.823748
GTEX-XQ3S-1326-SM-4BOPQ	Normal	BRCA	1.36735
GTEX-XQ8I-2426-SM-4WAXY	Normal	BRCA	1.78243
GTEX-XUJ4-1926-SM-4BOOV	Normal	BRCA	2.24187
GTEX-XUW1-2326-SM-4BOO5	Normal	BRCA	1.81966
GTEX-XUZC-1626-SM-4BRVP	Normal	BRCA	2.64613
GTEX-XV7Q-2326-SM-4BRVZ	Normal	BRCA	1.78662
GTEX-XYKS-1326-SM-4BRUN	Normal	BRCA	2.42495
GTEX-Y111-2026-SM-4SOJA	Normal	BRCA	2.08748
GTEX-Y114-2026-SM-4TT7L	Normal	BRCA	1.46467
GTEX-Y3I4-1526-SM-4TT7K	Normal	BRCA	1.63228
GTEX-Y3IK-2326-SM-4WWDT	Normal	BRCA	2.5777
GTEX-Y5LM-1726-SM-4VDSX	Normal	BRCA	2.28686
GTEX-Y5V5-2126-SM-4WWFO	Normal	BRCA	2.6713
GTEX-Y5V6-2126-SM-4WWFX	Normal	BRCA	1.32191
GTEX-Y8LW-1626-SM-5IFHX	Normal	BRCA	2.28392
GTEX-Y9LG-1426-SM-5IFJZ	Normal	BRCA	1.20162
GTEX-YB5E-1726-SM-5IFJ3	Normal	BRCA	0.887511
GTEX-YB5K-1626-SM-5IFIN	Normal	BRCA	1.74418
GTEX-YEC3-1026-SM-5IFI5	Normal	BRCA	1.16994
GTEX-YFC4-1426-SM-5IFJG	Normal	BRCA	2.77185
GTEX-YJ8O-2226-SM-5IFHW	Normal	BRCA	1.20162
GTEX-ZA64-1526-SM-5CVMD	Normal	BRCA	1.09085
GTEX-ZAJG-0626-SM-5HL8X	Normal	BRCA	2.48802
GTEX-ZC5H-2626-SM-5J2MG	Normal	BRCA	3.14401
GTEX-ZDTT-2126-SM-5S2OJ	Normal	BRCA	1.2265
GTEX-ZDXO-0126-SM-5S2ND	Normal	BRCA	0.76554
GTEX-ZDYS-1126-SM-5K7UB	Normal	BRCA	1.28094
GTEX-ZEX8-2226-SM-57WC6	Normal	BRCA	2.13097
GTEX-ZF29-1926-SM-5S2P1	Normal	BRCA	2.58012
GTEX-ZF2S-2026-SM-5E461	Normal	BRCA	2.96902
GTEX-ZF3C-2326-SM-5S2MZ	Normal	BRCA	1.81558
GTEX-ZLFU-2126-SM-4WWEV	Normal	BRCA	0.545956
GTEX-ZLV1-1426-SM-4WWES	Normal	BRCA	2.44623
GTEX-ZPIC-1126-SM-5BC7F	Normal	BRCA	1.6781
GTEX-ZQG8-0726-SM-5P9H9	Normal	BRCA	0.83188
GTEX-ZT9W-2026-SM-51MRA	Normal	BRCA	0.575314
GTEX-ZTX8-1226-SM-4YCE9	Normal	BRCA	2.66447
GTEX-ZU9S-1926-SM-5NQBP	Normal	BRCA	3.64847
GTEX-ZUA1-1526-SM-59HLS	Normal	BRCA	1.66451
GTEX-ZV6S-1826-SM-5NQ8D	Normal	BRCA	1.40597
GTEX-ZV7C-1826-SM-5NQ83	Normal	BRCA	2.14403
GTEX-ZVE2-1226-SM-5NQ8R	Normal	BRCA	2.91265
GTEX-ZVT2-1826-SM-5NQ8W	Normal	BRCA	2.77612
GTEX-ZVT4-1026-SM-57WC4	Normal	BRCA	2.00718
GTEX-ZVTK-0326-SM-51MRR	Normal	BRCA	2.59212
GTEX-ZVZQ-0826-SM-51MRF	Normal	BRCA	1.98185
GTEX-ZWKS-2826-SM-5NQ74	Normal	BRCA	1.38958
GTEX-ZXES-0826-SM-5E43C	Normal	BRCA	3.05136
GTEX-ZY6K-1626-SM-5GZWV	Normal	BRCA	3.08915
GTEX-ZYFC-0826-SM-5E44K	Normal	BRCA	1.02146
GTEX-ZYT6-0126-SM-5E45J	Normal	BRCA	1.21411
GTEX-ZYW4-0826-SM-5GIDG	Normal	BRCA	1.12432
GTEX-ZYWO-2326-SM-5GZY4	Normal	BRCA	1.62761
TCGA-BH-A0DD-11	Normal	BRCA	1.42222
TCGA-AC-A23H-11	Normal	BRCA	2.20477
TCGA-BH-A1F8-11	Normal	BRCA	2.82984
TCGA-BH-A18N-11	Normal	BRCA	2.67358
TCGA-BH-A1FG-11	Normal	BRCA	2.38956
TCGA-AC-A2FM-11	Normal	BRCA	3.08236
TCGA-BH-A1EU-11	Normal	BRCA	2.50588
TCGA-BH-A0HK-11	Normal	BRCA	2.44093
TCGA-BH-A1F0-11	Normal	BRCA	2.13754
TCGA-BH-A204-11	Normal	BRCA	1.1635
TCGA-A7-A0CH-11	Normal	BRCA	3.0858
TCGA-A7-A13G-11	Normal	BRCA	0.678058
TCGA-BH-A18S-11	Normal	BRCA	2.91837
TCGA-BH-A0BV-11	Normal	BRCA	3.92505
TCGA-BH-A0DO-11	Normal	BRCA	3.63347
TCGA-BH-A1EN-11	Normal	BRCA	2.45939
TCGA-BH-A1FC-11	Normal	BRCA	2.83999
TCGA-BH-A203-11	Normal	BRCA	2.5261
TCGA-BH-A209-11	Normal	BRCA	3.06694
TCGA-E9-A1ND-11	Normal	BRCA	2.72469
TCGA-BH-A1FR-11	Normal	BRCA	3.22189
TCGA-BH-A18U-11	Normal	BRCA	3.66449
TCGA-BH-A0BW-11	Normal	BRCA	2.96902
TCGA-BH-A0H9-11	Normal	BRCA	1.83994
TCGA-BH-A1EO-11	Normal	BRCA	1.58015
TCGA-BH-A1FD-11	Normal	BRCA	1.97088
TCGA-E9-A1RF-11	Normal	BRCA	0.963466
TCGA-E9-A1RD-11	Normal	BRCA	2.21104
TCGA-BH-A1FJ-11	Normal	BRCA	1.72682
TCGA-E2-A15M-11	Normal	BRCA	2.46726
TCGA-AC-A2FB-11	Normal	BRCA	2.63463
TCGA-BH-A0H7-11	Normal	BRCA	4.52854
TCGA-BH-A0B8-11	Normal	BRCA	1.24487
TCGA-BH-A0DL-11	Normal	BRCA	2.73981
TCGA-E9-A1R7-11	Normal	BRCA	1.73549
TCGA-A7-A0DC-11	Normal	BRCA	2.3477
TCGA-BH-A0DH-11	Normal	BRCA	2.25095
TCGA-E2-A1BC-11	Normal	BRCA	1.12432
TCGA-E9-A1RH-11	Normal	BRCA	1.45944
TCGA-GI-A2C8-11	Normal	BRCA	0.250954
TCGA-A7-A13E-11	Normal	BRCA	1.88359
TCGA-BH-A0AY-11	Normal	BRCA	2.76127
TCGA-BH-A0C0-11	Normal	BRCA	3.78244
TCGA-E9-A1NG-11	Normal	BRCA	1.89528
TCGA-BH-A0BC-11	Normal	BRCA	2.96718
TCGA-BH-A0DP-11	Normal	BRCA	3.20636
TCGA-BH-A18P-11	Normal	BRCA	2.1144
TCGA-BH-A1FB-11	Normal	BRCA	3.57895
TCGA-E9-A1NF-11	Normal	BRCA	1.35616
TCGA-BH-A0BZ-11	Normal	BRCA	2.27502
TCGA-E2-A1LH-11	Normal	BRCA	3.96994
TCGA-E2-A15K-11	Normal	BRCA	2.78663
TCGA-E9-A1N9-11	Normal	BRCA	3.63807
TCGA-E9-A1NA-11	Normal	BRCA	2.63689
TCGA-GI-A2C9-11	Normal	BRCA	2.85998
TCGA-A7-A0CE-11	Normal	BRCA	3.16345
TCGA-A7-A0DB-11	Normal	BRCA	1.33915
TCGA-BH-A0BT-11	Normal	BRCA	3.77187
TCGA-BH-A18J-11	Normal	BRCA	2.67805
TCGA-BH-A18Q-11	Normal	BRCA	3.07037
TCGA-E9-A1RC-11	Normal	BRCA	0.933562
TCGA-BH-A0BS-11	Normal	BRCA	3.7803
TCGA-BH-A1ET-11	Normal	BRCA	3.12434
TCGA-BH-A0BM-11	Normal	BRCA	3.33626
TCGA-BH-A0DV-11	Normal	BRCA	2.82168
TCGA-BH-A0B3-11	Normal	BRCA	3.13914
TCGA-BH-A1F2-11	Normal	BRCA	1.81966
TCGA-BH-A0E1-11	Normal	BRCA	3.62061
TCGA-E9-A1N6-11	Normal	BRCA	3.1457
TCGA-BH-A0BA-11	Normal	BRCA	2.77817
TCGA-BH-A1F6-11	Normal	BRCA	1.80321
TCGA-E2-A153-11	Normal	BRCA	3.87969
TCGA-BH-A18L-11	Normal	BRCA	3.12762
TCGA-BH-A18R-11	Normal	BRCA	3.16514
TCGA-BH-A0DK-11	Normal	BRCA	4.10263
TCGA-BH-A18V-11	Normal	BRCA	3.16994
TCGA-BH-A208-11	Normal	BRCA	3.27504
TCGA-BH-A0AZ-11	Normal	BRCA	3.33914
TCGA-BH-A0C3-11	Normal	BRCA	3.42758
TCGA-BH-A1FH-11	Normal	BRCA	2.19851
TCGA-BH-A18K-11	Normal	BRCA	3.04617
TCGA-E2-A1LS-11	Normal	BRCA	1.546
TCGA-BH-A0AU-11	Normal	BRCA	3.77613
TCGA-BH-A0H5-11	Normal	BRCA	3.37154
TCGA-BH-A1EV-11	Normal	BRCA	2.69596
TCGA-E2-A1IG-11	Normal	BRCA	2.2898
TCGA-E9-A1N5-11	Normal	BRCA	3.9486
TCGA-A7-A13F-11	Normal	BRCA	2.36179
TCGA-BH-A1FM-11	Normal	BRCA	2.58978
TCGA-BH-A1FU-11	Normal	BRCA	3.46073
TCGA-E2-A15I-11	Normal	BRCA	1.7049
TCGA-BH-A0DZ-11	Normal	BRCA	3.41951
TCGA-E2-A158-11	Normal	BRCA	2.83595
TCGA-E9-A1RI-11	Normal	BRCA	1.28094
TCGA-BH-A0B7-11	Normal	BRCA	3.51977
TCGA-BH-A0DQ-11	Normal	BRCA	3.15706
TCGA-BH-A0BJ-11	Normal	BRCA	3.68145
TCGA-BH-A0DT-11	Normal	BRCA	3.40329
TCGA-E2-A1LB-11	Normal	BRCA	4.24262
TCGA-E9-A1N4-11	Normal	BRCA	3.26903
TCGA-AC-A2FF-11	Normal	BRCA	3.54846
TCGA-BH-A0B5-11	Normal	BRCA	0.604087
TCGA-E2-A1L7-11	Normal	BRCA	2.97085
TCGA-E9-A1RB-11	Normal	BRCA	2.47513
TCGA-BH-A0BQ-11	Normal	BRCA	2.85799
TCGA-BH-A18M-11	Normal	BRCA	2.66447
TCGA-BH-A0E0-11	Normal	BRCA	3.3785
TCGA-BH-A1EW-11	Normal	BRCA	3.33914
TCGA-A7-A0D9-11	Normal	BRCA	1.07726
TCGA-BH-A1FN-11	Normal	BRCA	2.1635
TCGA-BH-A0HA-11	Normal	BRCA	3.60169
TCGA-BH-A1FE-11	Normal	BRCA	2.30159
TCGA-BH-A0DG-11	Normal	BRCA	3.13089
TCGA-E2-A15K-06	Tumor	BRCA	4.85653
TCGA-AC-A6IX-06	Tumor	BRCA	2.93166
TCGA-BH-A18V-06	Tumor	BRCA	4.49889
TCGA-E2-A15A-06	Tumor	BRCA	3.66449
TCGA-E2-A15E-06	Tumor	BRCA	4.09425
TCGA-BH-A1ES-06	Tumor	BRCA	5.2604
TCGA-BH-A1FE-06	Tumor	BRCA	2.43832
TCGA-AO-A1KQ-01	Tumor	BRCA	3.95702
TCGA-E2-A14W-01	Tumor	BRCA	5.33915
TCGA-A1-A0SM-01	Tumor	BRCA	3.41416
TCGA-AR-A1AV-01	Tumor	BRCA	5.01924
TCGA-BH-A0B4-01	Tumor	BRCA	3.60169
TCGA-EW-A1PD-01	Tumor	BRCA	2.98735
TCGA-EW-A6SA-01	Tumor	BRCA	2.47513
TCGA-AC-A62V-01	Tumor	BRCA	4.49889
TCGA-BH-A0DD-01	Tumor	BRCA	3.15866
TCGA-AQ-A54O-01	Tumor	BRCA	4.4128
TCGA-D8-A1XS-01	Tumor	BRCA	3.89722
TCGA-A8-A085-01	Tumor	BRCA	2.19538
TCGA-A2-A25D-01	Tumor	BRCA	3.27504
TCGA-AC-A23H-01	Tumor	BRCA	5.11315
TCGA-AC-A3W6-01	Tumor	BRCA	5.62736
TCGA-B6-A0IC-01	Tumor	BRCA	4.21261
TCGA-BH-A1F8-01	Tumor	BRCA	1.9298
TCGA-C8-A26Y-01	Tumor	BRCA	7.19576
TCGA-D8-A1JK-01	Tumor	BRCA	5.16475
TCGA-E2-A9RU-01	Tumor	BRCA	3.34627
TCGA-LL-A6FP-01	Tumor	BRCA	3.94486
TCGA-A8-A08A-01	Tumor	BRCA	5.06045
TCGA-A8-A08L-01	Tumor	BRCA	6.98175
TCGA-E2-A15O-01	Tumor	BRCA	3.3089
TCGA-AN-A0FK-01	Tumor	BRCA	5.0144
TCGA-BH-A18N-01	Tumor	BRCA	2.63228
TCGA-BH-A1FG-01	Tumor	BRCA	3.84998
TCGA-D8-A73U-01	Tumor	BRCA	3.02676
TCGA-LL-A5YM-01	Tumor	BRCA	2.71586
TCGA-AC-A2FM-01	Tumor	BRCA	2.24795
TCGA-AC-A3HN-01	Tumor	BRCA	2.77398
TCGA-BH-A8FY-01	Tumor	BRCA	3.30305
TCGA-D8-A1XG-01	Tumor	BRCA	5.16475
TCGA-A2-A0CO-01	Tumor	BRCA	3.1293
TCGA-A2-A1G1-01	Tumor	BRCA	1.77399
TCGA-A8-A07Z-01	Tumor	BRCA	5.84126
TCGA-D8-A1XC-01	Tumor	BRCA	4.49889
TCGA-E9-A54X-01	Tumor	BRCA	4.69543
TCGA-A7-A56D-01	Tumor	BRCA	4.04356
TCGA-A8-A06Z-01	Tumor	BRCA	4.95145
TCGA-A8-A09I-01	Tumor	BRCA	2.64151
TCGA-A8-A0A1-01	Tumor	BRCA	3.03914
TCGA-AC-A2B8-01	Tumor	BRCA	4.27579
TCGA-AQ-A1H2-01	Tumor	BRCA	4.70485
TCGA-D8-A1XV-01	Tumor	BRCA	3.07381
TCGA-E2-A1LK-01	Tumor	BRCA	6.14077
TCGA-LL-A50Y-01	Tumor	BRCA	5.60081
TCGA-A8-A09Q-01	Tumor	BRCA	4.62406
TCGA-A8-A09Z-01	Tumor	BRCA	3.00537
TCGA-A8-A0AD-01	Tumor	BRCA	3.43293
TCGA-AR-A1AJ-01	Tumor	BRCA	4.1326
TCGA-BH-A1EU-01	Tumor	BRCA	2.76767
TCGA-A2-A0SW-01	Tumor	BRCA	5.73286
TCGA-A8-A09R-01	Tumor	BRCA	4.35548
TCGA-BH-A0H6-01	Tumor	BRCA	4.36737
TCGA-BH-A0WA-01	Tumor	BRCA	5.48348
TCGA-C8-A131-01	Tumor	BRCA	4.74796
TCGA-S3-AA12-01	Tumor	BRCA	1.24487
TCGA-A8-A07E-01	Tumor	BRCA	5.4482
TCGA-A8-A084-01	Tumor	BRCA	7.14224
TCGA-B6-A0IH-01	Tumor	BRCA	3.92794
TCGA-BH-A0HK-01	Tumor	BRCA	2.0531
TCGA-BH-A18G-01	Tumor	BRCA	3.14401
TCGA-D8-A1X5-01	Tumor	BRCA	3.22492
TCGA-D8-A1XZ-01	Tumor	BRCA	3.44755
TCGA-A2-A0EV-01	Tumor	BRCA	2.9542
TCGA-A8-A06U-01	Tumor	BRCA	3.6264
TCGA-A8-A07R-01	Tumor	BRCA	5.00316
TCGA-A8-A081-01	Tumor	BRCA	4.90976
TCGA-A8-A0A9-01	Tumor	BRCA	3.12434
TCGA-AR-A1AP-01	Tumor	BRCA	3.38682
TCGA-BH-A1F0-01	Tumor	BRCA	3.91935
TCGA-BH-A204-01	Tumor	BRCA	2.07724
TCGA-BH-A42U-01	Tumor	BRCA	3.50845
TCGA-C8-A12K-01	Tumor	BRCA	2.02148
TCGA-D8-A145-01	Tumor	BRCA	4.30597
TCGA-D8-A1JN-01	Tumor	BRCA	5.59219
TCGA-D8-A1X6-01	Tumor	BRCA	3.36594
TCGA-D8-A1Y1-01	Tumor	BRCA	5.33554
TCGA-E2-A1IH-01	Tumor	BRCA	3.52735
TCGA-EW-A1IW-01	Tumor	BRCA	3.40601
TCGA-OL-A66J-01	Tumor	BRCA	2.19538
TCGA-A2-A0EU-01	Tumor	BRCA	2.94862
TCGA-A7-A0CH-01	Tumor	BRCA	5.55577
TCGA-A7-A13G-01	Tumor	BRCA	4.14552
TCGA-A7-A3RF-01	Tumor	BRCA	3.90973
TCGA-A8-A09G-01	Tumor	BRCA	5.45347
TCGA-AC-A2FG-01	Tumor	BRCA	4.73718
TCGA-AC-A3EH-01	Tumor	BRCA	6.3644
TCGA-AC-A3QP-01	Tumor	BRCA	3.46337
TCGA-AC-A62Y-01	Tumor	BRCA	3.55825
TCGA-AN-A0AJ-01	Tumor	BRCA	4.56013
TCGA-BH-A0E7-01	Tumor	BRCA	4.23495
TCGA-BH-A18S-01	Tumor	BRCA	5.58857
TCGA-BH-A1EY-01	Tumor	BRCA	5.22769
TCGA-D8-A1JF-01	Tumor	BRCA	4.49125
TCGA-D8-A73W-01	Tumor	BRCA	3.12097
TCGA-E2-A105-01	Tumor	BRCA	3.86991
TCGA-E2-A14P-01	Tumor	BRCA	6.36213
TCGA-LD-A74U-01	Tumor	BRCA	5.01973
TCGA-A7-A0CG-01	Tumor	BRCA	5.49247
TCGA-AC-A2BK-01	Tumor	BRCA	2.93922
TCGA-AO-A1KT-01	Tumor	BRCA	2.48539
TCGA-BH-A0BV-01	Tumor	BRCA	2.99636
TCGA-BH-A0DO-01	Tumor	BRCA	4.38746
TCGA-BH-A0HI-01	Tumor	BRCA	4.80481
TCGA-BH-A1EN-01	Tumor	BRCA	4.06781
TCGA-BH-A1FC-01	Tumor	BRCA	4.37432
TCGA-BH-A203-01	Tumor	BRCA	6.02057
TCGA-C8-A12Q-01	Tumor	BRCA	5.38921
TCGA-E2-A1IL-01	Tumor	BRCA	4.82786
TCGA-E2-A2P5-01	Tumor	BRCA	6.06174
TCGA-E9-A3Q9-01	Tumor	BRCA	2.11102
TCGA-A2-A4S0-01	Tumor	BRCA	3.03738
TCGA-A8-A06X-01	Tumor	BRCA	4.56923
TCGA-AO-A1KP-01	Tumor	BRCA	3.6005
TCGA-BH-A0HF-01	Tumor	BRCA	3.07381
TCGA-BH-A0W5-01	Tumor	BRCA	3.8728
TCGA-BH-A209-01	Tumor	BRCA	3.41688
TCGA-D8-A1J8-01	Tumor	BRCA	3.74954
TCGA-D8-A1JS-01	Tumor	BRCA	4.41747
TCGA-E2-A2P6-01	Tumor	BRCA	3.60995
TCGA-EW-A1P5-01	Tumor	BRCA	3.18587
TCGA-LL-A6FQ-01	Tumor	BRCA	4.29723
TCGA-WT-AB44-01	Tumor	BRCA	5.79205
TCGA-A2-A0D1-01	Tumor	BRCA	4.35548
TCGA-A8-A07W-01	Tumor	BRCA	4.20551
TCGA-A8-A08Z-01	Tumor	BRCA	3.50207
TCGA-A8-A099-01	Tumor	BRCA	4.10517
TCGA-AC-A23G-01	Tumor	BRCA	3.51977
TCGA-AC-A2QI-01	Tumor	BRCA	5.87359
TCGA-AC-A5EH-01	Tumor	BRCA	6.00836
TCGA-AN-A0AK-01	Tumor	BRCA	5.41274
TCGA-B6-A40B-01	Tumor	BRCA	4.63232
TCGA-BH-A0BP-01	Tumor	BRCA	2.96902
TCGA-D8-A1XJ-01	Tumor	BRCA	3.99008
TCGA-E2-A14O-01	Tumor	BRCA	5.46266
TCGA-E2-A15G-01	Tumor	BRCA	4.85295
TCGA-A8-A06T-01	Tumor	BRCA	3.77817
TCGA-A8-A094-01	Tumor	BRCA	2.77185
TCGA-A8-A09M-01	Tumor	BRCA	2.23879
TCGA-AC-A3TN-01	Tumor	BRCA	4.03295
TCGA-AC-A8OR-01	Tumor	BRCA	2.73335
TCGA-AO-A12G-01	Tumor	BRCA	4.67073
TCGA-B6-A0IM-01	Tumor	BRCA	3.19691
TCGA-BH-A42T-01	Tumor	BRCA	2.98368
TCGA-D8-A27G-01	Tumor	BRCA	3.76445
TCGA-E9-A1ND-01	Tumor	BRCA	4.24338
TCGA-EW-A423-01	Tumor	BRCA	3.56805
TCGA-OL-A66P-01	Tumor	BRCA	4.63692
TCGA-V7-A7HQ-01	Tumor	BRCA	4.38194
TCGA-A2-A1FV-01	Tumor	BRCA	0.948623
TCGA-A8-A090-01	Tumor	BRCA	4.09764
TCGA-AC-A3YI-01	Tumor	BRCA	3.49186
TCGA-AC-A5XS-01	Tumor	BRCA	3.30593
TCGA-AC-A5XU-01	Tumor	BRCA	2.72027
TCGA-AN-A03X-01	Tumor	BRCA	3.80322
TCGA-B6-A0IP-01	Tumor	BRCA	4.15458
TCGA-C8-A1HM-01	Tumor	BRCA	2.79288
TCGA-D8-A142-01	Tumor	BRCA	4.77184
TCGA-D8-A1XY-01	Tumor	BRCA	4.79073
TCGA-E2-A14U-01	Tumor	BRCA	4.38127
TCGA-E2-A1B4-01	Tumor	BRCA	3.92411
TCGA-E2-A1IF-01	Tumor	BRCA	5.90043
TCGA-E9-A1RE-01	Tumor	BRCA	2.75914
TCGA-E9-A22A-01	Tumor	BRCA	3.6264
TCGA-OL-A66H-01	Tumor	BRCA	2.08403
TCGA-A2-A0CS-01	Tumor	BRCA	5.64813
TCGA-A2-A0CU-01	Tumor	BRCA	2.64151
TCGA-A2-A0EM-01	Tumor	BRCA	4.90783
TCGA-A8-A07S-01	Tumor	BRCA	5.74473
TCGA-A8-A096-01	Tumor	BRCA	2.43832
TCGA-A8-A09E-01	Tumor	BRCA	3.18907
TCGA-A8-A0A4-01	Tumor	BRCA	1.99637
TCGA-AC-A6IW-01	Tumor	BRCA	3.92598
TCGA-AR-A0U0-01	Tumor	BRCA	5.12141
TCGA-B6-A0I1-01	Tumor	BRCA	5.01081
TCGA-B6-A0RP-01	Tumor	BRCA	4.35967
TCGA-BH-A0BG-01	Tumor	BRCA	3.49441
TCGA-BH-A1FR-01	Tumor	BRCA	3.86786
TCGA-D8-A1JP-01	Tumor	BRCA	4.33846
TCGA-E2-A1LL-01	Tumor	BRCA	2.77398
TCGA-LD-A9QF-01	Tumor	BRCA	3.97087
TCGA-LQ-A4E4-01	Tumor	BRCA	2.33911
TCGA-UL-AAZ6-01	Tumor	BRCA	3.57528
TCGA-A7-A26H-01	Tumor	BRCA	4.87381
TCGA-AC-A62X-01	Tumor	BRCA	5.4479
TCGA-AC-A8OP-01	Tumor	BRCA	2.4195
TCGA-AC-A8OQ-01	Tumor	BRCA	4.15383
TCGA-AO-A125-01	Tumor	BRCA	5.69597
TCGA-BH-A0EA-01	Tumor	BRCA	4.42624
TCGA-BH-A18U-01	Tumor	BRCA	4.60114
TCGA-D8-A1JL-01	Tumor	BRCA	3.16026
TCGA-D8-A27H-01	Tumor	BRCA	4.47768
TCGA-E2-A572-01	Tumor	BRCA	2.63924
TCGA-E9-A2JS-01	Tumor	BRCA	3.61702
TCGA-GM-A3NY-01	Tumor	BRCA	3.90208
TCGA-OL-A66K-01	Tumor	BRCA	3.53109
TCGA-PE-A5DC-01	Tumor	BRCA	3.20948
TCGA-A2-A0CT-01	Tumor	BRCA	2.79699
TCGA-A2-A1G4-01	Tumor	BRCA	1.17634
TCGA-A7-A3IY-01	Tumor	BRCA	1.92597
TCGA-A8-A08S-01	Tumor	BRCA	3.70267
TCGA-AC-A8OS-01	Tumor	BRCA	4.0461
TCGA-AN-A0FD-01	Tumor	BRCA	3.39641
TCGA-AO-A0J7-01	Tumor	BRCA	3.40193
TCGA-B6-A0RO-01	Tumor	BRCA	3.0635
TCGA-BH-A0BW-01	Tumor	BRCA	3.60885
TCGA-BH-A0DS-01	Tumor	BRCA	4.75277
TCGA-D8-A1Y2-01	Tumor	BRCA	3.20475
TCGA-E2-A1IK-01	Tumor	BRCA	3.02676
TCGA-E2-A1LE-01	Tumor	BRCA	4.50845
TCGA-E9-A1NH-01	Tumor	BRCA	5.87212
TCGA-E9-A22B-01	Tumor	BRCA	3.02325
TCGA-E9-A295-01	Tumor	BRCA	4.17952
TCGA-OL-A5D6-01	Tumor	BRCA	6.46956
TCGA-OL-A66L-01	Tumor	BRCA	3.09763
TCGA-S3-A6ZG-01	Tumor	BRCA	3.95234
TCGA-A1-A0SB-01	Tumor	BRCA	4.93732
TCGA-A2-A0EN-01	Tumor	BRCA	2.38681
TCGA-A2-A259-01	Tumor	BRCA	3.41688
TCGA-A7-A425-01	Tumor	BRCA	5.42192
TCGA-A8-A08P-01	Tumor	BRCA	3.79283
TCGA-A8-A09W-01	Tumor	BRCA	4.11271
TCGA-AN-A0AS-01	Tumor	BRCA	2.54348
TCGA-AQ-A0Y5-01	Tumor	BRCA	4.57047
TCGA-AR-A1AK-01	Tumor	BRCA	3.1473
TCGA-AR-A2LL-01	Tumor	BRCA	3.71043
TCGA-BH-A18T-01	Tumor	BRCA	3.32914
TCGA-C8-A12M-01	Tumor	BRCA	1.68257
TCGA-D8-A1JT-01	Tumor	BRCA	2.50077
TCGA-E9-A1N3-01	Tumor	BRCA	4.26754
TCGA-E9-A1R3-01	Tumor	BRCA	4.88946
TCGA-EW-A1J6-01	Tumor	BRCA	2.24795
TCGA-EW-A1PB-01	Tumor	BRCA	3.15058
TCGA-LL-A7T0-01	Tumor	BRCA	3.53603
TCGA-OL-A5D7-01	Tumor	BRCA	4.69706
TCGA-A8-A06R-01	Tumor	BRCA	6.10499
TCGA-A8-A079-01	Tumor	BRCA	3.45019
TCGA-A8-A07B-01	Tumor	BRCA	3.14401
TCGA-A8-A07I-01	Tumor	BRCA	4.22803
TCGA-A8-A09C-01	Tumor	BRCA	3.53228
TCGA-AN-A0XP-01	Tumor	BRCA	4.83539
TCGA-AO-A03O-01	Tumor	BRCA	3.33626
TCGA-AO-A12H-01	Tumor	BRCA	2.53354
TCGA-AO-A1KS-01	Tumor	BRCA	3.49952
TCGA-AR-A2LE-01	Tumor	BRCA	2.44623
TCGA-BH-A0E6-01	Tumor	BRCA	6.06371
TCGA-BH-A0EB-01	Tumor	BRCA	4.42024
TCGA-BH-A0H0-01	Tumor	BRCA	2.4803
TCGA-BH-A0H9-01	Tumor	BRCA	3.59811
TCGA-BH-A1FL-01	Tumor	BRCA	4.71428
TCGA-D8-A1XQ-01	Tumor	BRCA	3.73881
TCGA-E2-A56Z-01	Tumor	BRCA	2.74202
TCGA-E2-A576-01	Tumor	BRCA	3.44228
TCGA-E9-A24A-01	Tumor	BRCA	3.18747
TCGA-GM-A2D9-01	Tumor	BRCA	3.82069
TCGA-LL-A9Q3-01	Tumor	BRCA	6.04549
TCGA-A7-A6VX-01	Tumor	BRCA	4.95232
TCGA-A8-A07P-01	Tumor	BRCA	3.02325
TCGA-A8-A09K-01	Tumor	BRCA	4.38613
TCGA-A8-A09T-01	Tumor	BRCA	3.93832
TCGA-AC-A3OD-01	Tumor	BRCA	1.08408
TCGA-AN-A046-01	Tumor	BRCA	5.52798
TCGA-AN-A0XN-01	Tumor	BRCA	3.53356
TCGA-AO-A0JF-01	Tumor	BRCA	4.96258
TCGA-AR-A0TR-01	Tumor	BRCA	3.7463
TCGA-AR-A5QN-01	Tumor	BRCA	3.21564
TCGA-AR-A5QQ-01	Tumor	BRCA	3.27199
TCGA-B6-A0RQ-01	Tumor	BRCA	4.30303
TCGA-B6-A1KF-01	Tumor	BRCA	6.07258
TCGA-BH-A0EE-01	Tumor	BRCA	3.49696
TCGA-BH-A1EO-01	Tumor	BRCA	2.48802
TCGA-BH-A1FD-01	Tumor	BRCA	4.05483
TCGA-C8-A3M8-01	Tumor	BRCA	2.89332
TCGA-D8-A4Z1-01	Tumor	BRCA	4.19294
TCGA-E2-A154-01	Tumor	BRCA	4.87777
TCGA-E9-A1RF-01	Tumor	BRCA	3.14242
TCGA-EW-A1P1-01	Tumor	BRCA	3.59573
TCGA-XX-A89A-01	Tumor	BRCA	2.87776
TCGA-A1-A0SO-01	Tumor	BRCA	2.66675
TCGA-A2-A0CW-01	Tumor	BRCA	6.22223
TCGA-A2-A0YF-01	Tumor	BRCA	3.37434
TCGA-A2-A0YM-01	Tumor	BRCA	2.91265
TCGA-A2-A4RX-01	Tumor	BRCA	4.8186
TCGA-A8-A083-01	Tumor	BRCA	4.09171
TCGA-AN-A0FW-01	Tumor	BRCA	4.28831
TCGA-AN-A0XV-01	Tumor	BRCA	4.48475
TCGA-AO-A0J3-01	Tumor	BRCA	4.08917
TCGA-B6-A0WV-01	Tumor	BRCA	4.63462
TCGA-B6-A1KC-01	Tumor	BRCA	1.0566
TCGA-BH-A0GY-01	Tumor	BRCA	4.5097
TCGA-BH-A0HN-01	Tumor	BRCA	5.60345
TCGA-BH-A1EX-01	Tumor	BRCA	4.06696
TCGA-C8-A12L-01	Tumor	BRCA	5.18351
TCGA-E2-A10B-01	Tumor	BRCA	5.38267
TCGA-E9-A1RD-01	Tumor	BRCA	3.99907
TCGA-GM-A4E0-01	Tumor	BRCA	2.0356
TCGA-LL-A73Y-01	Tumor	BRCA	5.94715
TCGA-OL-A97C-01	Tumor	BRCA	4.78717
TCGA-S3-AA11-01	Tumor	BRCA	5.15824
TCGA-A2-A04N-01	Tumor	BRCA	4.52921
TCGA-A2-A0SU-01	Tumor	BRCA	3.49186
TCGA-A2-A0T2-01	Tumor	BRCA	4.80577
TCGA-A2-A25F-01	Tumor	BRCA	1.59932
TCGA-A2-A4S1-01	Tumor	BRCA	2.17633
TCGA-A7-A0CD-01	Tumor	BRCA	2.49822
TCGA-A8-A06N-01	Tumor	BRCA	1.70046
TCGA-A8-A06Y-01	Tumor	BRCA	2.96902
TCGA-A8-A076-01	Tumor	BRCA	5.38677
TCGA-A8-A07U-01	Tumor	BRCA	3.45546
TCGA-A8-A08H-01	Tumor	BRCA	1.76551
TCGA-A8-A0A2-01	Tumor	BRCA	1.82785
TCGA-AC-A3W7-01	Tumor	BRCA	5.09888
TCGA-AC-A3YJ-01	Tumor	BRCA	2.9891
TCGA-AN-A03Y-01	Tumor	BRCA	2.0356
TCGA-AR-A0TV-01	Tumor	BRCA	2.9891
TCGA-B6-A0IO-01	Tumor	BRCA	3.29281
TCGA-BH-A0B1-01	Tumor	BRCA	3.29425
TCGA-BH-A1FJ-01	Tumor	BRCA	3.70267
TCGA-D8-A1X9-01	Tumor	BRCA	1.56071
TCGA-D8-A27E-01	Tumor	BRCA	3.35195
TCGA-E2-A15M-01	Tumor	BRCA	3.42495
TCGA-E9-A1R4-01	Tumor	BRCA	3.74519
TCGA-EW-A1PC-01	Tumor	BRCA	4.89236
TCGA-OL-A5S0-01	Tumor	BRCA	4.08747
TCGA-W8-A86G-01	Tumor	BRCA	3.9458
TCGA-A7-A26I-01	Tumor	BRCA	1.99205
TCGA-A8-A07F-01	Tumor	BRCA	5.66764
TCGA-A8-A07G-01	Tumor	BRCA	4.57287
TCGA-A8-A08C-01	Tumor	BRCA	6.40866
TCGA-A8-A097-01	Tumor	BRCA	3.27504
TCGA-AC-A2FB-01	Tumor	BRCA	3.57656
TCGA-AC-A2FO-01	Tumor	BRCA	2.46988
TCGA-AC-A3W5-01	Tumor	BRCA	4.846
TCGA-AR-A1AW-01	Tumor	BRCA	1.40055
TCGA-AR-A1AY-01	Tumor	BRCA	4.7186
TCGA-AR-A24H-01	Tumor	BRCA	3.22653
TCGA-AR-A2LN-01	Tumor	BRCA	3.82273
TCGA-BH-A0H7-01	Tumor	BRCA	5.84323
TCGA-BH-A0HP-01	Tumor	BRCA	5.06268
TCGA-C8-A133-01	Tumor	BRCA	2.88753
TCGA-D8-A1Y0-01	Tumor	BRCA	2.31324
TCGA-E2-A14S-01	Tumor	BRCA	2.57046
TCGA-E2-A15L-01	Tumor	BRCA	4.21024
TCGA-E2-A15T-01	Tumor	BRCA	3.32626
TCGA-E9-A5FL-01	Tumor	BRCA	3.53977
TCGA-GM-A5PX-01	Tumor	BRCA	4.20239
TCGA-S3-AA10-01	Tumor	BRCA	4.10687
TCGA-A2-A0EQ-01	Tumor	BRCA	4.14241
TCGA-A8-A08T-01	Tumor	BRCA	4.56319
TCGA-A8-A0A6-01	Tumor	BRCA	2.44623
TCGA-AO-A0JC-01	Tumor	BRCA	1.41146
TCGA-AR-A0TX-01	Tumor	BRCA	6.05396
TCGA-AR-A1AX-01	Tumor	BRCA	4.90009
TCGA-B6-A0IB-01	Tumor	BRCA	4.4944
TCGA-BH-A0B8-01	Tumor	BRCA	3.00721
TCGA-BH-A0DL-01	Tumor	BRCA	6.39266
TCGA-BH-A201-01	Tumor	BRCA	2.43562
TCGA-C8-A135-01	Tumor	BRCA	6.40689
TCGA-D8-A1XA-01	Tumor	BRCA	3.92122
TCGA-D8-A27P-01	Tumor	BRCA	5.20871
TCGA-E2-A109-01	Tumor	BRCA	3.16674
TCGA-E2-A10E-01	Tumor	BRCA	2.71586
TCGA-E2-A14Z-01	Tumor	BRCA	4.6375
TCGA-E2-A15F-01	Tumor	BRCA	2.69824
TCGA-E2-A15R-01	Tumor	BRCA	4.50712
TCGA-E9-A1R7-01	Tumor	BRCA	3.31618
TCGA-EW-A1P6-01	Tumor	BRCA	3.92505
TCGA-LL-A5YL-01	Tumor	BRCA	2.46988
TCGA-PE-A5DD-01	Tumor	BRCA	3.81149
TCGA-S3-A6ZF-01	Tumor	BRCA	4.06612
TCGA-S3-AA17-01	Tumor	BRCA	2.8258
TCGA-5L-AAT1-01	Tumor	BRCA	3.59692
TCGA-A2-A0CY-01	Tumor	BRCA	3.42631
TCGA-A2-A0ER-01	Tumor	BRCA	1.80321
TCGA-A2-A0SV-01	Tumor	BRCA	3.4128
TCGA-A2-A0YD-01	Tumor	BRCA	3.92505
TCGA-A2-A0YG-01	Tumor	BRCA	7.01221
TCGA-A2-A1FZ-01	Tumor	BRCA	4.38337
TCGA-A7-A0DC-01	Tumor	BRCA	2.18272
TCGA-A7-A3J1-01	Tumor	BRCA	3.58133
TCGA-A8-A06P-01	Tumor	BRCA	3.43965
TCGA-A8-A06Q-01	Tumor	BRCA	3.10099
TCGA-AC-A4ZE-01	Tumor	BRCA	2.65993
TCGA-AN-A0FT-01	Tumor	BRCA	6.85847
TCGA-AN-A0XS-01	Tumor	BRCA	4.34626
TCGA-AO-A12B-01	Tumor	BRCA	5.09888
TCGA-B6-A0IK-01	Tumor	BRCA	5.72952
TCGA-B6-A1KI-01	Tumor	BRCA	3.79496
TCGA-BH-A0DH-01	Tumor	BRCA	2.58978
TCGA-BH-A0DI-01	Tumor	BRCA	4.80327
TCGA-BH-A18H-01	Tumor	BRCA	3.98914
TCGA-BH-A5J0-01	Tumor	BRCA	5.14609
TCGA-C8-A274-01	Tumor	BRCA	4.29429
TCGA-E2-A1AZ-01	Tumor	BRCA	2.81765
TCGA-E2-A1BC-01	Tumor	BRCA	5.50304
TCGA-E9-A1R5-01	Tumor	BRCA	4.32116
TCGA-E9-A1R6-01	Tumor	BRCA	3.16514
TCGA-E9-A1RH-01	Tumor	BRCA	4.73333
TCGA-E9-A2JT-01	Tumor	BRCA	4.11441
TCGA-E9-A54Y-01	Tumor	BRCA	3.72355
TCGA-E9-A5UP-01	Tumor	BRCA	4.62003
TCGA-EW-A1OY-01	Tumor	BRCA	3.71699
TCGA-GI-A2C8-01	Tumor	BRCA	3.41416
TCGA-GM-A3NW-01	Tumor	BRCA	1.60409
TCGA-GM-A5PV-01	Tumor	BRCA	4.08917
TCGA-OL-A5RU-01	Tumor	BRCA	5.85325
TCGA-S3-AA0Z-01	Tumor	BRCA	5.95906
TCGA-UU-A93S-01	Tumor	BRCA	5.0687
TCGA-3C-AALJ-01	Tumor	BRCA	5.49375
TCGA-A2-A04T-01	Tumor	BRCA	5.4185
TCGA-A2-A0CQ-01	Tumor	BRCA	4.06781
TCGA-A2-A0EY-01	Tumor	BRCA	6.29517
TCGA-A2-A0ST-01	Tumor	BRCA	2.68261
TCGA-A2-A0SY-01	Tumor	BRCA	2.54099
TCGA-A2-A0T4-01	Tumor	BRCA	2.6848
TCGA-A2-A0YI-01	Tumor	BRCA	2.53106
TCGA-A2-A1FW-01	Tumor	BRCA	3.17154
TCGA-A2-A3XS-01	Tumor	BRCA	5.18546
TCGA-A2-A4S2-01	Tumor	BRCA	3.54846
TCGA-A7-A0DA-01	Tumor	BRCA	5.48055
TCGA-A7-A3IZ-01	Tumor	BRCA	1.73549
TCGA-A7-A3J0-01	Tumor	BRCA	2.77817
TCGA-A7-A4SC-01	Tumor	BRCA	2.94671
TCGA-A7-A5ZV-01	Tumor	BRCA	5.96781
TCGA-A8-A09X-01	Tumor	BRCA	4.58618
TCGA-AC-A23C-01	Tumor	BRCA	4.41547
TCGA-AC-A2FE-01	Tumor	BRCA	2.83595
TCGA-AN-A049-01	Tumor	BRCA	2.69156
TCGA-AN-A0AT-01	Tumor	BRCA	3.71366
TCGA-AN-A0FL-01	Tumor	BRCA	6.10726
TCGA-AR-A1AT-01	Tumor	BRCA	3.12266
TCGA-AR-A255-01	Tumor	BRCA	3.13754
TCGA-AR-A2LK-01	Tumor	BRCA	3.70489
TCGA-AR-A5QM-01	Tumor	BRCA	5.16912
TCGA-B6-A0I9-01	Tumor	BRCA	2.7634
TCGA-B6-A0X4-01	Tumor	BRCA	5.89679
TCGA-B6-A0X7-01	Tumor	BRCA	3.78661
TCGA-B6-A2IU-01	Tumor	BRCA	3.61115
TCGA-BH-A0C0-01	Tumor	BRCA	4.7677
TCGA-BH-A0DE-01	Tumor	BRCA	3.3533
TCGA-BH-A0DX-01	Tumor	BRCA	6.3486
TCGA-BH-A0GZ-01	Tumor	BRCA	3.00896
TCGA-BH-A0HW-01	Tumor	BRCA	2.56314
TCGA-BH-A1F5-01	Tumor	BRCA	3.63108
TCGA-C8-A12X-01	Tumor	BRCA	2.61117
TCGA-D8-A140-01	Tumor	BRCA	3.15706
TCGA-D8-A1JE-01	Tumor	BRCA	2.68928
TCGA-D8-A1JG-01	Tumor	BRCA	4.47959
TCGA-D8-A1X8-01	Tumor	BRCA	2.56314
TCGA-D8-A1XB-01	Tumor	BRCA	4.8104
TCGA-D8-A27V-01	Tumor	BRCA	4.36176
TCGA-E2-A14R-01	Tumor	BRCA	5.26829
TCGA-E9-A1NG-01	Tumor	BRCA	4.65997
TCGA-E9-A1RG-01	Tumor	BRCA	5.4269
TCGA-EW-A6SB-01	Tumor	BRCA	1.93734
TCGA-GM-A2DB-01	Tumor	BRCA	4.2555
TCGA-LL-A441-01	Tumor	BRCA	3.93542
TCGA-A1-A0SG-01	Tumor	BRCA	5.11811
TCGA-A2-A0YK-01	Tumor	BRCA	4.95329
TCGA-A2-A1FX-01	Tumor	BRCA	3.26303
TCGA-A7-A13H-01	Tumor	BRCA	3.92981
TCGA-A8-A091-01	Tumor	BRCA	3.14889
TCGA-A8-A093-01	Tumor	BRCA	4.63049
TCGA-AN-A0FN-01	Tumor	BRCA	3.25551
TCGA-AN-A0XL-01	Tumor	BRCA	2.5185
TCGA-AO-A0J6-01	Tumor	BRCA	3.95234
TCGA-AO-A0J8-01	Tumor	BRCA	5.05958
TCGA-AO-A0J9-01	Tumor	BRCA	2.25095
TCGA-AO-A128-01	Tumor	BRCA	2.43562
TCGA-AQ-A04H-01	Tumor	BRCA	3.5838
TCGA-AR-A24S-01	Tumor	BRCA	3.22957
TCGA-B6-A0RE-01	Tumor	BRCA	4.83085
TCGA-B6-A0WT-01	Tumor	BRCA	2.81559
TCGA-B6-A0X5-01	Tumor	BRCA	2.22344
TCGA-BH-A0C1-01	Tumor	BRCA	5.33525
TCGA-BH-A6R9-01	Tumor	BRCA	1.70046
TCGA-C8-A278-01	Tumor	BRCA	5.69823
TCGA-D8-A1XT-01	Tumor	BRCA	5.02457
TCGA-D8-A1Y3-01	Tumor	BRCA	4.70648
TCGA-E2-A156-01	Tumor	BRCA	4.91556
TCGA-E2-A15C-01	Tumor	BRCA	4.11855
TCGA-E2-A15P-01	Tumor	BRCA	4.49574
TCGA-E2-A1IE-01	Tumor	BRCA	2.67586
TCGA-E9-A1NC-01	Tumor	BRCA	5.02506
TCGA-E9-A1QZ-01	Tumor	BRCA	3.22189
TCGA-EW-A1J3-01	Tumor	BRCA	3.64727
TCGA-EW-A3U0-01	Tumor	BRCA	2.12102
TCGA-LL-A440-01	Tumor	BRCA	2.48284
TCGA-LL-A740-01	Tumor	BRCA	5.37642
TCGA-LL-A8F5-01	Tumor	BRCA	3.92318
TCGA-OL-A5DA-01	Tumor	BRCA	4.07129
TCGA-Z7-A8R5-01	Tumor	BRCA	3.52105
TCGA-A2-A0CK-01	Tumor	BRCA	3.04617
TCGA-A2-A0CP-01	Tumor	BRCA	4.33057
TCGA-A2-A0D0-01	Tumor	BRCA	3.25551
TCGA-A8-A06O-01	Tumor	BRCA	3.60995
TCGA-AR-A1AL-01	Tumor	BRCA	3.85994
TCGA-B6-A0RL-01	Tumor	BRCA	3.37299
TCGA-B6-A0RN-01	Tumor	BRCA	4.25626
TCGA-BH-A0BC-01	Tumor	BRCA	3.91365
TCGA-BH-A0DP-01	Tumor	BRCA	3.8074
TCGA-BH-A0HY-01	Tumor	BRCA	4.20551
TCGA-BH-A18P-01	Tumor	BRCA	2.08067
TCGA-BH-A1FB-01	Tumor	BRCA	3.39641
TCGA-BH-A202-01	Tumor	BRCA	4.28471
TCGA-C8-A3M7-01	Tumor	BRCA	4.62349
TCGA-D8-A1JA-01	Tumor	BRCA	3.51603
TCGA-E2-A1IN-01	Tumor	BRCA	4.58973
TCGA-E2-A1IU-01	Tumor	BRCA	3.81864
TCGA-E9-A1NF-01	Tumor	BRCA	5.55371
TCGA-E9-A5FK-01	Tumor	BRCA	4.23116
TCGA-EW-A3E8-01	Tumor	BRCA	3.25398
TCGA-EW-A6SC-01	Tumor	BRCA	3.67804
TCGA-A1-A0SD-01	Tumor	BRCA	3.93542
TCGA-A2-A0T0-01	Tumor	BRCA	5.69264
TCGA-A2-A0YC-01	Tumor	BRCA	4.94206
TCGA-A2-A4S3-01	Tumor	BRCA	4.23646
TCGA-A8-A086-01	Tumor	BRCA	3.39098
TCGA-A8-A08F-01	Tumor	BRCA	3.04793
TCGA-AN-A0FJ-01	Tumor	BRCA	3.25246
TCGA-AN-A0XO-01	Tumor	BRCA	5.56223
TCGA-AO-A03N-01	Tumor	BRCA	6.24227
TCGA-AO-A0JD-01	Tumor	BRCA	3.53484
TCGA-AO-A0JL-01	Tumor	BRCA	5.16669
TCGA-AR-A0U3-01	Tumor	BRCA	5.0206
TCGA-AR-A2LQ-01	Tumor	BRCA	5.13958
TCGA-BH-A0BR-01	Tumor	BRCA	5.41313
TCGA-BH-A0BZ-01	Tumor	BRCA	3.80842
TCGA-BH-A0RX-01	Tumor	BRCA	2.07037
TCGA-C8-A1HE-01	Tumor	BRCA	3.36459
TCGA-C8-A26Z-01	Tumor	BRCA	3.2234
TCGA-C8-A8HP-01	Tumor	BRCA	5.36461
TCGA-D8-A1JC-01	Tumor	BRCA	4.93926
TCGA-D8-A1JM-01	Tumor	BRCA	6.18386
TCGA-D8-A27M-01	Tumor	BRCA	4.25171
TCGA-E2-A1LA-01	Tumor	BRCA	3.49696
TCGA-E2-A1LH-01	Tumor	BRCA	4.16827
TCGA-E9-A247-01	Tumor	BRCA	3.16834
TCGA-EW-A1J5-01	Tumor	BRCA	2.59696
TCGA-EW-A1P7-01	Tumor	BRCA	3.38266
TCGA-EW-A1PA-01	Tumor	BRCA	3.23421
TCGA-EW-A2FR-01	Tumor	BRCA	4.62877
TCGA-OK-A5Q2-01	Tumor	BRCA	4.63923
TCGA-OL-A66N-01	Tumor	BRCA	3.0144
TCGA-A2-A0ET-01	Tumor	BRCA	2.85799
TCGA-A8-A07L-01	Tumor	BRCA	3.88361
TCGA-A8-A082-01	Tumor	BRCA	2.78244
TCGA-A8-A09B-01	Tumor	BRCA	4.63462
TCGA-AC-A2QH-01	Tumor	BRCA	1.91536
TCGA-AN-A04D-01	Tumor	BRCA	6.00984
TCGA-AN-A0FV-01	Tumor	BRCA	6.43466
TCGA-AR-A250-01	Tumor	BRCA	5.04745
TCGA-B6-A0WS-01	Tumor	BRCA	2.62758
TCGA-B6-A0WW-01	Tumor	BRCA	2.84998
TCGA-BH-A0W3-01	Tumor	BRCA	4.45744
TCGA-BH-A8FZ-01	Tumor	BRCA	3.28536
TCGA-C8-A12N-01	Tumor	BRCA	4.85701
TCGA-C8-A26W-01	Tumor	BRCA	3.75167
TCGA-C8-A26X-01	Tumor	BRCA	5.47087
TCGA-D8-A27I-01	Tumor	BRCA	2.84998
TCGA-E2-A155-01	Tumor	BRCA	1.92597
TCGA-E2-A15K-01	Tumor	BRCA	5.30961
TCGA-E9-A1N9-01	Tumor	BRCA	3.92888
TCGA-E9-A1NA-01	Tumor	BRCA	4.37851
TCGA-E9-A1R0-01	Tumor	BRCA	3.92888
TCGA-E9-A228-01	Tumor	BRCA	1.257
TCGA-EW-A1OW-01	Tumor	BRCA	4.97681
TCGA-EW-A1P8-01	Tumor	BRCA	4.2234
TCGA-GI-A2C9-01	Tumor	BRCA	3.7538
TCGA-GM-A2DH-01	Tumor	BRCA	5.27384
TCGA-GM-A2DK-01	Tumor	BRCA	2.26004
TCGA-GM-A2DN-01	Tumor	BRCA	3.31465
TCGA-A2-A3Y0-01	Tumor	BRCA	5.09723
TCGA-A7-A0CE-01	Tumor	BRCA	4.65939
TCGA-A7-A0CJ-01	Tumor	BRCA	2.95237
TCGA-A8-A07C-01	Tumor	BRCA	4.53973
TCGA-A8-A09N-01	Tumor	BRCA	5.35368
TCGA-A8-A0A7-01	Tumor	BRCA	2.34481
TCGA-AO-A03R-01	Tumor	BRCA	1.4489
TCGA-AR-A24Z-01	Tumor	BRCA	3.37299
TCGA-B6-A0RM-01	Tumor	BRCA	3.42087
TCGA-B6-A1KN-01	Tumor	BRCA	3.16026
TCGA-D8-A146-01	Tumor	BRCA	5.11189
TCGA-D8-A1XM-01	Tumor	BRCA	2.57287
TCGA-E2-A1IJ-01	Tumor	BRCA	4.78977
TCGA-E2-A1LI-01	Tumor	BRCA	4.87285
TCGA-GM-A2DC-01	Tumor	BRCA	6.98998
TCGA-GM-A2DM-01	Tumor	BRCA	3.87475
TCGA-OL-A5RZ-01	Tumor	BRCA	2.82984
TCGA-A1-A0SE-01	Tumor	BRCA	3.39505
TCGA-A2-A0EP-01	Tumor	BRCA	2.97635
TCGA-A2-A0YT-01	Tumor	BRCA	4.96713
TCGA-A7-A4SB-01	Tumor	BRCA	2.2141
TCGA-AC-A7VC-01	Tumor	BRCA	1.48543
TCGA-AN-A0AM-01	Tumor	BRCA	4.10517
TCGA-AN-A0G0-01	Tumor	BRCA	4.47186
TCGA-AO-A0JI-01	Tumor	BRCA	1.65077
TCGA-BH-A0AW-01	Tumor	BRCA	5.87133
TCGA-BH-A0B0-01	Tumor	BRCA	3.91935
TCGA-BH-A0BF-01	Tumor	BRCA	3.21724
TCGA-BH-A0BT-01	Tumor	BRCA	6.07701
TCGA-BH-A0HL-01	Tumor	BRCA	3.04441
TCGA-BH-A0HQ-01	Tumor	BRCA	5.24755
TCGA-BH-A18J-01	Tumor	BRCA	5.5182
TCGA-BH-A18Q-01	Tumor	BRCA	5.52984
TCGA-C8-A132-01	Tumor	BRCA	4.48093
TCGA-C8-A1HN-01	Tumor	BRCA	4.1326
TCGA-C8-A275-01	Tumor	BRCA	5.14327
TCGA-D8-A1JH-01	Tumor	BRCA	3.8258
TCGA-D8-A1XO-01	Tumor	BRCA	3.77502
TCGA-D8-A1XR-01	Tumor	BRCA	5.32803
TCGA-D8-A1XU-01	Tumor	BRCA	4.0522
TCGA-D8-A3Z6-01	Tumor	BRCA	5.87015
TCGA-E2-A152-01	Tumor	BRCA	5.87428
TCGA-E9-A1RC-01	Tumor	BRCA	5.79156
TCGA-E9-A22E-01	Tumor	BRCA	3.85203
TCGA-EW-A1OV-01	Tumor	BRCA	3.19219
TCGA-EW-A1OZ-01	Tumor	BRCA	5.1457
TCGA-EW-A1PE-01	Tumor	BRCA	4.07721
TCGA-HN-A2NL-01	Tumor	BRCA	2.18585
TCGA-LL-A442-01	Tumor	BRCA	3.91645
TCGA-3C-AAAU-01	Tumor	BRCA	3.08748
TCGA-A2-A0T1-01	Tumor	BRCA	4.11017
TCGA-A2-A3KC-01	Tumor	BRCA	3.63688
TCGA-A7-A26F-01	Tumor	BRCA	3.38711
TCGA-AN-A0AR-01	Tumor	BRCA	4.42758
TCGA-AN-A0FS-01	Tumor	BRCA	3.8258
TCGA-AN-A0FY-01	Tumor	BRCA	4.57957
TCGA-AN-A0XR-01	Tumor	BRCA	6.69785
TCGA-AQ-A7U7-01	Tumor	BRCA	2.69376
TCGA-AR-A24W-01	Tumor	BRCA	3.73446
TCGA-AR-A2LH-01	Tumor	BRCA	4.40194
TCGA-B6-A408-01	Tumor	BRCA	4.43359
TCGA-BH-A0BS-01	Tumor	BRCA	4.10018
TCGA-BH-A0HB-01	Tumor	BRCA	3.52232
TCGA-BH-A1ET-01	Tumor	BRCA	4.87729
TCGA-C8-A12P-01	Tumor	BRCA	5.20871
TCGA-C8-A12V-01	Tumor	BRCA	2.21724
TCGA-D8-A1XK-01	Tumor	BRCA	1.60879
TCGA-D8-A27W-01	Tumor	BRCA	2.65993
TCGA-E2-A14X-01	Tumor	BRCA	5.4825
TCGA-EW-A1P0-01	Tumor	BRCA	1.541
TCGA-LL-A73Z-01	Tumor	BRCA	3.79394
TCGA-WT-AB41-01	Tumor	BRCA	3.3377
TCGA-A1-A0SF-01	Tumor	BRCA	4.33342
TCGA-A1-A0SK-01	Tumor	BRCA	5.37086
TCGA-A2-A0CR-01	Tumor	BRCA	2.25095
TCGA-A2-A0EO-01	Tumor	BRCA	3.69261
TCGA-A7-A4SE-01	Tumor	BRCA	6.09208
TCGA-A7-A4SF-01	Tumor	BRCA	5.52201
TCGA-A8-A0AB-01	Tumor	BRCA	5.35651
TCGA-AC-A3QQ-01	Tumor	BRCA	2.15543
TCGA-AN-A0XT-01	Tumor	BRCA	2.66902
TCGA-AN-A0XU-01	Tumor	BRCA	4.54165
TCGA-AO-A03P-01	Tumor	BRCA	3.69261
TCGA-AO-A0JJ-01	Tumor	BRCA	2.65538
TCGA-AR-A0TY-01	Tumor	BRCA	4.23419
TCGA-AR-A0U4-01	Tumor	BRCA	2.88943
TCGA-AR-A1AS-01	Tumor	BRCA	6.94683
TCGA-AR-A24N-01	Tumor	BRCA	5.49922
TCGA-AR-A5QP-01	Tumor	BRCA	2.78244
TCGA-B6-A0X0-01	Tumor	BRCA	3.89144
TCGA-BH-A0BM-01	Tumor	BRCA	4.10263
TCGA-BH-A0BO-01	Tumor	BRCA	3.83389
TCGA-BH-A0DV-01	Tumor	BRCA	4.15949
TCGA-BH-A0HX-01	Tumor	BRCA	3.3277
TCGA-BH-A8G0-01	Tumor	BRCA	3.53731
TCGA-C8-A138-01	Tumor	BRCA	5.18225
TCGA-D8-A1JB-01	Tumor	BRCA	3.0215
TCGA-D8-A1JI-01	Tumor	BRCA	2.30741
TCGA-D8-A1JJ-01	Tumor	BRCA	4.96529
TCGA-D8-A3Z5-01	Tumor	BRCA	4.77396
TCGA-E2-A107-01	Tumor	BRCA	4.60344
TCGA-E2-A10C-01	Tumor	BRCA	4.95145
TCGA-E9-A244-01	Tumor	BRCA	5.56223
TCGA-GM-A2DO-01	Tumor	BRCA	2.28392
TCGA-LD-A7W6-01	Tumor	BRCA	2.69156
TCGA-PL-A8LV-01	Tumor	BRCA	5.33125
TCGA-A2-A04Y-01	Tumor	BRCA	4.18982
TCGA-A2-A0EW-01	Tumor	BRCA	3.40601
TCGA-A2-A0YH-01	Tumor	BRCA	3.98914
TCGA-A7-A2KD-01	Tumor	BRCA	3.0179
TCGA-A8-A08I-01	Tumor	BRCA	2.52858
TCGA-AO-A0JE-01	Tumor	BRCA	4.86541
TCGA-AR-A0TT-01	Tumor	BRCA	4.44828
TCGA-BH-A0B3-01	Tumor	BRCA	5.01478
TCGA-BH-A0E9-01	Tumor	BRCA	4.28471
TCGA-BH-A18I-01	Tumor	BRCA	2.49822
TCGA-BH-A1F2-01	Tumor	BRCA	2.3363
TCGA-BH-AB28-01	Tumor	BRCA	2.96343
TCGA-C8-A1HJ-01	Tumor	BRCA	4.14571
TCGA-C8-A1HK-01	Tumor	BRCA	4.84851
TCGA-C8-A8HQ-01	Tumor	BRCA	3.72679
TCGA-D8-A1XW-01	Tumor	BRCA	4.16025
TCGA-D8-A27T-01	Tumor	BRCA	3.99636
TCGA-D8-A73X-01	Tumor	BRCA	4.17309
TCGA-E2-A14V-01	Tumor	BRCA	3.76872
TCGA-E2-A1BD-01	Tumor	BRCA	5.98887
TCGA-EW-A1IZ-01	Tumor	BRCA	3.07037
TCGA-EW-A1PG-01	Tumor	BRCA	2.78449
TCGA-GM-A2DD-01	Tumor	BRCA	5.76181
TCGA-GM-A2DF-01	Tumor	BRCA	3.74519
TCGA-3C-AALK-01	Tumor	BRCA	4.8022
TCGA-5T-A9QA-01	Tumor	BRCA	2.6182
TCGA-A1-A0SI-01	Tumor	BRCA	6.71122
TCGA-A2-A0CX-01	Tumor	BRCA	6.62765
TCGA-A2-A0ES-01	Tumor	BRCA	2.78449
TCGA-A7-A4SD-01	Tumor	BRCA	2.80941
TCGA-A8-A08B-01	Tumor	BRCA	4.22037
TCGA-A8-A08J-01	Tumor	BRCA	5.6398
TCGA-A8-A08R-01	Tumor	BRCA	4.31252
TCGA-AN-A0FX-01	Tumor	BRCA	4.78187
TCGA-AR-A1AM-01	Tumor	BRCA	3.87578
TCGA-AR-A24V-01	Tumor	BRCA	2.45678
TCGA-AR-A24X-01	Tumor	BRCA	4.46794
TCGA-BH-A0AV-01	Tumor	BRCA	4.12185
TCGA-BH-A0E1-01	Tumor	BRCA	2.88364
TCGA-BH-A0HU-01	Tumor	BRCA	3.03211
TCGA-C8-A130-01	Tumor	BRCA	4.00808
TCGA-C8-A134-01	Tumor	BRCA	3.6218
TCGA-D8-A13Y-01	Tumor	BRCA	4.03032
TCGA-E2-A14T-01	Tumor	BRCA	5.9081
TCGA-E2-A1L8-01	Tumor	BRCA	4.43559
TCGA-E9-A1N6-01	Tumor	BRCA	6.16631
TCGA-E9-A243-01	Tumor	BRCA	3.07725
TCGA-EW-A1PH-01	Tumor	BRCA	4.34911
TCGA-EW-A2FW-01	Tumor	BRCA	2.65993
TCGA-GM-A2DI-01	Tumor	BRCA	4.64614
TCGA-LD-A7W5-01	Tumor	BRCA	5.03126
TCGA-OL-A5RY-01	Tumor	BRCA	3.06007
TCGA-A2-A0T7-01	Tumor	BRCA	4.52423
TCGA-A7-A6VV-01	Tumor	BRCA	5.22457
TCGA-A8-A07O-01	Tumor	BRCA	6.76382
TCGA-A8-A09V-01	Tumor	BRCA	4.04525
TCGA-AC-A7VB-01	Tumor	BRCA	3.86497
TCGA-AN-A04C-01	Tumor	BRCA	5.35583
TCGA-AO-A12E-01	Tumor	BRCA	2.66902
TCGA-AO-A1KR-01	Tumor	BRCA	4.97633
TCGA-AQ-A54N-01	Tumor	BRCA	4.35406
TCGA-AR-A1AH-01	Tumor	BRCA	5.34656
TCGA-AR-A251-01	Tumor	BRCA	3.53484
TCGA-B6-A0IA-01	Tumor	BRCA	5.39887
TCGA-B6-A0RH-01	Tumor	BRCA	5.90063
TCGA-B6-A40C-01	Tumor	BRCA	3.60995
TCGA-BH-A0BA-01	Tumor	BRCA	5.95817
TCGA-BH-A0EI-01	Tumor	BRCA	2.0356
TCGA-BH-A1F6-01	Tumor	BRCA	4.35615
TCGA-BH-A5IZ-01	Tumor	BRCA	6.14817
TCGA-D8-A13Z-01	Tumor	BRCA	3.41552
TCGA-D8-A143-01	Tumor	BRCA	3.63108
TCGA-D8-A1JU-01	Tumor	BRCA	3.40736
TCGA-E2-A153-01	Tumor	BRCA	5.27316
TCGA-E2-A15J-01	Tumor	BRCA	4.98959
TCGA-E2-A1II-01	Tumor	BRCA	1.70046
TCGA-E9-A1NI-01	Tumor	BRCA	5.07083
TCGA-E9-A1R2-01	Tumor	BRCA	3.29865
TCGA-E9-A248-01	Tumor	BRCA	4.02769
TCGA-EW-A424-01	Tumor	BRCA	3.16674
TCGA-OL-A5RX-01	Tumor	BRCA	4.58072
TCGA-S3-AA15-01	Tumor	BRCA	2.30741
TCGA-3C-AALI-01	Tumor	BRCA	2.94488
TCGA-4H-AAAK-01	Tumor	BRCA	3.30162
TCGA-A1-A0SN-01	Tumor	BRCA	3.15866
TCGA-A2-A04W-01	Tumor	BRCA	4.6542
TCGA-A2-A0T6-01	Tumor	BRCA	2.86196
TCGA-A2-A1G6-01	Tumor	BRCA	2.65076
TCGA-A2-A25C-01	Tumor	BRCA	3.76344
TCGA-A7-A26G-01	Tumor	BRCA	1.85598
TCGA-A7-A426-01	Tumor	BRCA	3.88361
TCGA-AC-A23E-01	Tumor	BRCA	4.75431
TCGA-AC-A3TM-01	Tumor	BRCA	4.1243
TCGA-AO-A0JB-01	Tumor	BRCA	3.69824
TCGA-AR-A0TW-01	Tumor	BRCA	5.42123
TCGA-AR-A1AR-01	Tumor	BRCA	2.49312
TCGA-AR-A252-01	Tumor	BRCA	2.12102
TCGA-AR-A254-01	Tumor	BRCA	4.05747
TCGA-B6-A0IG-01	Tumor	BRCA	5.19655
TCGA-B6-A0WZ-01	Tumor	BRCA	5.50841
TCGA-B6-A3ZX-01	Tumor	BRCA	4.96529
TCGA-BH-A18F-01	Tumor	BRCA	4.95697
TCGA-BH-A18L-01	Tumor	BRCA	3.48412
TCGA-BH-A18R-01	Tumor	BRCA	3.97546
TCGA-BH-A28O-01	Tumor	BRCA	4.30303
TCGA-C8-A12O-01	Tumor	BRCA	3.59453
TCGA-C8-A1HG-01	Tumor	BRCA	3.04793
TCGA-E2-A14Q-01	Tumor	BRCA	4.26451
TCGA-E2-A159-01	Tumor	BRCA	4.5273
TCGA-E2-A1B0-01	Tumor	BRCA	5.21533
TCGA-E2-A1LG-01	Tumor	BRCA	6.15221
TCGA-EW-A1J2-01	Tumor	BRCA	3.20636
TCGA-EW-A1PF-01	Tumor	BRCA	5.46891
TCGA-GM-A2DL-01	Tumor	BRCA	3.29721
TCGA-LL-A5YO-01	Tumor	BRCA	3.35195
TCGA-LL-A6FR-01	Tumor	BRCA	5.76603
TCGA-A2-A1G0-01	Tumor	BRCA	4.11855
TCGA-A2-A3XX-01	Tumor	BRCA	6.10499
TCGA-A2-A3XY-01	Tumor	BRCA	5.1526
TCGA-A2-A4RW-01	Tumor	BRCA	4.24792
TCGA-AC-A6IX-01	Tumor	BRCA	4.58801
TCGA-AO-A0JG-01	Tumor	BRCA	2.14403
TCGA-AQ-A1H3-01	Tumor	BRCA	4.44227
TCGA-AR-A1AQ-01	Tumor	BRCA	3.71154
TCGA-AR-A24Q-01	Tumor	BRCA	3.89144
TCGA-AR-A2LM-01	Tumor	BRCA	3.65307
TCGA-AR-A2LR-01	Tumor	BRCA	6.40738
TCGA-B6-A0I5-01	Tumor	BRCA	5.04833
TCGA-B6-A0I6-01	Tumor	BRCA	5.20277
TCGA-BH-A0DK-01	Tumor	BRCA	2.32772
TCGA-BH-A0E2-01	Tumor	BRCA	4.15789
TCGA-BH-A0W7-01	Tumor	BRCA	3.59453
TCGA-C8-A12W-01	Tumor	BRCA	3.93075
TCGA-C8-A8HR-01	Tumor	BRCA	3.30593
TCGA-D8-A27L-01	Tumor	BRCA	3.91841
TCGA-E9-A3HO-01	Tumor	BRCA	2.66902
TCGA-GM-A3XL-01	Tumor	BRCA	2.55094
TCGA-JL-A3YW-01	Tumor	BRCA	4.09764
TCGA-LL-A5YP-01	Tumor	BRCA	3.6264
TCGA-LL-A7SZ-01	Tumor	BRCA	2.44623
TCGA-OL-A6VQ-01	Tumor	BRCA	3.80118
TCGA-A2-A04Q-01	Tumor	BRCA	3.81251
TCGA-A2-A0SX-01	Tumor	BRCA	4.38613
TCGA-A2-A0YE-01	Tumor	BRCA	4.68927
TCGA-A2-A0YL-01	Tumor	BRCA	3.48803
TCGA-A7-A5ZX-01	Tumor	BRCA	4.48284
TCGA-A7-A6VW-01	Tumor	BRCA	3.59334
TCGA-A7-A6VY-01	Tumor	BRCA	4.62934
TCGA-A8-A092-01	Tumor	BRCA	4.30673
TCGA-AC-A2QJ-01	Tumor	BRCA	2.14078
TCGA-AO-A0J5-01	Tumor	BRCA	2.87378
TCGA-AQ-A04L-01	Tumor	BRCA	4.95929
TCGA-B6-A0X1-01	Tumor	BRCA	2.97635
TCGA-BH-A0C7-01	Tumor	BRCA	3.55212
TCGA-BH-A0HO-01	Tumor	BRCA	3.96535
TCGA-BH-A18V-01	Tumor	BRCA	5.18546
TCGA-BH-A208-01	Tumor	BRCA	3.40736
TCGA-C8-A27A-01	Tumor	BRCA	2.95602
TCGA-C8-A27B-01	Tumor	BRCA	2.87188
TCGA-D8-A1J9-01	Tumor	BRCA	5.29538
TCGA-E2-A150-01	Tumor	BRCA	2.88753
TCGA-E2-A573-01	Tumor	BRCA	3.56319
TCGA-E9-A1N8-01	Tumor	BRCA	3.58976
TCGA-E9-A1RA-01	Tumor	BRCA	2.73768
TCGA-E9-A3X8-01	Tumor	BRCA	2.81147
TCGA-EW-A1IX-01	Tumor	BRCA	2.93922
TCGA-EW-A1P3-01	Tumor	BRCA	2.78244
TCGA-OL-A6VR-01	Tumor	BRCA	2.91455
TCGA-A2-A04U-01	Tumor	BRCA	4.48026
TCGA-A2-A3KD-01	Tumor	BRCA	3.36594
TCGA-A7-A5ZW-01	Tumor	BRCA	4.3205
TCGA-A8-A09D-01	Tumor	BRCA	3.44228
TCGA-AC-A6IV-01	Tumor	BRCA	2.69376
TCGA-AO-A12A-01	Tumor	BRCA	4.00001
TCGA-AR-A0U2-01	Tumor	BRCA	4.90251
TCGA-AR-A1AI-01	Tumor	BRCA	2.38956
TCGA-AR-A1AO-01	Tumor	BRCA	4.28319
TCGA-AR-A24P-01	Tumor	BRCA	3.39921
TCGA-AR-A24U-01	Tumor	BRCA	1.8115
TCGA-B6-A401-01	Tumor	BRCA	4.64844
TCGA-B6-A402-01	Tumor	BRCA	5.82397
TCGA-BH-A0AZ-01	Tumor	BRCA	4.09849
TCGA-BH-A0B6-01	Tumor	BRCA	3.1293
TCGA-BH-A0BD-01	Tumor	BRCA	3.3813
TCGA-BH-A0C3-01	Tumor	BRCA	5.85197
TCGA-BH-A1FH-01	Tumor	BRCA	2.89332
TCGA-C8-A26V-01	Tumor	BRCA	3.87774
TCGA-D8-A27K-01	Tumor	BRCA	4.62349
TCGA-E2-A10F-01	Tumor	BRCA	3.60288
TCGA-E2-A15D-01	Tumor	BRCA	5.10597
TCGA-E2-A570-01	Tumor	BRCA	4.94487
TCGA-E9-A22G-01	Tumor	BRCA	4.96761
TCGA-E9-A245-01	Tumor	BRCA	3.54965
TCGA-S3-AA14-01	Tumor	BRCA	4.5904
TCGA-A2-A0CZ-01	Tumor	BRCA	2.27201
TCGA-A2-A0EX-01	Tumor	BRCA	3.26303
TCGA-A2-A3XV-01	Tumor	BRCA	4.68255
TCGA-A2-A3XZ-01	Tumor	BRCA	2.7803
TCGA-A2-A4RY-01	Tumor	BRCA	3.95702
TCGA-AC-A3BB-01	Tumor	BRCA	3.75593
TCGA-AO-A1KO-01	Tumor	BRCA	2.6848
TCGA-AR-A0TS-01	Tumor	BRCA	4.02328
TCGA-AR-A1AN-01	Tumor	BRCA	5.21805
TCGA-AR-A24K-01	Tumor	BRCA	4.20164
TCGA-AR-A24T-01	Tumor	BRCA	2.26907
TCGA-AR-A2LO-01	Tumor	BRCA	3.46337
TCGA-B6-A0I8-01	Tumor	BRCA	3.08748
TCGA-BH-A0H3-01	Tumor	BRCA	3.45019
TCGA-BH-A0W4-01	Tumor	BRCA	4.21176
TCGA-BH-A18K-01	Tumor	BRCA	5.24871
TCGA-BH-A28Q-01	Tumor	BRCA	3.0858
TCGA-BH-A6R8-01	Tumor	BRCA	5.0206
TCGA-C8-A12U-01	Tumor	BRCA	7.49143
TCGA-E2-A1B5-01	Tumor	BRCA	2.38681
TCGA-E2-A1LS-01	Tumor	BRCA	5.61854
TCGA-GM-A2DA-01	Tumor	BRCA	3.30162
TCGA-GM-A3XG-01	Tumor	BRCA	3.79598
TCGA-JL-A3YX-01	Tumor	BRCA	5.54354
TCGA-LL-A5YN-01	Tumor	BRCA	3.466
TCGA-XX-A899-01	Tumor	BRCA	2.59696
TCGA-Z7-A8R6-01	Tumor	BRCA	5.545
TCGA-A1-A0SQ-01	Tumor	BRCA	3.19219
TCGA-A2-A0D2-01	Tumor	BRCA	2.73556
TCGA-A2-A3XT-01	Tumor	BRCA	4.74257
TCGA-A8-A08O-01	Tumor	BRCA	3.50462
TCGA-A8-A095-01	Tumor	BRCA	3.65537
TCGA-AC-A2FK-01	Tumor	BRCA	3.57776
TCGA-AN-A0FZ-01	Tumor	BRCA	4.91692
TCGA-AQ-A04J-01	Tumor	BRCA	4.57172
TCGA-AR-A24R-01	Tumor	BRCA	4.21024
TCGA-AR-A256-01	Tumor	BRCA	4.56013
TCGA-B6-A0I2-01	Tumor	BRCA	4.85151
TCGA-B6-A0IN-01	Tumor	BRCA	2.45939
TCGA-BH-A0AU-01	Tumor	BRCA	3.45946
TCGA-BH-A0H5-01	Tumor	BRCA	2.89921
TCGA-BH-A1EV-01	Tumor	BRCA	6.4308
TCGA-BH-A2L8-01	Tumor	BRCA	2.96902
TCGA-C8-A12Z-01	Tumor	BRCA	5.76603
TCGA-D8-A147-01	Tumor	BRCA	4.14892
TCGA-D8-A1XF-01	Tumor	BRCA	4.09086
TCGA-E2-A15A-01	Tumor	BRCA	4.41823
TCGA-E2-A1B1-01	Tumor	BRCA	2.96902
TCGA-E2-A1IG-01	Tumor	BRCA	2.56564
TCGA-E9-A1N5-01	Tumor	BRCA	3.851
TCGA-E9-A226-01	Tumor	BRCA	4.39641
TCGA-E9-A249-01	Tumor	BRCA	3.57171
TCGA-E9-A6HE-01	Tumor	BRCA	3.87186
TCGA-HN-A2OB-01	Tumor	BRCA	3.68818
TCGA-A2-A25A-01	Tumor	BRCA	4.13751
TCGA-A7-A13F-01	Tumor	BRCA	2.01432
TCGA-B6-A0RI-01	Tumor	BRCA	6.14136
TCGA-B6-A409-01	Tumor	BRCA	5.45846
TCGA-BH-A0B9-01	Tumor	BRCA	2.85998
TCGA-BH-A1FM-01	Tumor	BRCA	2.88554
TCGA-BH-A1FU-01	Tumor	BRCA	4.80732
TCGA-C8-A12Y-01	Tumor	BRCA	4.92127
TCGA-E2-A15I-01	Tumor	BRCA	4.64326
TCGA-E2-A1B6-01	Tumor	BRCA	5.28797
TCGA-E2-A1L6-01	Tumor	BRCA	2.90692
TCGA-E2-A574-01	Tumor	BRCA	3.03914
TCGA-GM-A3XN-01	Tumor	BRCA	3.61702
TCGA-LD-A66U-01	Tumor	BRCA	3.29281
TCGA-MS-A51U-01	Tumor	BRCA	3.69935
TCGA-A8-A08X-01	Tumor	BRCA	4.67351
TCGA-AC-A6NO-01	Tumor	BRCA	4.73496
TCGA-AO-A12D-01	Tumor	BRCA	5.82652
TCGA-AR-A0TP-01	Tumor	BRCA	4.70764
TCGA-AR-A0TZ-01	Tumor	BRCA	3.07725
TCGA-AR-A24O-01	Tumor	BRCA	2.97818
TCGA-B6-A400-01	Tumor	BRCA	5.72216
TCGA-BH-A0DZ-01	Tumor	BRCA	3.95328
TCGA-C8-A12T-01	Tumor	BRCA	3.99458
TCGA-E2-A158-01	Tumor	BRCA	6.28559
TCGA-E2-A3DX-01	Tumor	BRCA	2.94296
TCGA-E9-A1RI-01	Tumor	BRCA	2.98552
TCGA-EW-A1OX-01	Tumor	BRCA	2.2141
TCGA-EW-A1P4-01	Tumor	BRCA	2.85998
TCGA-OL-A5RV-01	Tumor	BRCA	4.70427
TCGA-OL-A6VO-01	Tumor	BRCA	6.05159
TCGA-5L-AAT0-01	Tumor	BRCA	3.51219
TCGA-A2-A0D3-01	Tumor	BRCA	6.12658
TCGA-A2-A3XW-01	Tumor	BRCA	5.53326
TCGA-A8-A075-01	Tumor	BRCA	5.2091
TCGA-AO-A03T-01	Tumor	BRCA	3.89144
TCGA-AO-A12C-01	Tumor	BRCA	3.36874
TCGA-B6-A0IJ-01	Tumor	BRCA	3.26303
TCGA-B6-A0RV-01	Tumor	BRCA	2.57046
TCGA-BH-A0B7-01	Tumor	BRCA	5.85973
TCGA-BH-A0DQ-01	Tumor	BRCA	3.82375
TCGA-E9-A227-01	Tumor	BRCA	3.0108
TCGA-E9-A22H-01	Tumor	BRCA	4.79237
TCGA-A2-A0CV-01	Tumor	BRCA	3.15546
TCGA-A8-A08G-01	Tumor	BRCA	4.09425
TCGA-AC-A2BM-01	Tumor	BRCA	3.51977
TCGA-AN-A0AL-01	Tumor	BRCA	2.43293
TCGA-AO-A03V-01	Tumor	BRCA	5.36529
TCGA-AO-A0J2-01	Tumor	BRCA	4.89768
TCGA-AO-A0J4-01	Tumor	BRCA	4.93877
TCGA-BH-A0BJ-01	Tumor	BRCA	3.55953
TCGA-BH-A0DT-01	Tumor	BRCA	4.61121
TCGA-BH-A42V-01	Tumor	BRCA	3.53731
TCGA-D8-A1JD-01	Tumor	BRCA	4.27276
TCGA-D8-A27R-01	Tumor	BRCA	3.27199
TCGA-E2-A10A-01	Tumor	BRCA	3.43293
TCGA-E2-A1LB-01	Tumor	BRCA	5.16835
TCGA-E9-A1N4-01	Tumor	BRCA	2.25095
TCGA-E9-A5UO-01	Tumor	BRCA	2.32484
TCGA-EW-A2FS-01	Tumor	BRCA	2.18273
TCGA-PE-A5DE-01	Tumor	BRCA	4.16667
TCGA-A1-A0SP-01	Tumor	BRCA	3.57776
TCGA-A2-A0CM-01	Tumor	BRCA	5.16708
TCGA-A7-A4SA-01	Tumor	BRCA	2.39232
TCGA-A8-A09A-01	Tumor	BRCA	2.79913
TCGA-AC-A2FF-01	Tumor	BRCA	2.92975
TCGA-AO-A0JM-01	Tumor	BRCA	2.8699
TCGA-AR-A2LJ-01	Tumor	BRCA	2.43293
TCGA-B6-A0IQ-01	Tumor	BRCA	5.36598
TCGA-B6-A0RU-01	Tumor	BRCA	4.97952
TCGA-B6-A0WX-01	Tumor	BRCA	4.30739
TCGA-B6-A0WY-01	Tumor	BRCA	3.73122
TCGA-BH-A0B5-01	Tumor	BRCA	3.6218
TCGA-C8-A1HI-01	Tumor	BRCA	5.36383
TCGA-D8-A141-01	Tumor	BRCA	4.88705
TCGA-D8-A1X7-01	Tumor	BRCA	3.29569
TCGA-D8-A27F-01	Tumor	BRCA	5.38374
TCGA-E2-A15E-01	Tumor	BRCA	4.54414
TCGA-E2-A1L7-01	Tumor	BRCA	3.35051
TCGA-E2-A1L9-01	Tumor	BRCA	5.96762
TCGA-E9-A1RB-01	Tumor	BRCA	3.91169
TCGA-OL-A5D8-01	Tumor	BRCA	6.40461
TCGA-OL-A5RW-01	Tumor	BRCA	4.37366
TCGA-A1-A0SH-01	Tumor	BRCA	3.0635
TCGA-A1-A0SJ-01	Tumor	BRCA	2.47513
TCGA-A2-A04V-01	Tumor	BRCA	2.09758
TCGA-A2-A0T5-01	Tumor	BRCA	4.44694
TCGA-A2-A0YJ-01	Tumor	BRCA	5.67019
TCGA-A2-A25B-01	Tumor	BRCA	2.64151
TCGA-AO-A126-01	Tumor	BRCA	2.63689
TCGA-AR-A1AU-01	Tumor	BRCA	4.25474
TCGA-B6-A0RT-01	Tumor	BRCA	4.71091
TCGA-BH-A0BQ-01	Tumor	BRCA	3.91935
TCGA-BH-A18M-01	Tumor	BRCA	3.47638
TCGA-EW-A2FV-01	Tumor	BRCA	3.88463
TCGA-OL-A66O-01	Tumor	BRCA	4.07891
TCGA-AO-A124-01	Tumor	BRCA	4.36385
TCGA-AR-A24M-01	Tumor	BRCA	4.51285
TCGA-B6-A0IE-01	Tumor	BRCA	4.6496
TCGA-B6-A0RS-01	Tumor	BRCA	6.20852
TCGA-BH-A0E0-01	Tumor	BRCA	6.60211
TCGA-BH-A1EW-01	Tumor	BRCA	3.50079
TCGA-C8-A1HL-01	Tumor	BRCA	2.35333
TCGA-E2-A15H-01	Tumor	BRCA	6.60112
TCGA-E9-A22D-01	Tumor	BRCA	2.25395
TCGA-EW-A1IY-01	Tumor	BRCA	4.4751
TCGA-EW-A1J1-01	Tumor	BRCA	4.55706
TCGA-A2-A0CL-01	Tumor	BRCA	3.29569
TCGA-A2-A0D4-01	Tumor	BRCA	3.04793
TCGA-A2-A0T3-01	Tumor	BRCA	3.23573
TCGA-A7-A0D9-01	Tumor	BRCA	1.99637
TCGA-E2-A14N-01	Tumor	BRCA	4.51601
TCGA-E2-A1IO-01	Tumor	BRCA	4.39298
TCGA-E9-A229-01	Tumor	BRCA	2.59696
TCGA-A2-A04P-01	Tumor	BRCA	5.26381
TCGA-A2-A04R-01	Tumor	BRCA	3.36034
TCGA-AN-A04A-01	Tumor	BRCA	2.70265
TCGA-AN-A0XW-01	Tumor	BRCA	2.57529
TCGA-AO-A0JA-01	Tumor	BRCA	5.13336
TCGA-AO-A12F-01	Tumor	BRCA	4.58494
TCGA-D8-A1XD-01	Tumor	BRCA	3.81455
TCGA-D8-A27N-01	Tumor	BRCA	5.27579
TCGA-OL-A66I-01	Tumor	BRCA	2.97818
TCGA-A2-A3XU-01	Tumor	BRCA	6.44672
TCGA-A8-A07J-01	Tumor	BRCA	2.67805
TCGA-AR-A0TU-01	Tumor	BRCA	4.33266
TCGA-BH-A0BL-01	Tumor	BRCA	4.02149
TCGA-BH-A1ES-01	Tumor	BRCA	3.50335
TCGA-E2-A14Y-01	Tumor	BRCA	5.76152
TCGA-PL-A8LX-01	Tumor	BRCA	1.92221
TCGA-A2-A04X-01	Tumor	BRCA	4.11271
[truncated: 16,104 more rows]

## Sheet: Table SIII
Table SI. Expression levels of EFNA3 among paired samples in various types of cancer.
Sample ID	Group	Tumour type	EFNA3 expression level
TCGA-22-4593	Tumor	LUSC	3.04672
TCGA-22-4593	Normal	LUSC	0.763497
TCGA-22-4609	Tumor	LUSC	4.13116
TCGA-22-4609	Normal	LUSC	0.787683
TCGA-22-5471	Tumor	LUSC	3.85737
TCGA-22-5471	Normal	LUSC	0.921208
TCGA-22-5472	Tumor	LUSC	3.67871
TCGA-22-5472	Normal	LUSC	0.88924
TCGA-22-5478	Tumor	LUSC	4.33842
TCGA-22-5478	Normal	LUSC	0.769433
TCGA-22-5481	Tumor	LUSC	3.52123
TCGA-22-5481	Normal	LUSC	0.96451
TCGA-22-5482	Tumor	LUSC	5.18564
TCGA-22-5482	Normal	LUSC	0.812621
TCGA-22-5483	Tumor	LUSC	2.39083
TCGA-22-5483	Normal	LUSC	0.66612
TCGA-22-5489	Tumor	LUSC	2.89765
TCGA-22-5489	Normal	LUSC	0.957766
TCGA-22-5491	Tumor	LUSC	3.27824
TCGA-22-5491	Normal	LUSC	0.71396
TCGA-33-4587	Tumor	LUSC	5.67601
TCGA-33-4587	Normal	LUSC	1.35659
TCGA-33-6737	Tumor	LUSC	3.13172
TCGA-33-6737	Normal	LUSC	0.912037
TCGA-34-7107	Tumor	LUSC	2.1113
TCGA-34-7107	Normal	LUSC	0.623399
TCGA-34-8454	Tumor	LUSC	2.91823
TCGA-34-8454	Normal	LUSC	0.888305
TCGA-38-4625	Tumor	LUAD	2.31904
TCGA-38-4625	Normal	LUAD	0.836571
TCGA-38-4626	Tumor	LUAD	1.31944
TCGA-38-4626	Normal	LUAD	0.773996
TCGA-38-4627	Tumor	LUAD	1.48522
TCGA-38-4627	Normal	LUAD	0.799087
TCGA-38-4632	Tumor	LUAD	2.78935
TCGA-38-4632	Normal	LUAD	0.778965
TCGA-39-5040	Tumor	LUSC	2.21083
TCGA-39-5040	Normal	LUSC	0.443925
TCGA-43-5670	Tumor	LUSC	3.25152
TCGA-43-5670	Normal	LUSC	1.23002
TCGA-43-6143	Tumor	LUSC	3.81833
TCGA-43-6143	Normal	LUSC	0.652877
TCGA-43-6647	Tumor	LUSC	2.61285
TCGA-43-6647	Normal	LUSC	0.831634
TCGA-43-6771	Tumor	LUSC	3.953
TCGA-43-6771	Normal	LUSC	0.877823
TCGA-43-6773	Tumor	LUSC	2.60502
TCGA-43-6773	Normal	LUSC	0.593975
TCGA-43-7657	Tumor	LUSC	5.37791
TCGA-43-7657	Normal	LUSC	0.898866
TCGA-43-7658	Tumor	LUSC	4.59346
TCGA-43-7658	Normal	LUSC	0.835843
TCGA-44-2655	Tumor	LUAD	3.07149
TCGA-44-2655	Normal	LUAD	1.14789
TCGA-44-2657	Tumor	LUAD	1.69706
TCGA-44-2657	Normal	LUAD	1.23701
TCGA-44-2661	Tumor	LUAD	1.47301
TCGA-44-2661	Normal	LUAD	1.287
TCGA-44-2662	Tumor	LUAD	3.31195
TCGA-44-2662	Normal	LUAD	0.551787
TCGA-44-2665	Tumor	LUAD	3.06324
TCGA-44-2665	Normal	LUAD	0.801821
TCGA-44-2668	Tumor	LUAD	2.81141
TCGA-44-2668	Normal	LUAD	1.04201
TCGA-44-3396	Tumor	LUAD	2.00205
TCGA-44-3396	Normal	LUAD	0.833335
TCGA-44-3398	Tumor	LUAD	2.22743
TCGA-44-3398	Normal	LUAD	1.03879
TCGA-44-5645	Tumor	LUAD	1.84716
TCGA-44-5645	Normal	LUAD	1.2673
TCGA-44-6145	Tumor	LUAD	1.93206
TCGA-44-6145	Normal	LUAD	1.01078
TCGA-44-6146	Tumor	LUAD	2.06115
TCGA-44-6146	Normal	LUAD	1.12062
TCGA-44-6147	Tumor	LUAD	2.95754
TCGA-44-6147	Normal	LUAD	0.739243
TCGA-44-6148	Tumor	LUAD	1.22287
TCGA-44-6148	Normal	LUAD	1.02311
TCGA-44-6776	Tumor	LUAD	2.97741
TCGA-44-6776	Normal	LUAD	0.726657
TCGA-44-6777	Tumor	LUAD	2.87735
TCGA-44-6777	Normal	LUAD	0.97607
TCGA-44-6778	Tumor	LUAD	2.30247
TCGA-44-6778	Normal	LUAD	0.667847
TCGA-49-4490	Tumor	LUAD	4.47134
TCGA-49-4490	Normal	LUAD	0.890875
TCGA-49-4512	Tumor	LUAD	3.95916
TCGA-49-4512	Normal	LUAD	0.896466
TCGA-49-6742	Tumor	LUAD	4.48421
TCGA-49-6742	Normal	LUAD	1.17671
TCGA-49-6743	Tumor	LUAD	3.157
TCGA-49-6743	Normal	LUAD	0.835762
TCGA-49-6744	Tumor	LUAD	3.10816
TCGA-49-6744	Normal	LUAD	0.818932
TCGA-49-6745	Tumor	LUAD	1.3111
TCGA-49-6745	Normal	LUAD	1.25906
TCGA-49-6761	Tumor	LUAD	3.00635
TCGA-49-6761	Normal	LUAD	1.01621
TCGA-50-5930	Tumor	LUAD	4.49348
TCGA-50-5930	Normal	LUAD	1.42664
TCGA-50-5931	Tumor	LUAD	3.16832
TCGA-50-5931	Normal	LUAD	0.609093
TCGA-50-5932	Tumor	LUAD	2.81256
TCGA-50-5932	Normal	LUAD	1.03288
TCGA-50-5933	Tumor	LUAD	2.80976
TCGA-50-5933	Normal	LUAD	0.496104
TCGA-50-5935	Tumor	LUAD	3.84844
TCGA-50-5935	Normal	LUAD	1.15095
TCGA-50-5936	Tumor	LUAD	3.0204
TCGA-50-5936	Normal	LUAD	0.863859
TCGA-50-5939	Tumor	LUAD	2.30722
TCGA-50-5939	Normal	LUAD	1.03513
TCGA-50-6595	Tumor	LUAD	2.28072
TCGA-50-6595	Normal	LUAD	1.07485
TCGA-51-4079	Tumor	LUSC	3.99411
TCGA-51-4079	Normal	LUSC	0.541416
TCGA-51-4081	Tumor	LUSC	3.63502
TCGA-51-4081	Normal	LUSC	0.65361
TCGA-55-6968	Tumor	LUAD	2.04019
TCGA-55-6968	Normal	LUAD	1.0941
TCGA-55-6969	Tumor	LUAD	2.57628
TCGA-55-6969	Normal	LUAD	0.473112
TCGA-55-6970	Tumor	LUAD	3.39057
TCGA-55-6970	Normal	LUAD	0.972325
TCGA-55-6971	Tumor	LUAD	1.97453
TCGA-55-6971	Normal	LUAD	0.92964
TCGA-55-6972	Tumor	LUAD	2.529
TCGA-55-6972	Normal	LUAD	0.945982
TCGA-55-6975	Tumor	LUAD	3.86652
TCGA-55-6975	Normal	LUAD	0.586404
TCGA-55-6978	Tumor	LUAD	1.47856
TCGA-55-6978	Normal	LUAD	1.25417
TCGA-55-6979	Tumor	LUAD	2.4225
TCGA-55-6979	Normal	LUAD	0.819423
TCGA-55-6980	Tumor	LUAD	2.59316
TCGA-55-6980	Normal	LUAD	0.971074
TCGA-55-6981	Tumor	LUAD	2.20423
TCGA-55-6981	Normal	LUAD	1.07881
TCGA-55-6982	Tumor	LUAD	2.06416
TCGA-55-6982	Normal	LUAD	0.996172
TCGA-55-6983	Tumor	LUAD	2.18485
TCGA-55-6983	Normal	LUAD	0.329181
TCGA-55-6984	Tumor	LUAD	4.40725
TCGA-55-6984	Normal	LUAD	0.816886
TCGA-55-6985	Tumor	LUAD	3.11779
TCGA-55-6985	Normal	LUAD	0.807932
TCGA-55-6986	Tumor	LUAD	1.48743
TCGA-55-6986	Normal	LUAD	0.888772
TCGA-56-7222	Tumor	LUSC	2.66551
TCGA-56-7222	Normal	LUSC	0.818196
TCGA-56-7579	Tumor	LUSC	5.65254
TCGA-56-7579	Normal	LUSC	1.02347
TCGA-56-7580	Tumor	LUSC	4.17371
TCGA-56-7580	Normal	LUSC	1.31127
TCGA-56-7582	Tumor	LUSC	3.48486
TCGA-56-7582	Normal	LUSC	1.71141
TCGA-56-7730	Tumor	LUSC	4.33002
TCGA-56-7730	Normal	LUSC	1.06046
TCGA-56-7731	Tumor	LUSC	3.09295
TCGA-56-7731	Normal	LUSC	0.798175
TCGA-56-7823	Tumor	LUSC	3.80485
TCGA-56-7823	Normal	LUSC	0.694568
TCGA-56-8082	Tumor	LUSC	2.12327
TCGA-56-8082	Normal	LUSC	0.406428
TCGA-56-8083	Tumor	LUSC	4.77478
TCGA-56-8083	Normal	LUSC	0.719753
TCGA-56-8201	Tumor	LUSC	2.26864
TCGA-56-8201	Normal	LUSC	0.576087
TCGA-56-8309	Tumor	LUSC	2.14192
TCGA-56-8309	Normal	LUSC	0.772984
TCGA-56-8623	Tumor	LUSC	1.02935
TCGA-56-8623	Normal	LUSC	0.862511
TCGA-58-8386	Tumor	LUSC	4.02223
TCGA-58-8386	Normal	LUSC	0.951289
TCGA-60-2709	Tumor	LUSC	2.34959
TCGA-60-2709	Normal	LUSC	0.876173
TCGA-73-4676	Tumor	LUAD	3.82445
TCGA-73-4676	Normal	LUAD	0.70115
TCGA-77-7138	Tumor	LUSC	3.53139
TCGA-77-7138	Normal	LUSC	1.28274
TCGA-77-7142	Tumor	LUSC	2.61157
TCGA-77-7142	Normal	LUSC	0.863701
TCGA-77-7335	Tumor	LUSC	3.09489
TCGA-77-7335	Normal	LUSC	0.622087
TCGA-77-7337	Tumor	LUSC	3.54535
TCGA-77-7337	Normal	LUSC	0.785258
TCGA-77-7338	Tumor	LUSC	4.67368
TCGA-77-7338	Normal	LUSC	1.04075
TCGA-77-8007	Tumor	LUSC	3.89374
TCGA-77-8007	Normal	LUSC	0.958731
TCGA-77-8008	Tumor	LUSC	3.80453
TCGA-77-8008	Normal	LUSC	1.32014
TCGA-85-7710	Tumor	LUSC	4.03576
TCGA-85-7710	Normal	LUSC	1.19931
TCGA-90-6837	Tumor	LUSC	4.02712
TCGA-90-6837	Normal	LUSC	1.26957
TCGA-90-7767	Tumor	LUSC	3.28283
TCGA-90-7767	Normal	LUSC	0.643579
TCGA-91-6828	Tumor	LUAD	1.14666
TCGA-91-6828	Normal	LUAD	0.797843
TCGA-91-6829	Tumor	LUAD	2.79029
TCGA-91-6829	Normal	LUAD	1.00705
TCGA-91-6831	Tumor	LUAD	2.40286
TCGA-91-6831	Normal	LUAD	0.344374
TCGA-91-6835	Tumor	LUAD	2.91852
TCGA-91-6835	Normal	LUAD	1.24811
TCGA-91-6836	Tumor	LUAD	4.91985
TCGA-91-6836	Normal	LUAD	0.756169
TCGA-91-6847	Tumor	LUAD	2.63155
TCGA-91-6847	Normal	LUAD	0.881038
TCGA-91-6849	Tumor	LUAD	2.50957
TCGA-91-6849	Normal	LUAD	0.915406
TCGA-92-7340	Tumor	LUSC	3.10973
TCGA-92-7340	Normal	LUSC	0.603692
TCGA-A3-3358	Tumor	KIRC	1.7233
TCGA-A3-3358	Normal	KIRC	0.507516
TCGA-A3-3387	Tumor	KIRC	2.59763
TCGA-A3-3387	Normal	KIRC	0.691623
TCGA-A4-A4ZT	Tumor	KIRP	1.84663
TCGA-A4-A4ZT	Normal	KIRP	1.1173
TCGA-A4-A57E	Tumor	KIRP	2.114
TCGA-A4-A57E	Normal	KIRP	1.01963
TCGA-A6-2671	Tumor	COAD	5.58538
TCGA-A6-2671	Normal	COAD	3.29331
TCGA-A6-2675	Tumor	COAD	4.08821
TCGA-A6-2675	Normal	COAD	2.24601
TCGA-A6-2678	Tumor	COAD	4.43747
TCGA-A6-2678	Normal	COAD	2.91018
TCGA-A6-2679	Tumor	COAD	3.5211
TCGA-A6-2679	Normal	COAD	2.14897
TCGA-A6-2680	Tumor	COAD	6.15159
TCGA-A6-2680	Normal	COAD	2.23967
TCGA-A6-2682	Tumor	COAD	3.92738
TCGA-A6-2682	Normal	COAD	2.55257
TCGA-A6-2683	Tumor	COAD	4.25942
TCGA-A6-2683	Normal	COAD	3.67002
TCGA-A6-2684	Tumor	COAD	4.64238
TCGA-A6-2684	Normal	COAD	2.81318
TCGA-A6-2685	Tumor	COAD	4.8372
TCGA-A6-2685	Normal	COAD	3.03034
TCGA-A6-2686	Tumor	COAD	3.39229
TCGA-A6-2686	Normal	COAD	2.91328
TCGA-A6-5659	Tumor	COAD	4.23412
TCGA-A6-5659	Normal	COAD	2.32481
TCGA-A6-5662	Tumor	COAD	5.97763
TCGA-A6-5662	Normal	COAD	2.34452
TCGA-A6-5665	Tumor	COAD	4.69223
TCGA-A6-5665	Normal	COAD	2.50075
TCGA-A6-5667	Tumor	COAD	3.36933
TCGA-A6-5667	Normal	COAD	2.94576
TCGA-A7-A0CE	Tumor	BRCA	4.72996
TCGA-A7-A0CE	Normal	BRCA	3.4702
TCGA-A7-A0CH	Tumor	BRCA	5.93101
TCGA-A7-A0CH	Normal	BRCA	3.25478
TCGA-A7-A0D9	Tumor	BRCA	1.94912
TCGA-A7-A0D9	Normal	BRCA	1.0418
TCGA-A7-A0DB	Tumor	BRCA	5.42524
TCGA-A7-A0DB	Normal	BRCA	1.23407
TCGA-A7-A0DC	Tumor	BRCA	0.566084
TCGA-A7-A0DC	Normal	BRCA	1.81553
TCGA-A7-A13E	Tumor	BRCA	6.44066
TCGA-A7-A13E	Normal	BRCA	1.84647
TCGA-A7-A13F	Tumor	BRCA	1.98997
TCGA-A7-A13F	Normal	BRCA	2.46148
TCGA-A7-A13G	Tumor	BRCA	3.99706
TCGA-A7-A13G	Normal	BRCA	0.572211
TCGA-AA-3489	Tumor	COAD	4.45615
TCGA-AA-3489	Normal	COAD	3.62556
TCGA-AA-3496	Tumor	COAD	5.11853
TCGA-AA-3496	Normal	COAD	1.93765
TCGA-AA-3511	Tumor	COAD	4.2541
TCGA-AA-3511	Normal	COAD	3.23976
TCGA-AA-3514	Tumor	COAD	2.60737
TCGA-AA-3514	Normal	COAD	1.9517
TCGA-AA-3516	Tumor	COAD	4.6607
TCGA-AA-3516	Normal	COAD	3.20792
TCGA-AA-3517	Tumor	COAD	3.94217
TCGA-AA-3517	Normal	COAD	2.44544
TCGA-AA-3518	Tumor	COAD	5.15651
TCGA-AA-3518	Normal	COAD	3.0579
TCGA-AA-3520	Tumor	COAD	3.7597
TCGA-AA-3520	Normal	COAD	2.9583
TCGA-AA-3522	Tumor	COAD	4.10468
TCGA-AA-3522	Normal	COAD	3.0285
TCGA-AA-3525	Tumor	COAD	4.84406
TCGA-AA-3525	Normal	COAD	1.65933
TCGA-AA-3527	Tumor	COAD	4.62532
TCGA-AA-3527	Normal	COAD	2.68849
TCGA-AA-3531	Tumor	COAD	2.96403
TCGA-AA-3531	Normal	COAD	2.58369
TCGA-AA-3534	Tumor	COAD	4.47053
TCGA-AA-3534	Normal	COAD	2.76952
TCGA-AA-3655	Tumor	COAD	5.08528
TCGA-AA-3655	Normal	COAD	3.41481
TCGA-AA-3660	Tumor	COAD	4.6514
TCGA-AA-3660	Normal	COAD	3.56539
TCGA-AA-3662	Tumor	COAD	4.48162
TCGA-AA-3662	Normal	COAD	4.18966
TCGA-AA-3663	Tumor	COAD	4.1447
TCGA-AA-3663	Normal	COAD	1.96979
TCGA-AA-3697	Tumor	COAD	4.34533
TCGA-AA-3697	Normal	COAD	2.72957
TCGA-AA-3712	Tumor	COAD	4.25697
TCGA-AA-3712	Normal	COAD	3.28367
TCGA-AA-3713	Tumor	COAD	4.17923
TCGA-AA-3713	Normal	COAD	1.52977
TCGA-AC-A23H	Tumor	BRCA	5.05649
TCGA-AC-A23H	Normal	BRCA	2.42444
TCGA-AC-A2FB	Tumor	BRCA	3.70023
TCGA-AC-A2FB	Normal	BRCA	2.68221
TCGA-AC-A2FF	Tumor	BRCA	2.93319
TCGA-AC-A2FF	Normal	BRCA	3.55971
TCGA-AC-A2FM	Tumor	BRCA	2.10953
TCGA-AC-A2FM	Normal	BRCA	3.39977
TCGA-AF-2691	Tumor	READ	4.5335
TCGA-AF-2691	Normal	READ	3.22625
TCGA-AF-2692	Tumor	READ	5.00942
TCGA-AF-2692	Normal	READ	2.75378
TCGA-AF-3400	Tumor	READ	3.9797
TCGA-AF-3400	Normal	READ	4.14339
TCGA-AF-5654	Tumor	READ	3.45574
TCGA-AF-5654	Normal	READ	3.4894
TCGA-AG-3725	Tumor	READ	6.58448
TCGA-AG-3725	Normal	READ	3.34666
TCGA-AG-3731	Tumor	READ	2.83092
TCGA-AG-3731	Normal	READ	3.95342
TCGA-AG-3732	Tumor	READ	5.56236
TCGA-AG-3732	Normal	READ	2.9406
TCGA-AG-3742	Tumor	READ	5.47138
TCGA-AG-3742	Normal	READ	3.30053
TCGA-AH-6643	Tumor	READ	6.35221
TCGA-AH-6643	Normal	READ	2.60317
TCGA-AJ-A2QL	Tumor	UCEC	2.13238
TCGA-AJ-A2QL	Normal	UCEC	2.1032
TCGA-AJ-A3NC	Tumor	UCEC	3.97531
TCGA-AJ-A3NC	Normal	UCEC	1.47959
TCGA-AJ-A3NE	Tumor	UCEC	4.72132
TCGA-AJ-A3NE	Normal	UCEC	1.48707
TCGA-AJ-A3NH	Tumor	UCEC	4.62338
TCGA-AJ-A3NH	Normal	UCEC	1.72574
TCGA-AX-A05Y	Tumor	UCEC	6.48395
TCGA-AX-A05Y	Normal	UCEC	2.1653
TCGA-AX-A0IZ	Tumor	UCEC	4.24464
TCGA-AX-A0IZ	Normal	UCEC	1.28676
TCGA-AX-A0J0	Tumor	UCEC	4.31957
TCGA-AX-A0J0	Normal	UCEC	2.20486
TCGA-AX-A1CF	Tumor	UCEC	3.07878
TCGA-AX-A1CF	Normal	UCEC	1.54077
TCGA-AX-A1CI	Tumor	UCEC	3.69352
TCGA-AX-A1CI	Normal	UCEC	1.84784
TCGA-AX-A1CK	Tumor	UCEC	3.66307
TCGA-AX-A1CK	Normal	UCEC	1.54394
TCGA-AX-A2H8	Tumor	UCEC	3.60318
TCGA-AX-A2H8	Normal	UCEC	1.94591
TCGA-AX-A2HA	Tumor	UCEC	3.74629
TCGA-AX-A2HA	Normal	UCEC	1.54646
TCGA-AX-A2HC	Tumor	UCEC	3.01228
TCGA-AX-A2HC	Normal	UCEC	1.46879
TCGA-AX-A2HD	Tumor	UCEC	5.41742
TCGA-AX-A2HD	Normal	UCEC	2.07423
TCGA-AZ-6598	Tumor	COAD	4.71849
TCGA-AZ-6598	Normal	COAD	2.1162
TCGA-AZ-6599	Tumor	COAD	5.0157
TCGA-AZ-6599	Normal	COAD	2.65352
TCGA-AZ-6600	Tumor	COAD	4.81612
TCGA-AZ-6600	Normal	COAD	2.29757
TCGA-AZ-6601	Tumor	COAD	4.62331
TCGA-AZ-6601	Normal	COAD	3.33245
TCGA-AZ-6603	Tumor	COAD	4.83796
TCGA-AZ-6603	Normal	COAD	3.34325
TCGA-AZ-6605	Tumor	COAD	3.71802
TCGA-AZ-6605	Normal	COAD	1.17817
TCGA-B0-4700	Tumor	KIRC	3.37311
TCGA-B0-4700	Normal	KIRC	0.397584
TCGA-B0-4712	Tumor	KIRC	3.08561
TCGA-B0-4712	Normal	KIRC	0.989575
TCGA-B0-5402	Tumor	KIRC	2.51717
TCGA-B0-5402	Normal	KIRC	0.654527
TCGA-B0-5690	Tumor	KIRC	2.93597
TCGA-B0-5690	Normal	KIRC	0.666666
TCGA-B0-5691	Tumor	KIRC	2.53705
TCGA-B0-5691	Normal	KIRC	0.751464
TCGA-B0-5694	Tumor	KIRC	3.71633
TCGA-B0-5694	Normal	KIRC	1.02758
TCGA-B0-5696	Tumor	KIRC	2.97953
TCGA-B0-5696	Normal	KIRC	0.589188
TCGA-B0-5697	Tumor	KIRC	1.92539
TCGA-B0-5697	Normal	KIRC	0.389236
TCGA-B0-5699	Tumor	KIRC	2.52887
TCGA-B0-5699	Normal	KIRC	0.565012
TCGA-B0-5701	Tumor	KIRC	2.32818
TCGA-B0-5701	Normal	KIRC	0.7433
TCGA-B0-5703	Tumor	KIRC	2.08444
TCGA-B0-5703	Normal	KIRC	1.04754
TCGA-B0-5705	Tumor	KIRC	1.81967
TCGA-B0-5705	Normal	KIRC	0.686164
TCGA-B0-5706	Tumor	KIRC	2.34976
TCGA-B0-5706	Normal	KIRC	0.918997
TCGA-B0-5709	Tumor	KIRC	1.62518
TCGA-B0-5709	Normal	KIRC	0.689478
TCGA-B0-5711	Tumor	KIRC	2.67471
TCGA-B0-5711	Normal	KIRC	0.875387
TCGA-B0-5712	Tumor	KIRC	2.79491
TCGA-B0-5712	Normal	KIRC	0.904195
TCGA-B2-5636	Tumor	KIRC	3.14918
TCGA-B2-5636	Normal	KIRC	0.599508
TCGA-B2-5641	Tumor	KIRC	2.02237
TCGA-B2-5641	Normal	KIRC	1.35282
TCGA-B8-4619	Tumor	KIRC	0.316493
TCGA-B8-4619	Normal	KIRC	0.41684
TCGA-B8-4620	Tumor	KIRC	3.84228
TCGA-B8-4620	Normal	KIRC	0.898479
TCGA-B8-4622	Tumor	KIRC	2.78791
TCGA-B8-4622	Normal	KIRC	0.612871
TCGA-B8-5549	Tumor	KIRC	2.26897
TCGA-B8-5549	Normal	KIRC	1.2458
TCGA-B8-5552	Tumor	KIRC	2.15533
TCGA-B8-5552	Normal	KIRC	1.18269
TCGA-B9-4115	Tumor	KIRP	2.54189
TCGA-B9-4115	Normal	KIRP	0.742696
TCGA-BC-A10Q	Tumor	LIHC	3.17013
TCGA-BC-A10Q	Normal	LIHC	0.326537
TCGA-BC-A10R	Tumor	LIHC	1.49983
TCGA-BC-A10R	Normal	LIHC	1.05165
TCGA-BC-A10T	Tumor	LIHC	1.46728
TCGA-BC-A10T	Normal	LIHC	0.389347
TCGA-BC-A10U	Tumor	LIHC	2.892
TCGA-BC-A10U	Normal	LIHC	0.474462
TCGA-BC-A10W	Tumor	LIHC	3.38138
TCGA-BC-A10W	Normal	LIHC	0.395063
TCGA-BC-A10X	Tumor	LIHC	0.962364
TCGA-BC-A10X	Normal	LIHC	0.373954
TCGA-BC-A10Y	Tumor	LIHC	1.35958
TCGA-BC-A10Y	Normal	LIHC	0.636265
TCGA-BC-A10Z	Tumor	LIHC	1.29196
TCGA-BC-A10Z	Normal	LIHC	0.826762
TCGA-BC-A110	Tumor	LIHC	0.77543
TCGA-BC-A110	Normal	LIHC	0.204391
TCGA-BC-A216	Tumor	LIHC	2.88235
TCGA-BC-A216	Normal	LIHC	0.683292
TCGA-BD-A2L6	Tumor	LIHC	0.792939
TCGA-BD-A2L6	Normal	LIHC	0.439783
TCGA-BD-A3EP	Tumor	LIHC	1.00935
TCGA-BD-A3EP	Normal	LIHC	0.326537
TCGA-BG-A2AD	Tumor	UCEC	2.9913
TCGA-BG-A2AD	Normal	UCEC	1.9003
TCGA-BG-A3EW	Tumor	UCEC	3.24045
TCGA-BG-A3EW	Normal	UCEC	1.56935
TCGA-BG-A3PP	Tumor	UCEC	6.47933
TCGA-BG-A3PP	Normal	UCEC	1.81238
TCGA-BH-A0AU	Tumor	BRCA	3.27322
TCGA-BH-A0AU	Normal	BRCA	3.58157
TCGA-BH-A0AY	Tumor	BRCA	5.54059
TCGA-BH-A0AY	Normal	BRCA	2.82985
TCGA-BH-A0AZ	Tumor	BRCA	4.45549
TCGA-BH-A0AZ	Normal	BRCA	3.25533
TCGA-BH-A0B3	Tumor	BRCA	5.04284
TCGA-BH-A0B3	Normal	BRCA	3.04691
TCGA-BH-A0B5	Tumor	BRCA	3.3269
TCGA-BH-A0B5	Normal	BRCA	0.54587
TCGA-BH-A0B7	Tumor	BRCA	5.88668
TCGA-BH-A0B7	Normal	BRCA	3.44951
TCGA-BH-A0B8	Tumor	BRCA	2.98446
TCGA-BH-A0B8	Normal	BRCA	1.03012
TCGA-BH-A0BA	Tumor	BRCA	5.82313
TCGA-BH-A0BA	Normal	BRCA	2.9035
TCGA-BH-A0BC	Tumor	BRCA	3.49417
TCGA-BH-A0BC	Normal	BRCA	3.1102
TCGA-BH-A0BJ	Tumor	BRCA	3.55097
TCGA-BH-A0BJ	Normal	BRCA	3.8218
TCGA-BH-A0BM	Tumor	BRCA	4.78642
TCGA-BH-A0BM	Normal	BRCA	3.66627
TCGA-BH-A0BQ	Tumor	BRCA	4.25488
TCGA-BH-A0BQ	Normal	BRCA	3.01564
TCGA-BH-A0BS	Tumor	BRCA	4.13189
TCGA-BH-A0BS	Normal	BRCA	4.02271
TCGA-BH-A0BT	Tumor	BRCA	6.60676
TCGA-BH-A0BT	Normal	BRCA	3.84437
TCGA-BH-A0BV	Tumor	BRCA	2.79019
TCGA-BH-A0BV	Normal	BRCA	3.85236
TCGA-BH-A0BW	Tumor	BRCA	3.37905
TCGA-BH-A0BW	Normal	BRCA	2.90225
TCGA-BH-A0BZ	Tumor	BRCA	3.83547
TCGA-BH-A0BZ	Normal	BRCA	2.2964
TCGA-BH-A0C0	Tumor	BRCA	4.4273
TCGA-BH-A0C0	Normal	BRCA	3.67998
TCGA-BH-A0C3	Tumor	BRCA	5.71006
TCGA-BH-A0C3	Normal	BRCA	3.55192
TCGA-BH-A0DD	Tumor	BRCA	3.17758
TCGA-BH-A0DD	Normal	BRCA	1.15704
TCGA-BH-A0DG	Tumor	BRCA	2.57333
TCGA-BH-A0DG	Normal	BRCA	3.33805
TCGA-BH-A0DH	Tumor	BRCA	2.22333
TCGA-BH-A0DH	Normal	BRCA	2.59079
TCGA-BH-A0DK	Tumor	BRCA	2.28871
TCGA-BH-A0DK	Normal	BRCA	4.15896
TCGA-BH-A0DL	Tumor	BRCA	6.41273
TCGA-BH-A0DL	Normal	BRCA	2.69937
TCGA-BH-A0DO	Tumor	BRCA	4.34838
TCGA-BH-A0DO	Normal	BRCA	3.80463
TCGA-BH-A0DP	Tumor	BRCA	3.69714
TCGA-BH-A0DP	Normal	BRCA	3.18857
TCGA-BH-A0DQ	Tumor	BRCA	3.88808
TCGA-BH-A0DQ	Normal	BRCA	3.05911
TCGA-BH-A0DT	Tumor	BRCA	4.70127
TCGA-BH-A0DT	Normal	BRCA	3.38721
TCGA-BH-A0DV	Tumor	BRCA	4.21271
TCGA-BH-A0DV	Normal	BRCA	2.83772
TCGA-BH-A0DZ	Tumor	BRCA	4.25324
TCGA-BH-A0DZ	Normal	BRCA	3.6186
TCGA-BH-A0E0	Tumor	BRCA	7.04593
TCGA-BH-A0E0	Normal	BRCA	3.58392
TCGA-BH-A0E1	Tumor	BRCA	2.95973
TCGA-BH-A0E1	Normal	BRCA	3.72018
TCGA-BH-A0H5	Tumor	BRCA	2.62866
TCGA-BH-A0H5	Normal	BRCA	3.33246
TCGA-BH-A0H7	Tumor	BRCA	5.84608
TCGA-BH-A0H7	Normal	BRCA	4.91699
TCGA-BH-A0H9	Tumor	BRCA	3.47136
TCGA-BH-A0H9	Normal	BRCA	2.06423
TCGA-BH-A0HA	Tumor	BRCA	5.20001
TCGA-BH-A0HA	Normal	BRCA	3.76093
TCGA-BH-A0HK	Tumor	BRCA	2.17441
TCGA-BH-A0HK	Normal	BRCA	2.68578
TCGA-BH-A18J	Tumor	BRCA	5.48931
TCGA-BH-A18J	Normal	BRCA	2.72148
TCGA-BH-A18K	Tumor	BRCA	5.79821
TCGA-BH-A18K	Normal	BRCA	2.8481
TCGA-BH-A18L	Tumor	BRCA	2.99753
TCGA-BH-A18L	Normal	BRCA	2.94375
TCGA-BH-A18M	Tumor	BRCA	3.29987
TCGA-BH-A18M	Normal	BRCA	2.58907
TCGA-BH-A18N	Tumor	BRCA	2.53568
TCGA-BH-A18N	Normal	BRCA	2.52185
TCGA-BH-A18P	Tumor	BRCA	1.82554
TCGA-BH-A18P	Normal	BRCA	1.9125
TCGA-BH-A18Q	Tumor	BRCA	5.37459
TCGA-BH-A18Q	Normal	BRCA	2.90487
TCGA-BH-A18R	Tumor	BRCA	3.93693
TCGA-BH-A18R	Normal	BRCA	2.96776
TCGA-BH-A18S	Tumor	BRCA	5.50396
TCGA-BH-A18S	Normal	BRCA	2.40545
TCGA-BH-A18U	Tumor	BRCA	4.77687
TCGA-BH-A18U	Normal	BRCA	3.48059
TCGA-BH-A18V	Tumor	BRCA	5.24161
TCGA-BH-A18V	Normal	BRCA	3.89829
TCGA-BH-A1EN	Tumor	BRCA	3.85565
TCGA-BH-A1EN	Normal	BRCA	2.16334
TCGA-BH-A1EO	Tumor	BRCA	2.26604
TCGA-BH-A1EO	Normal	BRCA	1.58169
TCGA-BH-A1ET	Tumor	BRCA	4.98165
TCGA-BH-A1ET	Normal	BRCA	2.98472
TCGA-BH-A1EU	Tumor	BRCA	2.72851
TCGA-BH-A1EU	Normal	BRCA	2.37265
TCGA-BH-A1EV	Tumor	BRCA	6.42026
TCGA-BH-A1EV	Normal	BRCA	2.81813
TCGA-BH-A1EW	Tumor	BRCA	3.25214
TCGA-BH-A1EW	Normal	BRCA	3.33385
TCGA-BH-A1F0	Tumor	BRCA	3.87261
TCGA-BH-A1F0	Normal	BRCA	2.0943
TCGA-BH-A1F2	Tumor	BRCA	2.79169
TCGA-BH-A1F2	Normal	BRCA	1.61758
TCGA-BH-A1F6	Tumor	BRCA	4.4028
TCGA-BH-A1F6	Normal	BRCA	1.86782
TCGA-BH-A1F8	Tumor	BRCA	2.29704
TCGA-BH-A1F8	Normal	BRCA	2.91527
TCGA-BH-A1FB	Tumor	BRCA	3.25876
TCGA-BH-A1FB	Normal	BRCA	3.36237
TCGA-BH-A1FC	Tumor	BRCA	4.39966
TCGA-BH-A1FC	Normal	BRCA	3.06481
TCGA-BH-A1FD	Tumor	BRCA	4.0179
TCGA-BH-A1FD	Normal	BRCA	1.91648
TCGA-BH-A1FE	Tumor	BRCA	4.09736
TCGA-BH-A1FE	Normal	BRCA	2.51076
TCGA-BH-A1FG	Tumor	BRCA	4.17073
TCGA-BH-A1FG	Normal	BRCA	3.13609
TCGA-BH-A1FH	Tumor	BRCA	2.70361
TCGA-BH-A1FH	Normal	BRCA	2.63963
TCGA-BH-A1FJ	Tumor	BRCA	3.55582
TCGA-BH-A1FJ	Normal	BRCA	2.18935
TCGA-BH-A1FM	Tumor	BRCA	3.59646
TCGA-BH-A1FM	Normal	BRCA	2.41007
TCGA-BH-A1FN	Tumor	BRCA	5.36536
TCGA-BH-A1FN	Normal	BRCA	2.59577
TCGA-BH-A1FR	Tumor	BRCA	3.89998
TCGA-BH-A1FR	Normal	BRCA	3.30527
TCGA-BH-A1FU	Tumor	BRCA	4.7814
TCGA-BH-A1FU	Normal	BRCA	3.22061
TCGA-BH-A203	Tumor	BRCA	6.34001
TCGA-BH-A203	Normal	BRCA	2.69993
TCGA-BH-A204	Tumor	BRCA	2.25641
TCGA-BH-A204	Normal	BRCA	0.877352
TCGA-BH-A208	Tumor	BRCA	3.8994
TCGA-BH-A208	Normal	BRCA	3.29278
TCGA-BH-A209	Tumor	BRCA	3.71494
TCGA-BH-A209	Normal	BRCA	3.13919
TCGA-BJ-A28R	Tumor	THCA	1.778
TCGA-BJ-A28R	Normal	THCA	1.05665
TCGA-BJ-A28W	Tumor	THCA	1.67138
TCGA-BJ-A28W	Normal	THCA	1.66111
TCGA-BJ-A28X	Tumor	THCA	1.33965
TCGA-BJ-A28X	Normal	THCA	1.15283
TCGA-BJ-A290	Tumor	THCA	3.13803
TCGA-BJ-A290	Normal	THCA	1.31725
TCGA-BJ-A2N7	Tumor	THCA	1.95557
TCGA-BJ-A2N7	Normal	THCA	1.02255
TCGA-BJ-A2N8	Tumor	THCA	2.28827
TCGA-BJ-A2N8	Normal	THCA	2.04359
TCGA-BJ-A2N9	Tumor	THCA	1.6063
TCGA-BJ-A2N9	Normal	THCA	1.11962
TCGA-BJ-A2NA	Tumor	THCA	1.93259
TCGA-BJ-A2NA	Normal	THCA	1.74863
TCGA-BJ-A3PR	Tumor	THCA	1.68203
TCGA-BJ-A3PR	Normal	THCA	2.4703
TCGA-BJ-A3PU	Tumor	THCA	2.49088
TCGA-BJ-A3PU	Normal	THCA	2.11113
TCGA-BK-A0CB	Tumor	UCEC	4.40344
TCGA-BK-A0CB	Normal	UCEC	1.2294
TCGA-BK-A13C	Tumor	UCEC	4.91012
TCGA-BK-A13C	Normal	UCEC	1.08066
TCGA-BK-A4ZD	Tumor	UCEC	4.24958
TCGA-BK-A4ZD	Normal	UCEC	1.87782
TCGA-BL-A13J	Tumor	BLCA	5.07906
TCGA-BL-A13J	Normal	BLCA	0.483261
TCGA-BQ-5875	Tumor	KIRP	0.813607
TCGA-BQ-5875	Normal	KIRP	0.941106
TCGA-BQ-5877	Tumor	KIRP	1.79747
TCGA-BQ-5877	Normal	KIRP	0.505078
TCGA-BQ-5878	Tumor	KIRP	2.05426
TCGA-BQ-5878	Normal	KIRP	0.443501
TCGA-BQ-5879	Tumor	KIRP	2.22222
TCGA-BQ-5879	Normal	KIRP	0.40021
TCGA-BQ-5882	Tumor	KIRP	2.22561
TCGA-BQ-5882	Normal	KIRP	0.518233
TCGA-BQ-5884	Tumor	KIRP	1.64796
TCGA-BQ-5884	Normal	KIRP	0.479231
TCGA-BQ-5887	Tumor	KIRP	1.85376
TCGA-BQ-5887	Normal	KIRP	0.924784
TCGA-BQ-5888	Tumor	KIRP	2.02354
TCGA-BQ-5888	Normal	KIRP	1.42541
TCGA-BQ-5890	Tumor	KIRP	1.70399
TCGA-BQ-5890	Normal	KIRP	1.00195
TCGA-BQ-5891	Tumor	KIRP	2.37407
TCGA-BQ-5891	Normal	KIRP	0.524465
TCGA-BQ-5894	Tumor	KIRP	2.64032
TCGA-BQ-5894	Normal	KIRP	0.534261
TCGA-BQ-7044	Tumor	KIRP	1.77745
TCGA-BQ-7044	Normal	KIRP	1.06895
TCGA-BQ-7045	Tumor	KIRP	2.21447
TCGA-BQ-7045	Normal	KIRP	0.767231
TCGA-BQ-7046	Tumor	KIRP	1.7236
TCGA-BQ-7046	Normal	KIRP	0.731878
TCGA-BQ-7051	Tumor	KIRP	1.6596
TCGA-BQ-7051	Normal	KIRP	0.577441
TCGA-BQ-7055	Tumor	KIRP	0.363115
TCGA-BQ-7055	Normal	KIRP	0.646255
TCGA-BQ-7059	Tumor	KIRP	1.25114
TCGA-BQ-7059	Normal	KIRP	0.639695
TCGA-BQ-7061	Tumor	KIRP	1.27483
TCGA-BQ-7061	Normal	KIRP	1.73777
TCGA-BR-6453	Tumor	STAD	2.12519
TCGA-BR-6453	Normal	STAD	0.80925
TCGA-BR-6454	Tumor	STAD	1.59479
TCGA-BR-6454	Normal	STAD	1.03267
TCGA-BR-6457	Tumor	STAD	1.94666
TCGA-BR-6457	Normal	STAD	1.35727
TCGA-BR-6802	Tumor	STAD	5.29768
TCGA-BR-6802	Normal	STAD	0.825623
TCGA-BR-7704	Tumor	STAD	4.76341
TCGA-BR-7704	Normal	STAD	1.23628
TCGA-BR-7715	Tumor	STAD	2.84832
TCGA-BR-7715	Normal	STAD	1.08434
TCGA-BR-7716	Tumor	STAD	2.12876
TCGA-BR-7716	Normal	STAD	1.39133
TCGA-BR-7717	Tumor	STAD	3.98352
TCGA-BR-7717	Normal	STAD	1.04481
TCGA-BR-7851	Tumor	STAD	3.17209
TCGA-BR-7851	Normal	STAD	1.1155
TCGA-BR-8060	Tumor	STAD	1.64182
TCGA-BR-8060	Normal	STAD	0.683741
TCGA-BT-A20N	Tumor	BLCA	4.49786
TCGA-BT-A20N	Normal	BLCA	0.176067
TCGA-BT-A20Q	Tumor	BLCA	2.12327
TCGA-BT-A20Q	Normal	BLCA	0.403268
TCGA-BT-A20R	Tumor	BLCA	3.38598
TCGA-BT-A20R	Normal	BLCA	0.256044
TCGA-BT-A20U	Tumor	BLCA	4.05878
TCGA-BT-A20U	Normal	BLCA	4.30967
TCGA-BT-A20W	Tumor	BLCA	1.96155
TCGA-BT-A20W	Normal	BLCA	1.38858
TCGA-BT-A2LA	Tumor	BLCA	5.83227
TCGA-BT-A2LA	Normal	BLCA	1.65791
TCGA-BT-A2LB	Tumor	BLCA	2.60876
TCGA-BT-A2LB	Normal	BLCA	3.58413
TCGA-CG-5720	Tumor	STAD	1.93335
TCGA-CG-5720	Normal	STAD	1.11277
TCGA-CG-5721	Tumor	STAD	3.17079
TCGA-CG-5721	Normal	STAD	0.567545
TCGA-CG-5722	Tumor	STAD	1.23358
TCGA-CG-5722	Normal	STAD	1.42943
TCGA-CG-5734	Tumor	STAD	3.07313
TCGA-CG-5734	Normal	STAD	0.92524
TCGA-CH-5761	Tumor	PRAD	2.69499
TCGA-CH-5761	Normal	PRAD	2.58691
TCGA-CH-5767	Tumor	PRAD	1.33176
TCGA-CH-5767	Normal	PRAD	1.88671
TCGA-CH-5768	Tumor	PRAD	1.50559
TCGA-CH-5768	Normal	PRAD	2.7482
TCGA-CH-5769	Tumor	PRAD	1.87955
TCGA-CH-5769	Normal	PRAD	1.75762
TCGA-CJ-5672	Tumor	KIRC	2.22324
TCGA-CJ-5672	Normal	KIRC	0.858538
TCGA-CJ-5676	Tumor	KIRC	2.95884
TCGA-CJ-5676	Normal	KIRC	1.04019
TCGA-CJ-5677	Tumor	KIRC	3.04383
TCGA-CJ-5677	Normal	KIRC	0.618615
TCGA-CJ-5678	Tumor	KIRC	2.24699
TCGA-CJ-5678	Normal	KIRC	0.569783
TCGA-CJ-5679	Tumor	KIRC	4.26475
TCGA-CJ-5679	Normal	KIRC	0.83285
TCGA-CJ-5680	Tumor	KIRC	2.23076
TCGA-CJ-5680	Normal	KIRC	1.9742
TCGA-CJ-5681	Tumor	KIRC	4.525
TCGA-CJ-5681	Normal	KIRC	1.25991
TCGA-CJ-5689	Tumor	KIRC	2.56206
TCGA-CJ-5689	Normal	KIRC	1.48501
TCGA-CJ-6030	Tumor	KIRC	3.17407
TCGA-CJ-6030	Normal	KIRC	0.848718
TCGA-CJ-6033	Tumor	KIRC	3.78191
TCGA-CJ-6033	Normal	KIRC	1.264
TCGA-CU-A0YN	Tumor	BLCA	3.09495
TCGA-CU-A0YN	Normal	BLCA	1.18066
TCGA-CU-A0YR	Tumor	BLCA	1.65586
TCGA-CU-A0YR	Normal	BLCA	0.965396
TCGA-CV-6933	Tumor	HNSC	4.2096
TCGA-CV-6933	Normal	HNSC	1.29643
TCGA-CV-6934	Tumor	HNSC	3.90579
TCGA-CV-6934	Normal	HNSC	3.81308
TCGA-CV-6935	Tumor	HNSC	5.28537
TCGA-CV-6935	Normal	HNSC	4.45878
TCGA-CV-6936	Tumor	HNSC	3.38227
TCGA-CV-6936	Normal	HNSC	3.98749
TCGA-CV-6938	Tumor	HNSC	3.93602
TCGA-CV-6938	Normal	HNSC	5.51289
TCGA-CV-6939	Tumor	HNSC	2.86162
TCGA-CV-6939	Normal	HNSC	0.477988
TCGA-CV-6943	Tumor	HNSC	4.20806
TCGA-CV-6943	Normal	HNSC	4.7373
TCGA-CV-6955	Tumor	HNSC	3.95837
TCGA-CV-6955	Normal	HNSC	3.62912
TCGA-CV-6956	Tumor	HNSC	5.33374
TCGA-CV-6956	Normal	HNSC	4.20685
TCGA-CV-6959	Tumor	HNSC	2.5168
TCGA-CV-6959	Normal	HNSC	5.56709
TCGA-CV-6960	Tumor	HNSC	3.70003
TCGA-CV-6960	Normal	HNSC	5.08446
TCGA-CV-6961	Tumor	HNSC	3.55852
TCGA-CV-6961	Normal	HNSC	4.6454
TCGA-CV-6962	Tumor	HNSC	3.73778
TCGA-CV-6962	Normal	HNSC	4.25836
TCGA-CV-7091	Tumor	HNSC	4.2995
TCGA-CV-7091	Normal	HNSC	0.459851
TCGA-CV-7097	Tumor	HNSC	4.31643
TCGA-CV-7097	Normal	HNSC	0.846152
TCGA-CV-7101	Tumor	HNSC	3.77314
TCGA-CV-7101	Normal	HNSC	3.78304
TCGA-CV-7103	Tumor	HNSC	5.0485
TCGA-CV-7103	Normal	HNSC	4.81243
TCGA-CV-7177	Tumor	HNSC	4.54668
TCGA-CV-7177	Normal	HNSC	4.1878
TCGA-CV-7178	Tumor	HNSC	5.17681
TCGA-CV-7178	Normal	HNSC	5.09122
TCGA-CV-7183	Tumor	HNSC	5.53423
TCGA-CV-7183	Normal	HNSC	3.84538
TCGA-CV-7235	Tumor	HNSC	5.17749
TCGA-CV-7235	Normal	HNSC	1.7373
TCGA-CV-7238	Tumor	HNSC	3.74628
TCGA-CV-7238	Normal	HNSC	3.92651
TCGA-CV-7242	Tumor	HNSC	3.78917
TCGA-CV-7242	Normal	HNSC	4.24086
TCGA-CV-7245	Tumor	HNSC	3.20975
TCGA-CV-7245	Normal	HNSC	2.02878
TCGA-CV-7250	Tumor	HNSC	3.84961
TCGA-CV-7250	Normal	HNSC	3.39927
TCGA-CV-7252	Tumor	HNSC	3.38602
TCGA-CV-7252	Normal	HNSC	4.62277
TCGA-CV-7255	Tumor	HNSC	5.49108
TCGA-CV-7255	Normal	HNSC	2.79743
TCGA-CV-7261	Tumor	HNSC	5.15563
TCGA-CV-7261	Normal	HNSC	5.44606
TCGA-CV-7406	Tumor	HNSC	3.49146
TCGA-CV-7406	Normal	HNSC	2.33574
TCGA-CV-7416	Tumor	HNSC	3.53794
TCGA-CV-7416	Normal	HNSC	4.97693
TCGA-CV-7423	Tumor	HNSC	3.6826
TCGA-CV-7423	Normal	HNSC	4.73788
TCGA-CV-7424	Tumor	HNSC	3.88544
TCGA-CV-7424	Normal	HNSC	4.19876
TCGA-CV-7425	Tumor	HNSC	4.81646
TCGA-CV-7425	Normal	HNSC	5.12454
TCGA-CV-7432	Tumor	HNSC	3.30444
TCGA-CV-7432	Normal	HNSC	2.26858
TCGA-CV-7434	Tumor	HNSC	2.97258
TCGA-CV-7434	Normal	HNSC	2.35171
TCGA-CV-7437	Tumor	HNSC	4.61453
TCGA-CV-7437	Normal	HNSC	4.25644
TCGA-CV-7438	Tumor	HNSC	3.90228
TCGA-CV-7438	Normal	HNSC	4.66034
TCGA-CV-7440	Tumor	HNSC	2.97082
TCGA-CV-7440	Normal	HNSC	3.74202
TCGA-CW-5580	Tumor	KIRC	2.94763
TCGA-CW-5580	Normal	KIRC	0.878058
TCGA-CW-5581	Tumor	KIRC	2.53015
TCGA-CW-5581	Normal	KIRC	0.666757
TCGA-CW-5584	Tumor	KIRC	1.92284
TCGA-CW-5584	Normal	KIRC	1.13166
TCGA-CW-5585	Tumor	KIRC	2.6693
TCGA-CW-5585	Normal	KIRC	0.71563
TCGA-CW-5587	Tumor	KIRC	2.01225
TCGA-CW-5587	Normal	KIRC	0.691981
TCGA-CW-5589	Tumor	KIRC	3.05257
TCGA-CW-5589	Normal	KIRC	0.585924
TCGA-CW-5591	Tumor	KIRC	1.39045
TCGA-CW-5591	Normal	KIRC	3.47568
TCGA-CW-6087	Tumor	KIRC	0.93885
TCGA-CW-6087	Normal	KIRC	0.603217
TCGA-CW-6088	Tumor	KIRC	2.43944
TCGA-CW-6088	Normal	KIRC	1.25435
TCGA-CW-6090	Tumor	KIRC	4.07763
TCGA-CW-6090	Normal	KIRC	0.656634
TCGA-CZ-4863	Tumor	KIRC	1.90285
TCGA-CZ-4863	Normal	KIRC	1.40964
TCGA-CZ-4864	Tumor	KIRC	1.67532
TCGA-CZ-4864	Normal	KIRC	0.640158
TCGA-CZ-4865	Tumor	KIRC	2.67969
TCGA-CZ-4865	Normal	KIRC	1.40839
TCGA-CZ-5451	Tumor	KIRC	3.00342
TCGA-CZ-5451	Normal	KIRC	0.785341
TCGA-CZ-5452	Tumor	KIRC	2.03594
TCGA-CZ-5452	Normal	KIRC	1.19131
TCGA-CZ-5453	Tumor	KIRC	2.19714
TCGA-CZ-5453	Normal	KIRC	1.51571
TCGA-CZ-5454	Tumor	KIRC	4.24993
TCGA-CZ-5454	Normal	KIRC	1.35106
TCGA-CZ-5455	Tumor	KIRC	2.14698
TCGA-CZ-5455	Normal	KIRC	1.41975
TCGA-CZ-5456	Tumor	KIRC	2.80674
TCGA-CZ-5456	Normal	KIRC	1.28528
TCGA-CZ-5457	Tumor	KIRC	2.18403
TCGA-CZ-5457	Normal	KIRC	1.02041
TCGA-CZ-5458	Tumor	KIRC	2.85218
TCGA-CZ-5458	Normal	KIRC	1.07368
TCGA-CZ-5461	Tumor	KIRC	2.7019
TCGA-CZ-5461	Normal	KIRC	1.29455
TCGA-CZ-5462	Tumor	KIRC	2.55881
TCGA-CZ-5462	Normal	KIRC	1.23903
TCGA-CZ-5463	Tumor	KIRC	2.19431
TCGA-CZ-5463	Normal	KIRC	1.00331
TCGA-CZ-5465	Tumor	KIRC	3.10108
TCGA-CZ-5465	Normal	KIRC	0.834549
TCGA-CZ-5466	Tumor	KIRC	1.97907
TCGA-CZ-5466	Normal	KIRC	0.619836
TCGA-CZ-5467	Tumor	KIRC	2.36278
TCGA-CZ-5467	Normal	KIRC	0.862511
TCGA-CZ-5468	Tumor	KIRC	2.97026
TCGA-CZ-5468	Normal	KIRC	1.63534
TCGA-CZ-5469	Tumor	KIRC	4.11816
TCGA-CZ-5469	Normal	KIRC	1.13704
TCGA-CZ-5470	Tumor	KIRC	2.29455
TCGA-CZ-5470	Normal	KIRC	1.53993
TCGA-CZ-5982	Tumor	KIRC	2.05759
TCGA-CZ-5982	Normal	KIRC	0.680684
TCGA-CZ-5984	Tumor	KIRC	2.9338
TCGA-CZ-5984	Normal	KIRC	0.726221
TCGA-CZ-5985	Tumor	KIRC	2.44
TCGA-CZ-5985	Normal	KIRC	0.198997
TCGA-CZ-5986	Tumor	KIRC	3.05592
TCGA-CZ-5986	Normal	KIRC	0.685357
TCGA-CZ-5987	Tumor	KIRC	3.57881
TCGA-CZ-5987	Normal	KIRC	0.990519
TCGA-CZ-5988	Tumor	KIRC	3.47628
TCGA-CZ-5988	Normal	KIRC	0.456806
TCGA-CZ-5989	Tumor	KIRC	0.826355
TCGA-CZ-5989	Normal	KIRC	1.67595
TCGA-DD-A113	Tumor	LIHC	1.76905
TCGA-DD-A113	Normal	LIHC	0.331361
TCGA-DD-A114	Tumor	LIHC	1.53585
TCGA-DD-A114	Normal	LIHC	0.511367
TCGA-DD-A116	Tumor	LIHC	2.91518
TCGA-DD-A116	Normal	LIHC	0.610889
TCGA-DD-A118	Tumor	LIHC	0.9489
TCGA-DD-A118	Normal	LIHC	0.473423
TCGA-DD-A119	Tumor	LIHC	2.92839
TCGA-DD-A119	Normal	LIHC	0.778629
TCGA-DD-A11A	Tumor	LIHC	2.60782
TCGA-DD-A11A	Normal	LIHC	0.672199
TCGA-DD-A11B	Tumor	LIHC	0.303576
TCGA-DD-A11B	Normal	LIHC	0.408168
TCGA-DD-A11C	Tumor	LIHC	1.22749
TCGA-DD-A11C	Normal	LIHC	0.0756011
TCGA-DD-A11D	Tumor	LIHC	0.697952
TCGA-DD-A11D	Normal	LIHC	0.335712
TCGA-DD-A1EB	Tumor	LIHC	0.612022
TCGA-DD-A1EB	Normal	LIHC	0.386259
TCGA-DD-A1EC	Tumor	LIHC	1.0706
TCGA-DD-A1EC	Normal	LIHC	0.853117
TCGA-DD-A1EE	Tumor	LIHC	1.01913
TCGA-DD-A1EE	Normal	LIHC	0.762731
TCGA-DD-A1EG	Tumor	LIHC	1.43109
TCGA-DD-A1EG	Normal	LIHC	0.414027
TCGA-DD-A1EH	Tumor	LIHC	0.606821
TCGA-DD-A1EH	Normal	LIHC	0.368377
TCGA-DD-A1EI	Tumor	LIHC	0.76545
TCGA-DD-A1EI	Normal	LIHC	0.184852
TCGA-DD-A1EJ	Tumor	LIHC	4.28879
TCGA-DD-A1EJ	Normal	LIHC	0.886277
TCGA-DD-A1EL	Tumor	LIHC	1.57299
TCGA-DD-A1EL	Normal	LIHC	0.173127
TCGA-DD-A39V	Tumor	LIHC	2.15976
TCGA-DD-A39V	Normal	LIHC	0.310224
TCGA-DD-A39W	Tumor	LIHC	1.25029
TCGA-DD-A39W	Normal	LIHC	0.172359
TCGA-DD-A39X	Tumor	LIHC	3.71329
TCGA-DD-A39X	Normal	LIHC	0.676177
TCGA-DD-A39Z	Tumor	LIHC	1.58501
TCGA-DD-A39Z	Normal	LIHC	0.839395
TCGA-DD-A3A1	Tumor	LIHC	1.95639
TCGA-DD-A3A1	Normal	LIHC	1.09437
TCGA-DD-A3A2	Tumor	LIHC	0.436162
TCGA-DD-A3A2	Normal	LIHC	0.820077
TCGA-DD-A3A3	Tumor	LIHC	4.19285
TCGA-DD-A3A3	Normal	LIHC	0.14965
TCGA-DD-A3A4	Tumor	LIHC	0.42664
TCGA-DD-A3A4	Normal	LIHC	0.960438
TCGA-DD-A3A5	Tumor	LIHC	1.1553
TCGA-DD-A3A5	Normal	LIHC	0.402613
TCGA-DD-A3A6	Tumor	LIHC	1.71427
TCGA-DD-A3A6	Normal	LIHC	0.667665
TCGA-DD-A3A8	Tumor	LIHC	1.66598
TCGA-DD-A3A8	Normal	LIHC	0.160404
TCGA-DI-A2QU	Tumor	UCEC	2.44848
TCGA-DI-A2QU	Normal	UCEC	1.40599
TCGA-DI-A2QY	Tumor	UCEC	4.97358
TCGA-DI-A2QY	Normal	UCEC	1.66816
TCGA-DO-A1JZ	Tumor	THCA	2.18774
TCGA-DO-A1JZ	Normal	THCA	1.3003
TCGA-DZ-6131	Tumor	KIRP	1.97218
TCGA-DZ-6131	Normal	KIRP	0.888461
TCGA-DZ-6132	Tumor	KIRP	1.20895
TCGA-DZ-6132	Normal	KIRP	1.24531
TCGA-DZ-6133	Tumor	KIRP	1.39287
TCGA-DZ-6133	Normal	KIRP	0.682034
TCGA-DZ-6134	Tumor	KIRP	1.42202
TCGA-DZ-6134	Normal	KIRP	0.400101
TCGA-E2-A153	Tumor	BRCA	5.37133
TCGA-E2-A153	Normal	BRCA	3.64856
TCGA-E2-A158	Tumor	BRCA	6.46681
TCGA-E2-A158	Normal	BRCA	2.49001
TCGA-E2-A15I	Tumor	BRCA	4.57747
TCGA-E2-A15I	Normal	BRCA	1.38714
TCGA-E2-A15K	Tumor	BRCA	5.38078
TCGA-E2-A15K	Normal	BRCA	3.0788
TCGA-E2-A15M	Tumor	BRCA	3.49264
TCGA-E2-A15M	Normal	BRCA	2.37382
TCGA-E2-A1BC	Tumor	BRCA	5.5386
TCGA-E2-A1BC	Normal	BRCA	1.10044
TCGA-E2-A1IG	Tumor	BRCA	2.43859
TCGA-E2-A1IG	Normal	BRCA	2.04114
TCGA-E2-A1L7	Tumor	BRCA	2.99939
TCGA-E2-A1L7	Normal	BRCA	2.87986
TCGA-E2-A1LB	Tumor	BRCA	5.27637
TCGA-E2-A1LB	Normal	BRCA	4.4269
TCGA-E2-A1LH	Tumor	BRCA	4.71302
TCGA-E2-A1LH	Normal	BRCA	3.69182
TCGA-E2-A1LS	Tumor	BRCA	6.25997
TCGA-E2-A1LS	Normal	BRCA	1.39654
TCGA-E6-A1M0	Tumor	UCEC	3.81024
TCGA-E6-A1M0	Normal	UCEC	2.23692
TCGA-E8-A2JQ	Tumor	THCA	1.3825
TCGA-E8-A2JQ	Normal	THCA	1.35733
TCGA-E9-A1N4	Tumor	BRCA	2.12932
TCGA-E9-A1N4	Normal	BRCA	3.19249
TCGA-E9-A1N5	Tumor	BRCA	3.6028
TCGA-E9-A1N5	Normal	BRCA	3.88919
TCGA-E9-A1N6	Tumor	BRCA	6.11492
TCGA-E9-A1N6	Normal	BRCA	3.0984
TCGA-E9-A1N9	Tumor	BRCA	4.11317
TCGA-E9-A1N9	Normal	BRCA	3.31542
TCGA-E9-A1NA	Tumor	BRCA	4.08576
TCGA-E9-A1NA	Normal	BRCA	2.64113
TCGA-E9-A1ND	Tumor	BRCA	4.05229
TCGA-E9-A1ND	Normal	BRCA	2.88335
TCGA-E9-A1NF	Tumor	BRCA	6.11614
TCGA-E9-A1NF	Normal	BRCA	1.42083
TCGA-E9-A1NG	Tumor	BRCA	4.68338
TCGA-E9-A1NG	Normal	BRCA	1.94931
TCGA-E9-A1R7	Tumor	BRCA	3.29168
TCGA-E9-A1R7	Normal	BRCA	1.66507
TCGA-E9-A1RB	Tumor	BRCA	4.02288
TCGA-E9-A1RB	Normal	BRCA	2.38692
TCGA-E9-A1RC	Tumor	BRCA	5.68073
TCGA-E9-A1RC	Normal	BRCA	0.860049
TCGA-E9-A1RD	Tumor	BRCA	4.25114
TCGA-E9-A1RD	Normal	BRCA	2.01821
TCGA-E9-A1RF	Tumor	BRCA	3.28195
TCGA-E9-A1RF	Normal	BRCA	1.01328
TCGA-E9-A1RH	Tumor	BRCA	4.58088
TCGA-E9-A1RH	Normal	BRCA	1.34244
TCGA-E9-A1RI	Tumor	BRCA	3.22976
TCGA-E9-A1RI	Normal	BRCA	1.17881
TCGA-EJ-7115	Tumor	PRAD	1.40817
TCGA-EJ-7115	Normal	PRAD	2.34449
TCGA-EJ-7123	Tumor	PRAD	2.11036
TCGA-EJ-7123	Normal	PRAD	1.39934
TCGA-EJ-7125	Tumor	PRAD	4.21366
TCGA-EJ-7125	Normal	PRAD	2.54147
TCGA-EJ-7314	Tumor	PRAD	2.19629
TCGA-EJ-7314	Normal	PRAD	2.15853
TCGA-EJ-7315	Tumor	PRAD	3.40388
TCGA-EJ-7315	Normal	PRAD	2.51341
TCGA-EJ-7317	Tumor	PRAD	2.59789
TCGA-EJ-7317	Normal	PRAD	2.15248
TCGA-EJ-7321	Tumor	PRAD	1.62611
TCGA-EJ-7321	Normal	PRAD	2.47181
TCGA-EJ-7327	Tumor	PRAD	1.84571
TCGA-EJ-7327	Normal	PRAD	2.60348
TCGA-EJ-7328	Tumor	PRAD	2.3454
TCGA-EJ-7328	Normal	PRAD	2.09214
TCGA-EJ-7330	Tumor	PRAD	2.23487
TCGA-EJ-7330	Normal	PRAD	2.36205
TCGA-EJ-7331	Tumor	PRAD	2.2489
TCGA-EJ-7331	Normal	PRAD	2.58479
TCGA-EJ-7781	Tumor	PRAD	1.56706
TCGA-EJ-7781	Normal	PRAD	1.96114
TCGA-EJ-7782	Tumor	PRAD	2.46775
TCGA-EJ-7782	Normal	PRAD	2.60139
TCGA-EJ-7783	Tumor	PRAD	2.74237
TCGA-EJ-7783	Normal	PRAD	1.345
TCGA-EJ-7784	Tumor	PRAD	2.7041
TCGA-EJ-7784	Normal	PRAD	2.27793
TCGA-EJ-7785	Tumor	PRAD	1.68113
TCGA-EJ-7785	Normal	PRAD	2.66059
TCGA-EJ-7786	Tumor	PRAD	1.30147
TCGA-EJ-7786	Normal	PRAD	2.01689
TCGA-EJ-7789	Tumor	PRAD	4.2665
TCGA-EJ-7789	Normal	PRAD	2.43992
TCGA-EJ-7792	Tumor	PRAD	1.57328
TCGA-EJ-7792	Normal	PRAD	2.55425
TCGA-EJ-7793	Tumor	PRAD	1.77032
TCGA-EJ-7793	Normal	PRAD	2.15795
TCGA-EJ-7794	Tumor	PRAD	2.19853
TCGA-EJ-7794	Normal	PRAD	1.68787
TCGA-EJ-7797	Tumor	PRAD	1.9965
TCGA-EJ-7797	Normal	PRAD	2.91344
TCGA-EJ-A8FO	Tumor	PRAD	1.39682
TCGA-EJ-A8FO	Normal	PRAD	1.38902
TCGA-EL-A3GZ	Tumor	THCA	3.28125
TCGA-EL-A3GZ	Normal	THCA	1.74743
TCGA-EL-A3H1	Tumor	THCA	2.33683
TCGA-EL-A3H1	Normal	THCA	1.1551
TCGA-EL-A3H2	Tumor	THCA	1.54097
TCGA-EL-A3H2	Normal	THCA	1.66202
TCGA-EL-A3H7	Tumor	THCA	1.63455
TCGA-EL-A3H7	Normal	THCA	1.11763
TCGA-EL-A3MW	Tumor	THCA	3.10734
TCGA-EL-A3MW	Normal	THCA	1.64773
TCGA-EL-A3MX	Tumor	THCA	4.05868
TCGA-EL-A3MX	Normal	THCA	1.86758
TCGA-EL-A3MY	Tumor	THCA	1.87916
TCGA-EL-A3MY	Normal	THCA	1.20958
TCGA-EL-A3N2	Tumor	THCA	2.07502
TCGA-EL-A3N2	Normal	THCA	1.32728
TCGA-EL-A3N3	Tumor	THCA	1.48594
TCGA-EL-A3N3	Normal	THCA	1.47467
TCGA-EL-A3T0	Tumor	THCA	2.24221
TCGA-EL-A3T0	Normal	THCA	1.67211
TCGA-EL-A3T1	Tumor	THCA	1.23051
TCGA-EL-A3T1	Normal	THCA	1.06771
TCGA-EL-A3T2	Tumor	THCA	2.48695
TCGA-EL-A3T2	Normal	THCA	1.65095
TCGA-EL-A3T3	Tumor	THCA	2.03348
TCGA-EL-A3T3	Normal	THCA	1.51501
TCGA-EL-A3T6	Tumor	THCA	1.94313
TCGA-EL-A3T6	Normal	THCA	1.15432
TCGA-EL-A3T7	Tumor	THCA	2.05367
TCGA-EL-A3T7	Normal	THCA	1.32268
TCGA-EL-A3T8	Tumor	THCA	2.30845
TCGA-EL-A3T8	Normal	THCA	1.57386
TCGA-EL-A3TA	Tumor	THCA	2.53341
TCGA-EL-A3TA	Normal	THCA	1.6712
TCGA-EL-A3TB	Tumor	THCA	2.79523
TCGA-EL-A3TB	Normal	THCA	1.04285
TCGA-EL-A3ZG	Tumor	THCA	1.76655
TCGA-EL-A3ZG	Normal	THCA	1.56306
TCGA-EL-A3ZH	Tumor	THCA	1.27614
TCGA-EL-A3ZH	Normal	THCA	1.09741
TCGA-EL-A3ZK	Tumor	THCA	0.969749
TCGA-EL-A3ZK	Normal	THCA	1.01285
TCGA-EL-A3ZL	Tumor	THCA	2.28448
TCGA-EL-A3ZL	Normal	THCA	1.10118
TCGA-EL-A3ZM	Tumor	THCA	2.27995
TCGA-EL-A3ZM	Normal	THCA	1.07485
TCGA-EL-A3ZO	Tumor	THCA	2.52434
TCGA-EL-A3ZO	Normal	THCA	1.09956
TCGA-EL-A3ZP	Tumor	THCA	2.66726
TCGA-EL-A3ZP	Normal	THCA	1.09268
TCGA-EL-A3ZQ	Tumor	THCA	2.89128
TCGA-EL-A3ZQ	Normal	THCA	1.18066
TCGA-EL-A3ZR	Tumor	THCA	2.52785
TCGA-EL-A3ZR	Normal	THCA	1.22367
TCGA-EL-A3ZS	Tumor	THCA	2.33328
TCGA-EL-A3ZS	Normal	THCA	1.36031
TCGA-EL-A3ZT	Tumor	THCA	2.39471
TCGA-EL-A3ZT	Normal	THCA	0.90327
TCGA-EM-A1CS	Tumor	THCA	2.74349
TCGA-EM-A1CS	Normal	THCA	1.90731
TCGA-EM-A1CT	Tumor	THCA	1.40931
TCGA-EM-A1CT	Normal	THCA	1.38858
TCGA-EM-A1CU	Tumor	THCA	3.02668
TCGA-EM-A1CU	Normal	THCA	1.24007
TCGA-EM-A1CV	Tumor	THCA	2.67356
TCGA-EM-A1CV	Normal	THCA	1.82766
TCGA-EM-A1CW	Tumor	THCA	1.04285
TCGA-EM-A1CW	Normal	THCA	1.28635
TCGA-EM-A1YC	Tumor	THCA	0.625551
TCGA-EM-A1YC	Normal	THCA	2.2661
TCGA-EM-A3ST	Tumor	THCA	2.8132
TCGA-EM-A3ST	Normal	THCA	1.6653
TCGA-EP-A12J	Tumor	LIHC	1.21412
TCGA-EP-A12J	Normal	LIHC	0.215865
TCGA-EP-A26S	Tumor	LIHC	0.798756
TCGA-EP-A26S	Normal	LIHC	0.242938
TCGA-EP-A3RK	Tumor	LIHC	1.91667
TCGA-EP-A3RK	Normal	LIHC	0.381505
TCGA-ES-A2HT	Tumor	LIHC	1.28463
TCGA-ES-A2HT	Normal	LIHC	0.630778
TCGA-ET-A2MX	Tumor	THCA	1.20533
TCGA-ET-A2MX	Normal	THCA	2.00802
TCGA-ET-A2N5	Tumor	THCA	2.38874
TCGA-ET-A2N5	Normal	THCA	1.39632
TCGA-ET-A3DP	Tumor	THCA	2.24147
TCGA-ET-A3DP	Normal	THCA	1.20483
TCGA-ET-A3DW	Tumor	THCA	1.52837
TCGA-ET-A3DW	Normal	THCA	1.61979
TCGA-F4-6704	Tumor	COAD	3.90799
TCGA-F4-6704	Normal	COAD	3.31693
TCGA-FP-7735	Tumor	STAD	2.35617
TCGA-FP-7735	Normal	STAD	0.543892
TCGA-FP-7829	Tumor	STAD	3.95439
TCGA-FP-7829	Normal	STAD	1.97794
TCGA-FU-A3EO	Tumor	CESC	3.41316
TCGA-FU-A3EO	Normal	CESC	2.14052
TCGA-FV-A23B	Tumor	LIHC	0.977903
TCGA-FV-A23B	Normal	LIHC	0.455755
TCGA-FV-A2QR	Tumor	LIHC	0.833497
TCGA-FV-A2QR	Normal	LIHC	0.774924
TCGA-FV-A3I0	Tumor	LIHC	2.84615
TCGA-FV-A3I0	Normal	LIHC	0.329066
TCGA-FV-A3I1	Tumor	LIHC	1.59464
TCGA-FV-A3I1	Normal	LIHC	0.902884
TCGA-FV-A3R2	Tumor	LIHC	1.14333
TCGA-FV-A3R2	Normal	LIHC	0.67075
TCGA-FX-A2QS	Tumor	SARC	4.8886
TCGA-FX-A2QS	Normal	SARC	0.636543
TCGA-FY-A3TY	Tumor	THCA	1.42793
TCGA-FY-A3TY	Normal	THCA	1.53725
TCGA-G3-A3CH	Tumor	LIHC	1.75962
TCGA-G3-A3CH	Normal	LIHC	0.378955
TCGA-G9-6333	Tumor	PRAD	2.65814
TCGA-G9-6333	Normal	PRAD	2.91999
TCGA-G9-6342	Tumor	PRAD	2.49942
TCGA-G9-6342	Normal	PRAD	2.5624
TCGA-G9-6348	Tumor	PRAD	3.28475
TCGA-G9-6348	Normal	PRAD	3.14832
TCGA-G9-6351	Tumor	PRAD	2.20583
TCGA-G9-6351	Normal	PRAD	2.02354
TCGA-G9-6356	Tumor	PRAD	2.72513
TCGA-G9-6356	Normal	PRAD	2.47017
TCGA-G9-6362	Tumor	PRAD	2.7957
TCGA-G9-6362	Normal	PRAD	2.39545
TCGA-G9-6363	Tumor	PRAD	2.58542
TCGA-G9-6363	Normal	PRAD	1.83927
TCGA-G9-6365	Tumor	PRAD	2.49119
TCGA-G9-6365	Normal	PRAD	2.79749
TCGA-G9-6384	Tumor	PRAD	2.02301
TCGA-G9-6384	Normal	PRAD	2.20308
TCGA-G9-6496	Tumor	PRAD	3.8469
TCGA-G9-6496	Normal	PRAD	2.31565
TCGA-G9-6499	Tumor	PRAD	1.93806
TCGA-G9-6499	Normal	PRAD	3.46114
TCGA-GC-A3BM	Tumor	BLCA	2.2571
TCGA-GC-A3BM	Normal	BLCA	0.813525
TCGA-GC-A3WC	Tumor	BLCA	2.09623
TCGA-GC-A3WC	Normal	BLCA	1.22039
TCGA-GC-A6I3	Tumor	BLCA	2.80663
TCGA-GC-A6I3	Normal	BLCA	1.57027
TCGA-GD-A2C5	Tumor	BLCA	2.38234
TCGA-GD-A2C5	Normal	BLCA	1.97896
TCGA-GD-A3OP	Tumor	BLCA	1.93618
TCGA-GD-A3OP	Normal	BLCA	1.57739
TCGA-GD-A3OQ	Tumor	BLCA	1.81574
TCGA-GD-A3OQ	Normal	BLCA	1.00202
TCGA-GE-A2C6	Tumor	THCA	2.21977
TCGA-GE-A2C6	Normal	THCA	1.18827
TCGA-GI-A2C8	Tumor	BRCA	3.40088
TCGA-GI-A2C8	Normal	BRCA	0.215368
TCGA-GI-A2C9	Tumor	BRCA	3.6056
TCGA-GI-A2C9	Normal	BRCA	2.81785
TCGA-GL-6846	Tumor	KIRP	1.88943
TCGA-GL-6846	Normal	KIRP	0.59579
TCGA-GL-7966	Tumor	KIRP	2.83202
TCGA-GL-7966	Normal	KIRP	1.37912
TCGA-GL-A59R	Tumor	KIRP	1.57037
TCGA-GL-A59R	Normal	KIRP	0.693587
TCGA-GL-A9DE	Tumor	KIRP	0.616358
TCGA-GL-A9DE	Normal	KIRP	1.20708
TCGA-GN-A4U8	Tumor	SKCM	1.46237
TCGA-GN-A4U8	Normal	SKCM	1.19182
TCGA-H2-A2K9	Tumor	THCA	1.66353
TCGA-H2-A2K9	Normal	THCA	1.4453
TCGA-H2-A3RI	Tumor	THCA	2.20006
TCGA-H2-A3RI	Normal	THCA	1.12512
TCGA-H6-8124	Tumor	PAAD	2.75675
TCGA-H6-8124	Normal	PAAD	1.74321
TCGA-H6-A45N	Tumor	PAAD	2.73031
TCGA-H6-A45N	Normal	PAAD	1.16588
TCGA-H7-A6C4	Tumor	HNSC	5.15288
TCGA-H7-A6C4	Normal	HNSC	5.21894
TCGA-HC-7211	Tumor	PRAD	1.47706
TCGA-HC-7211	Normal	PRAD	1.36496
TCGA-HC-7737	Tumor	PRAD	0.899949
TCGA-HC-7737	Normal	PRAD	0.923035
TCGA-HC-7738	Tumor	PRAD	1.64224
TCGA-HC-7738	Normal	PRAD	0.852558
TCGA-HC-7740	Tumor	PRAD	1.53037
TCGA-HC-7740	Normal	PRAD	1.46822
TCGA-HC-7742	Tumor	PRAD	2.88825
TCGA-HC-7742	Normal	PRAD	1.94542
TCGA-HC-7745	Tumor	PRAD	1.76299
TCGA-HC-7745	Normal	PRAD	1.06688
TCGA-HC-7747	Tumor	PRAD	2.18285
TCGA-HC-7747	Normal	PRAD	0.916018
TCGA-HC-7752	Tumor	PRAD	1.29308
TCGA-HC-7752	Normal	PRAD	3.05615
TCGA-HC-7819	Tumor	PRAD	1.6658
TCGA-HC-7819	Normal	PRAD	2.57802
TCGA-HC-8258	Tumor	PRAD	1.76303
TCGA-HC-8258	Normal	PRAD	0.927972
TCGA-HC-8259	Tumor	PRAD	1.58511
TCGA-HC-8259	Normal	PRAD	2.8194
TCGA-HC-8260	Tumor	PRAD	1.88866
TCGA-HC-8260	Normal	PRAD	2.20777
TCGA-HC-8262	Tumor	PRAD	2.53082
TCGA-HC-8262	Normal	PRAD	2.47116
TCGA-HD-8635	Tumor	HNSC	2.92166
TCGA-HD-8635	Normal	HNSC	4.58102
TCGA-HD-A6HZ	Tumor	HNSC	3.57191
TCGA-HD-A6HZ	Normal	HNSC	4.57422
TCGA-HD-A6I0	Tumor	HNSC	4.77835
TCGA-HD-A6I0	Normal	HNSC	4.37744
TCGA-HM-A3JJ	Tumor	CESC	3.56432
TCGA-HM-A3JJ	Normal	CESC	1.56291
TCGA-HU-8238	Tumor	STAD	4.3014
TCGA-HU-8238	Normal	STAD	1.10856
TCGA-HU-A4GC	Tumor	STAD	1.40283
TCGA-HU-A4GC	Normal	STAD	0.275961
TCGA-HU-A4GH	Tumor	STAD	3.82553
TCGA-HU-A4GH	Normal	STAD	0.739589
TCGA-HU-A4GP	Tumor	STAD	2.62237
TCGA-HU-A4GP	Normal	STAD	0.389897
TCGA-HU-A4GY	Tumor	STAD	2.48176
TCGA-HU-A4GY	Normal	STAD	0.409038
TCGA-HU-A4HB	Tumor	STAD	1.61226
TCGA-HU-A4HB	Normal	STAD	0.278104
TCGA-HV-A5A3	Tumor	PAAD	4.59562
TCGA-HV-A5A3	Normal	PAAD	1.83544
TCGA-IC-A6RE	Tumor	ESCA	3.69491
TCGA-IC-A6RE	Normal	ESCA	4.80572
TCGA-IC-A6RF	Tumor	ESCA	5.8427
TCGA-IC-A6RF	Normal	ESCA	5.67123
TCGA-IN-7806	Tumor	STAD	4.87
TCGA-IN-7806	Normal	STAD	5.04381
TCGA-IN-8663	Tumor	STAD	2.1798
TCGA-IN-8663	Normal	STAD	4.07087
TCGA-IN-AB1V	Tumor	STAD	3.66176
TCGA-IN-AB1V	Normal	STAD	4.50955
TCGA-IN-AB1X	Tumor	STAD	4.71053
TCGA-IN-AB1X	Normal	STAD	4.46441
TCGA-IP-7968	Tumor	STAD	3.92436
TCGA-IP-7968	Normal	STAD	5.06614
TCGA-J4-A83J	Tumor	PRAD	1.66912
TCGA-J4-A83J	Normal	PRAD	1.93829
TCGA-K1-A3PO	Tumor	SARC	1.66389
TCGA-K1-A3PO	Normal	SARC	1.45491
TCGA-K4-A3WV	Tumor	BLCA	4.12708
TCGA-K4-A3WV	Normal	BLCA	1.50975
TCGA-K4-A54R	Tumor	BLCA	2.15598
TCGA-K4-A54R	Normal	BLCA	0.69893
TCGA-K4-A5RI	Tumor	BLCA	2.02414
TCGA-K4-A5RI	Normal	BLCA	1.30667
TCGA-KL-8324	Tumor	KICH	0.55218
TCGA-KL-8324	Normal	KICH	0.664665
TCGA-KL-8326	Tumor	KICH	0.127501
TCGA-KL-8326	Normal	KICH	0.71079
TCGA-KL-8329	Tumor	KICH	0.474462
TCGA-KL-8329	Normal	KICH	0.762987
TCGA-KL-8332	Tumor	KICH	0.677531
TCGA-KL-8332	Normal	KICH	0.506399
TCGA-KL-8336	Tumor	KICH	0.268434
TCGA-KL-8336	Normal	KICH	1.03012
TCGA-KL-8339	Tumor	KICH	0.330673
TCGA-KL-8339	Normal	KICH	0.646163
TCGA-KN-8419	Tumor	KICH	0.285343
TCGA-KN-8419	Normal	KICH	1.21425
TCGA-KN-8423	Tumor	KICH	0.617675
TCGA-KN-8423	Normal	KICH	1.68899
TCGA-KN-8424	Tumor	KICH	0.640158
TCGA-KN-8424	Normal	KICH	0.868529
TCGA-KN-8425	Tumor	KICH	0.453965
TCGA-KN-8425	Normal	KICH	1.23377
TCGA-KN-8426	Tumor	KICH	0.413811
TCGA-KN-8426	Normal	KICH	1.15969
TCGA-KN-8427	Tumor	KICH	1.3955
TCGA-KN-8427	Normal	KICH	1.32037
TCGA-KN-8428	Tumor	KICH	1.21611
TCGA-KN-8428	Normal	KICH	0.747173
TCGA-KN-8429	Tumor	KICH	0.521955
TCGA-KN-8429	Normal	KICH	1.28629
TCGA-KN-8430	Tumor	KICH	0.460271
TCGA-KN-8430	Normal	KICH	0.742265
TCGA-KN-8431	Tumor	KICH	0.478713
TCGA-KN-8431	Normal	KICH	1.36412
TCGA-KN-8432	Tumor	KICH	0.480575
TCGA-KN-8432	Normal	KICH	1.44493
TCGA-KN-8433	Tumor	KICH	0.818769
TCGA-KN-8433	Normal	KICH	1.09173
TCGA-KN-8434	Tumor	KICH	0.949722
TCGA-KN-8434	Normal	KICH	1.01493
TCGA-KN-8435	Tumor	KICH	0.805127
TCGA-KN-8435	Normal	KICH	1.13258
TCGA-KN-8436	Tumor	KICH	0.449429
TCGA-KN-8436	Normal	KICH	1.42643
TCGA-KN-8437	Tumor	KICH	0.493852
TCGA-KN-8437	Normal	KICH	1.43856
TCGA-KO-8403	Tumor	KICH	0.272979
TCGA-KO-8403	Normal	KICH	0.993203
TCGA-KO-8415	Tumor	KICH	0.956428
TCGA-KO-8415	Normal	KICH	1.39561
TCGA-KS-A41I	Tumor	THCA	1.48939
TCGA-KS-A41I	Normal	THCA	0.948825
TCGA-KS-A41J	Tumor	THCA	2.22299
TCGA-KS-A41J	Normal	THCA	1.26724
TCGA-KS-A41L	Tumor	THCA	1.6755
TCGA-KS-A41L	Normal	THCA	1.42573
TCGA-L5-A43C	Tumor	ESCA	3.94244
TCGA-L5-A43C	Normal	ESCA	0.511569
TCGA-L5-A4OG	Tumor	ESCA	3.30192
TCGA-L5-A4OG	Normal	ESCA	0.97284
TCGA-L5-A4OJ	Tumor	ESCA	2.45267
TCGA-L5-A4OJ	Normal	ESCA	1.288
TCGA-L5-A4OO	Tumor	ESCA	3.3502
TCGA-L5-A4OO	Normal	ESCA	0.826274
TCGA-MY-A5BF	Tumor	CESC	4.48149
TCGA-MY-A5BF	Normal	CESC	2.00087
TCGA-P4-A5E8	Tumor	KIRP	3.15555
TCGA-P4-A5E8	Normal	KIRP	1.1281
TCGA-P4-A5ED	Tumor	KIRP	3.41982
TCGA-P4-A5ED	Normal	KIRP	1.03393
TCGA-P8-A5KC	Tumor	PCPG	1.09997
TCGA-P8-A5KC	Normal	PCPG	1.63441
TCGA-P8-A5KD	Tumor	PCPG	1.48321
TCGA-P8-A5KD	Normal	PCPG	1.67785
TCGA-SQ-A6I4	Tumor	PCPG	2.13037
TCGA-SQ-A6I4	Normal	PCPG	1.65081
TCGA-V5-A7RE	Tumor	ESCA	2.11666
TCGA-V5-A7RE	Normal	ESCA	1.63455
TCGA-V5-AASX	Tumor	ESCA	3.63099
TCGA-V5-AASX	Normal	ESCA	3.6756
TCGA-W5-AA2I	Tumor	CHOL	1.48872
TCGA-W5-AA2I	Normal	CHOL	0.204015
TCGA-W5-AA2Q	Tumor	CHOL	2.81242
TCGA-W5-AA2Q	Normal	CHOL	0.757621
TCGA-W5-AA2U	Tumor	CHOL	1.67279
TCGA-W5-AA2U	Normal	CHOL	0.444985
TCGA-W5-AA2X	Tumor	CHOL	6.53599
TCGA-W5-AA2X	Normal	CHOL	0.380508
TCGA-W5-AA30	Tumor	CHOL	2.08865
TCGA-W5-AA30	Normal	CHOL	0.497127
TCGA-W5-AA31	Tumor	CHOL	2.07176
TCGA-W5-AA31	Normal	CHOL	0.223052
TCGA-W5-AA34	Tumor	CHOL	3.07534
TCGA-W5-AA34	Normal	CHOL	0.092884
TCGA-WA-A7GZ	Tumor	HNSC	4.58576
TCGA-WA-A7GZ	Normal	HNSC	2.64476
TCGA-X7-A8D6	Tumor	THYM	1.87716
TCGA-X7-A8D6	Normal	THYM	1.61998
TCGA-X7-A8D7	Tumor	THYM	2.16256
TCGA-X7-A8D7	Normal	THYM	1.89902
TCGA-Y8-A8RY	Tumor	KIRP	1.22188
TCGA-Y8-A8RY	Normal	KIRP	1.34625
TCGA-YB-A89D	Tumor	PAAD	3.30603
TCGA-YB-A89D	Normal	PAAD	2.41265
TCGA-ZU-A8S4	Tumor	CHOL	0.959177
TCGA-ZU-A8S4	Normal	CHOL	0.216238
